## A TBX5 dosage-sensitive gene regulatory network for human congenital heart disease

2

4 Irfan S. Kathiriya<sup>1,2,3\*</sup>, Kavitha S. Rao<sup>1,2,3</sup>, Giovanni Iacono<sup>4</sup>, W. Patrick Devine<sup>1,5</sup>, Swetansu K.  
Hota<sup>1,2</sup>, Michael H. Lai<sup>1,2</sup>, Bayardo I. Garay<sup>1,2,3</sup>, Reuben Thomas<sup>1</sup>, Andrew P. Blair<sup>1,8</sup>, Henry Z.  
6 Gong<sup>8</sup>, Lauren K. Wasson<sup>6,7</sup>, Piyush Goyal<sup>1,2</sup>, Tatyana Sukonnik<sup>1,2</sup>, Gunes A. Akgun<sup>1,2</sup>, Laure D.  
Bernard<sup>1,2</sup>, Brynn N. Akerberg<sup>9</sup>, Fei Gu<sup>9</sup>, Kai Li<sup>9</sup>, William T. Pu<sup>9,10</sup>, Joshua M. Stuart<sup>8</sup>, Christine  
8 E. Seidman<sup>6,7</sup>, J. G. Seidman<sup>6</sup>, Holger Heyn<sup>4,11</sup>, Benoit G. Bruneau<sup>1,2,12,13\*</sup>

10 1. Gladstone Institutes, San Francisco, CA, USA.

12 2. Roddenberry Center for Stem Cell Biology and Medicine at Gladstone, San Francisco, CA,  
USA

14 3. Department of Anesthesia and Perioperative Care, University of California, San Francisco,  
CA, USA

16 4. CNAG-CRG, Centre for Genomic Regulation (CRG), Barcelona Institute of Science and  
Technology (BIST), Barcelona, Spain;

18 5. Department of Pathology, University of California, San Francisco, CA, USA

6. Department of Genetics, Harvard Medical School, Boston, MA USA

20 7. Howard Hughes Medical Institute, Division of Cardiovascular Medicine, Brigham and  
Women's Hospital, Boston, MA USA

22 8. Department of Biomolecular Engineering, University of California, Santa Cruz, Santa Cruz,  
CA, USA

9. Department of Cardiology, Boston Children's Hospital, Boston, MA, USA

24 10. Harvard Stem Cell Institute, Harvard University, Cambridge, MA, USA

11. Universitat Pompeu Fabra, Barcelona, Spain

26 12. Department of Pediatrics, University of California, San Francisco, CA, USA

13. Cardiovascular Research Institute, University of California, San Francisco, CA, USA

28 \* Authors for correspondence: [irfan.kathiriya@ucsf.edu](mailto:irfan.kathiriya@ucsf.edu), [benoit.bruneau@gladstone.ucsf.edu](mailto:benoit.bruneau@gladstone.ucsf.edu)

## 30 **Abstract**

Haploinsufficiency of transcriptional regulators causes human congenital heart disease  
32 (CHD) <sup>1</sup>. This observation predicts gene regulatory network (GRN) imbalances <sup>2</sup>, but the nature  
of dosage-vulnerable GRNs and their contribution to human cardiogenesis and CHDs are  
34 unknown. Here, we define transcriptional consequences of reduced dosage of the CHD  
transcription factor *TBX5* during human cardiac differentiation from induced pluripotent stem  
36 (iPS) cells. Single cell RNAseq revealed that transcriptional responses to reduced *TBX5* levels  
are not homogeneous, and instead, discrete sub-populations of cardiomyocytes exhibit  
38 dysregulation of distinct *TBX5* dose-sensitive genes related to cellular phenotypes and CHD-  
associated genetics. Cellular trajectory inference revealed *TBX5* dosage-dependent  
40 differentiation paths, with implications for cardiac developmental identity. GRN analysis of the  
single cell RNAseq data identified vulnerable nodes enriched for CHD genes, implicating a  
42 critical sensitivity to *TBX5* dosage in cardiac network stability. A novel GRN-predicted genetic  
interaction between *TBX5* and *MEF2C* was validated in mouse, revealing a highly dosage-  
44 sensitive pathway for CHD. Our results reveal unforeseen complexity and exquisite sensitivity to  
*TBX5* dosage in discrete sub-populations of iPSC-derived cardiomyocytes, providing  
46 mechanistic insights into human CHDs and quantitative transcriptional regulation in disease.

## 48 **Introduction**

CHDs are a leading cause of childhood morbidity and mortality, and incidence of CHD is  
50 estimated to be ten-fold higher in human fetuses than live births <sup>3,4</sup>. Many human mutations

52 linked to CHD predict reduction in dosage of transcriptional regulators, including transcription  
factors (TFs) and chromatin-modifying genes <sup>1</sup>. Despite advances in tracing the roles of  
individual factors, how altered dosage of transcriptional regulators translates to altered  
54 transcriptional activity is not known, nor is it known how these altered GRNs disrupt heart  
development, resulting in CHD.

56 Heterozygous mutations in the T-box TF gene *TBX5* cause Holt-Oram syndrome (HOS)  
<sup>5,6</sup>, which presents with upper limb defects, CHDs, diastolic dysfunction, or arrhythmias. In  
58 humans, homozygous *TBX5* loss of function is presumed to cause fetal demise. Altered  
expression of select genes in mice *in vivo* demonstrate a stepwise sensitivity to reductions in  
60 *Tbx5* dosage <sup>7,8</sup>. These findings suggest that a reduction in *TBX5* dosage perturbs downstream  
gene expression, but the overall disrupted networks and mechanisms are not understood.

62 Mechanistic investigation of human CHD has been hampered by a lack of relevant and  
tractable models. Human heart tissue is largely inaccessible for molecular analysis, and  
64 pathological or surgical specimens are limited. However, induced pluripotent stem (iPS) cells,  
genome editing, directed differentiation, and single cell RNAseq together provide a human  
66 cellular platform for gene-centered cardiac disease modeling at single cell resolution. In  
considering how transcriptional regulator haploinsufficiency might cause CHD, at least two  
68 scenarios are possible: 1. That reduced dosage affects genes only in specific anatomical  
locations, such as the atrial septum. 2. That reduced dosage affects cardiac gene expression  
70 broadly, but altered programs manifest as morphologic defects only in structures most sensitive  
to the disturbance. The first scenario would make it challenging to discover altered gene  
72 expression in 2-dimensional cultures if susceptible cell types are absent. The second may  
predict that homogeneous changes in gene expression might be detected in that context, as  
74 corroborated by bulk RNAseq studies of heterozygous human iPS cell models of CHD <sup>9-11</sup>.  
However, it is likely that relevant, discrete alterations in a complex cell mixture were not

76 detected in those studies. Therefore, how reduced dosage of a transcriptional regulator alters  
GRNs in susceptible cells leading to CHD remains unclear.

78

### Impaired human cardiac differentiation and function by reduced TBX5 dosage

80 To determine a role for TBX5 dosage in human cardiac biology, we created an allelic  
series of human iPS cells mutant for *TBX5* by using CRISPR/Cas9-mediated genome editing, to  
82 target exon 3 of *TBX5* at the start of the essential T-box domain (Fig. 1a). We isolated targeted  
iPS cell lines: control (*TBX5*<sup>+/+</sup>), heterozygous (*TBX5*<sup>in/+</sup>) and homozygous (*TBX5*<sup>in/del</sup> and  
84 *TBX5*<sup>PuR/PuR</sup>) mutants (Fig. 1b, Extended Data 1). TBX5 protein levels in cardiomyocytes  
differentiated from these lines were diminished in *TBX5*<sup>in/+</sup> and absent in *TBX5*<sup>in/del</sup> and  
86 *TBX5*<sup>PuR/PuR</sup> cells (Fig. 1c), consistent with a dosage-step allelic series of mutant *TBX5* loss-of-  
function cell lines.

88 We observed reduced cardiomyocyte differentiation efficiency, a delay in onset of  
beating, and worsening sarcomere disarray, by graded loss of *TBX5* (Fig. 1d-j, Extended Data  
90 2). Patch clamp analysis revealed lengthened action potentials (AP) in *TBX5*<sup>in/del</sup> cells (Fig. 1k, l;  
APD90, adj p-value<0.04 by Holm-Sidak test<sup>12</sup>), consistent with previous findings<sup>13-15</sup>. Fluo-4  
92 imaging measurements uncovered protracted calcium transient duration in *TBX5*<sup>in/del</sup> and  
*TBX5*<sup>PuR/PuR</sup> cells (T90 down, adj p-value<9E-4 by Holm-Sidak test), with an intermediate defect  
94 in *TBX5*<sup>in/+</sup> cells (adj p-value<0.01) (Fig. 1m, n), consistent with findings in murine postnatal  
atrial CMs<sup>16</sup>. These findings may underlie diastolic dysfunction in HOS in mice and humans<sup>17</sup>.

96

### Resolving TBX5 dosage-sensitive transcriptomes during human cardiac differentiation

98 To determine if reduced TBX5 dosage alters gene expression in potentially vulnerable  
cell types, we used a droplet-based single cell RNAseq method with cells collected from



100 parental WTC11, control *TBX5*<sup>+/+</sup>, and mutant *TBX5* (*TBX5*<sup>in/+</sup>, *TBX5*<sup>in/del</sup>) genotypes during  
directed cardiac differentiation (Fig. 2a). Heterogeneous cell populations composed of cardiac  
102 precursors (CP) at day (d) 6, and cardiomyocytes (CMs) at d11 or d23, were harvested. We  
interrogated 64,396 cells with an average normalized read depth of 88,234 reads per cell (Fig.  
104 2b-d; Extended Data 3). At d6, we identified 11 cell clusters, representing at least four cell  
types, including *POU5F1*<sup>+</sup> pluripotent cells, *MESP1*<sup>+</sup> mesoderm, *ISL1*<sup>+</sup> cardiac precursors and  
106 nascent *TNNT2*<sup>+</sup> cardiomyocytes (Extended Data 3). At d11 and d23, differentiated cell types  
were identified by specific marker genes (Extended Data 3). This included a diversity of *TBX5*<sup>+</sup>  
108 cell types, comprising very few *PLVAP*<sup>+</sup> endothelial cells or *TTR*<sup>+</sup> endodermal cells, some  
*COL1A1*<sup>+</sup> fibroblasts and, most abundantly, *TNNT2*<sup>+</sup> cardiomyocytes (Extended Data 3, 4). All of  
110 these major cell types were present and detected in each *TBX5* genotype at d11 or d23  
(Extended Data 3).

112 We applied this classification of human cell types to learn more about the genes that  
contribute to CHDs. We examined the expression of 376 CHD-associated candidate genes,  
114 compiled from <sup>18-25</sup>, across the major cell types regardless of *TBX5* genotypes at d23 (Extended  
Data 4, Supplemental Table 1). For many CHD-associated genes, we observed enrichment of  
116 gene expression in CMs (e.g. *TBX5*, *FOXH1*, *ARID1A*, *EP300*, *KDM6A*, *PKD1*; adj p-value<0.05  
by Wilcoxon Rank Sum test), fibroblasts (e.g. *SMARCA2*, *PITX2*, *ZEB2*, *HAND2*; adj p-  
118 value<0.05), endoderm (e.g. *TBX3*, *WDR5*, *SALL4*, *NODAL*; adj p-value<0.05), endothelial cells  
(e.g. *FGFR1*, *TGFBR2*, *SHANK3*, *KCNJ2*; adj p-value<0.05) or other cell types (Extended Data  
120 4). This gene expression dataset provides a resource that helps identify progenitors to these cell  
types and may allow further categorization of human CHD-associated candidate genes.

122

### **TBX5 dose-dependent cellular trajectories during human cardiac differentiation**

124 To assess if altered transcriptional states in *TBX5* mutant cells reflected changes in  
paths of differentiation, we inferred cellular trajectories of each *TBX5* genotype in our allelic  
126 series using the R package URD <sup>26</sup>, which predicts cellular chronology based on user-  
determined origins and ends. We defined *POU5F1*<sup>+</sup> cells from d6 as a root and each d23 cluster  
128 as an individual tip in a pseudotime tree (Fig. 2b-d, Extended Data 5). *TBX5*<sup>in/+</sup> cells followed a  
path similar to wildtype and control (collectively “WT”) cells during differentiation to CMs (Fig. 2e,  
130 f, dashed lines), but within the shared branch, a tip occupied by *TBX5*<sup>in/+</sup> CMs (red arrowhead)  
was disparate from wildtype (black arrowhead) and control, demonstrating *TBX5*<sup>in/+</sup> CMs distinct  
132 from WT. In contrast, *TBX5*<sup>in/del</sup> cells deviated from the differentiation path (Fig. 2g, blue dashed  
line, blue arrowheads). We identified several genes (e.g. *NAV1*, *TECRL*, *LAMA4*, and *NPPA*),  
134 which were positively correlated with pseudotime ( $\rho \geq |0.4|$ , p-value < 0.05 by two-sided *t* test) in  
the WT/*TBX5*<sup>in/+</sup> branch, but not in the *TBX5*<sup>in/del</sup> branch (Z-score  $\geq 15$  by difference in  $\rho$ ),  
136 suggesting that these genes were not activated properly in *TBX5*<sup>in/del</sup> cells (Fig. 2h, i, Extended  
Data 5). Likewise, we identified several genes (e.g. *DES*, *TBX2*, *RSPO3*, and *LBH*) that  
138 positively correlated with pseudotime in *TBX5*<sup>in/del</sup> cells ( $\rho \geq |0.4|$ , p-value < 0.05), but not in  
wildtype cells (Z-score  $\geq 15$ ) (Fig. 2j, Extended Data 5), signifying that these genes are  
140 inappropriately deployed in *TBX5*<sup>in/del</sup> cells.

To identify genes that may determine one cell trajectory route from another, we  
142 assessed differential gene expression between imputed intermediates, which we considered as  
potential precursors, within branches proximal to *TBX5* genotype-specific tips. We compared  
144 these intermediate branches of cells that distinguish the cell trajectory route to CMs of wildtype,  
control and *TBX5*<sup>in/+</sup> from *TBX5*<sup>in/del</sup> (Fig. 2k, segments 69 vs. 70). We identified several  
146 differentially expressed genes, including structural genes (e.g. *MYL3*, *TTN*, *MYH6*, *TNNT2*,  
*TNNI1*; adj p-value < 0.05 by Wilcoxon Rank Sum test), calcium handling genes (*PLN*, *ATP2A2*,  
148 *RYR2*; adj p-value < 0.05), secreted factors (*WNT2*, *FGFR1*; adj p-value < 0.05), and cardiac TFs  
(*IRX4*, *HAND2*; adj p-value < 0.05) (Extended Data 5). Of note, expression of the CHD-

150 associated cardiac transcription factor *NKX2-5*, a transcriptional partner of *TBX5*<sup>7,27,28</sup>, was  
differentially expressed between intermediate branches of the URD tree that distinguish  
152 wildtype/control/*TBX5*<sup>in/+</sup> *TNNT2*<sup>+</sup> cells from *TBX5*<sup>in/del</sup> *TNNT2*<sup>+</sup> cells (Fig. 2l; adj p-value<1E-300  
by Wilcoxon Rank Sum test). Onset of *NKX2-5* expression was delayed in *TBX5*<sup>in/del</sup> cells (adj p-  
154 value<0.05 by Bonferroni-Holm multiple testing correction), along with a module of genes (e.g.  
*PARP1*, *RPL37*, *KIAA1462* and *ATP1A1*; adj p-value<0.05), concomitant with *NKX2-5*  
156 expression (Fig. 2l, Extended Data 5), providing a potential molecular explanation for a delay of  
onset of beating by *TBX5* loss (Fig. 1e).

158

### **Quantitative transcriptomic responsiveness to reduced *TBX5* dosage in cardiomyocytes**

160 *TBX5* genotype-specific clusters emerged among cardiomyocytes at d11 (Fig. 2c), and  
*TBX5* genotype-specific segregation was more striking at d23, particularly in *TNNT2*<sup>+</sup> cells (Fig.  
162 2d). We focused on *TNNT2*<sup>+</sup> clusters at d23 (Fig. 3a, b) and d11 (Extended Data 6). We  
constructed a phylogenetic tree relating 25 different *TNNT2*<sup>+</sup> cell clusters (Fig. 3c), and  
164 observed heterogeneity of gene set enrichment among WT or *TBX5*<sup>in/+</sup> clusters (Fig. 3d),  
implying putative CM subtypes. Some CM subtypes did not fit conventional categorization  
166 based on anatomy. We searched for differentially expressed genes, by pair-wise comparisons  
of related subtypes between *TBX5* genotypes. To identify *TBX5* genotype-specific differences  
168 within a CM subtype, we compared clusters enriched for WT to related clusters enriched for  
*TBX5*<sup>in/+</sup> or *TBX5*<sup>in/del</sup> cells (Fig. 3d-k). We discovered only a few common changes in gene  
170 expression amongst pair-wise cluster comparisons of WT vs *TBX5*<sup>in/+</sup> clusters, such as *NPW*  
and *PLN* (Fig. 3d-i; adj p-value<0.05 by Wilcoxon Rank Sum test). We also discerned  
172 differences in gene expression based on cluster-specific comparisons (adj p-value<0.05 by  
Wilcoxon Rank Sum test), implying discrete cell subtype-sensitivity to *TBX5* haploinsufficiency  
174 (Fig. 3d-i) or *TBX5* loss (Extended Data 7). We also compared related *TBX5* genotype-specific

cell clusters at a lower resolution of Louvain clustering and discovered genes that were  
176 differentially expressed across reduced *TBX5* dosage in a variety of patterns (Fig. 3j, k).  
Quantitative changes in gene expression level were apparent across *TBX5* genotypes (for  
178 example, *PLN*, *FYXD1*; adj p-value<0.05 by Wilcoxon Rank Sum test), as were changes in both  
expression level and percentage of expressing cells (e.g. *RSPO3*, *NPPA*, *TECRL*, *DES*) (Fig.  
180 3k).

This differentially expressed gene set was enriched for electrophysiology (EP)-related  
182 genes (FDR<0.05, Fig. 3l), which are implicated in membrane depolarization (*SCN5A*), calcium  
handling (*RYR2*, *ATP2A2*, and *PLN*) and arrhythmias (*TECRL*) (Fig. 3e, g, i, k, l). Several  
184 altered transcripts were encoded by other genes implicated in CHD (*CITED2*, *MYOCD*,  
*ANKRD1*) (Fig. 3e, g, i, k, l). Some *TBX5*-dependent genes that were previously associated with  
186 CHD or arrhythmias by genome-wide association studies (GWAS) were identified (Fig. 3l). We  
uncovered *IGFBP7*, *FRAS1*, *MYH7B* and *SMCHD1* for CHD (odds ratio 3.2, FDR<0.03) and 47  
188 reported genes for arrhythmias (for example, *PLN*, *HCN4*, *SCN5A*, *GJA1*, *PITX2* and *TECRL*;  
odds ratio 9.0, FDR<1.9E-39) among *TBX5*-sensitive genes at day 23 (Fig. 3m, Supplementary  
190 Table 2).

Using orthogonal assays at single cell resolution, we found that *TBX5* dosage-  
192 dependent downregulation of *NPPA* was evident in CMs by RNAscope (*TBX5*<sup>in/+</sup>, p<0.05;  
*TBX5*<sup>in/del</sup> or *TBX5*<sup>PuR/PuR</sup>, p<1E-4 by Student's t-test), consistent with a *TBX5*-dependent  
194 rheostatic regulation of this gene in mouse<sup>7,8</sup>. Loss of *DES* in *TBX5*<sup>in/+</sup> and recovery in *TBX5*<sup>in/del</sup>  
was detected in CMs by flow cytometry (Extended Data 8, p-value<1E-4 by Chi-Square test),  
196 corroborating some human *TBX5* dose-dependent sequelae.

Comparisons of biological replicates at d23 showed significant overlap of *TBX5*-  
198 dependent genes for WT vs. *TBX5*<sup>in/+</sup> (p-value<2.466e-9 by hypergeometric test) or WT vs.  
*TBX5*<sup>in/del</sup> (p-value<5.410e-6) (Extended Data 9, 10). The differences in gene expression  
200 between biological replicates likely reflect a combination of technical variability and biological

stochasticity that, as in patients with *TBX5* mutations, may explain variable expressivity of  
202 disease for a given mutation. Since modifiers in different genetic backgrounds might modulate  
phenotypic effects, we assessed iPSC lines of *TBX5* mutants in an independent genetic  
204 background (PGP1, from a Caucasian male, compared to WTC11 from a Japanese male,  
Extended Data 11). Comparisons of *TBX5*-dependent genes in d23 *TNNT2*<sup>+</sup> cells showed  
206 significant overlap between WTC11 vs. *TBX5*<sup>in/+</sup> and PGP1 vs. *TBX5*<sup>in/+</sup> (p-value<1.174e-8 by  
hypergeometric test) or WTC11 vs *TBX5*<sup>in/del</sup> and PGP1 vs. *TBX5*<sup>del/del</sup> (p-value<7.260e-15)  
208 (Extended Data 11, 12), proportionally similar to biological replicates (Extended Data 9, 10).  
These results demonstrate reproducible *TBX5* dosage-dependent alterations from independent  
210 experiments, genetic backgrounds, and gene targeting strategies.

To assess if changes to *TBX5* dose-sensitive genes were largely direct or indirect *TBX5*  
212 targets, we examined *TBX5* occupancy in human iPSC-derived CMs from a published dataset  
<sup>10</sup>. We found correlations of *TBX5* occupancy near *TBX5* dosage-vulnerable gene sets (Fig. 3l,  
214 m, and Extended Data 13, 14; for example, odds ratio 6.9 for all *TBX5*-dependent human  
genes; FDR<1.9E-178), suggesting our identified genes may be direct *TBX5* targets. *TBX5*  
216 cooperates with GATA4 for cardiac gene regulation <sup>10,28,29</sup>; we also observed that GATA4  
occupancy <sup>10</sup> with *TBX5* was highly associated near *TBX5*-dependent genes (Fig. 3l, m, and  
218 Extended Data 13, 14; for example, odds ratio 6.4 for all *TBX5*-dependent human genes;  
FDR<1.3E-155), indicating that GATA4 may have a role modulating *TBX5* dosage-sensitive  
220 genes.

## 222 **Susceptible human gene regulatory networks for congenital heart disease**

Since CHD-associated and arrhythmia-related genes were enriched among *TBX5*-  
224 dependent genes, we deduced that *TBX5* may be vital for preserving the integrity of cardiac  
gene regulatory networks (GRNs). To evaluate the role of *TBX5* dosage for regulating GRNs,

226 we used bigSCale2<sup>30</sup> to independently infer putative GRNs from single cell expression data of  
228 *TNNT2*<sup>+</sup> cells at d6, d11 and d23 of each *TBX5* genotype (Fig. 4a, b, Extended Data 15). This  
230 allows for quantitative prediction of the biological importance of genes in a regulatory network  
232 reconstructed with bigSCale2, by applying the concept of “pagerank”<sup>30</sup>, first devised to rank the  
234 importance of websites via numerical weighting<sup>31</sup>, to discover genes with a loss in importance  
(i.e. centrality) among *TBX5* genotypes. By comparing nodes from inferred networks of WT to  
236 *TBX5*<sup>in/+</sup> or *TBX5*<sup>in/del</sup>, we uncovered several nodes that displayed reduced pagerank centrality at  
238 specific time points and levels of reduced *TBX5* dosage (Fig. 4a-c, Extended Data 15). These  
240 included *RYR2* and twenty CHD-associated genes (for example, *GATA6*, *HAND2*, *SMAD2*,  
p<2.2e-5 by hypergeometric test,) (Fig. 4c, d, Extended Data 15), consistent with independent  
242 analysis from differential gene expression. For example, at d11, pagerank centrality of the CHD-  
associated TF *SMAD2* was absent in *TBX5*<sup>in/+</sup> cells (Fig. 4a-c, top 5% of all changes), indicating  
244 an impairment of *SMAD2* function. Centrality of the cardiac development-related TF *MEF2C*,  
which is necessary for heart development<sup>32</sup>, was substantially reduced by heterozygosity or  
246 loss of *TBX5* at d11 (Fig. 4a-c, top 5% cutoff). *MEF2C* gene expression was unchanged by  
reduced *TBX5* dosage, suggesting a change in *MEF2C* functional connectivity. These altered  
248 GRNs show that *TBX5* dosage is critical for maintaining cardiac network stability, and unveil  
potential genetic interactions disrupted in *TBX5*-dependent CHDs.

244 To further investigate the predicted relationship between *TBX5* and *MEF2C* within a  
dosage-sensitive CHD-associated GRN, we used a complementary approach using bigSCale2,  
246 to identify gene-gene correlations with *TBX5* expression in individual *TNNT2*<sup>+</sup> cells across  
timepoints and *TBX5* genotypes (Fig. 4e). Genes highly co-expressed with *TBX5* (Pearson  
248 coefficient >0.5) regardless of *TBX5* genotype suggested potential cell autonomous effects by  
*TBX5* dosage (for example, *PLN*, *RYR2*, *TTN*), while those with high anti-correlation (Pearson  
250 coefficient <-0.5) suggested non-cell autonomous effects (for example, *HES1*, *TLE1*, *CBX1*,

ETV4, ID4, FGFR1). MEF2C expression was among the highest correlated with TBX5  
252 expression and demonstrated greatest TBX5-dependent decrease of pagerank (Fig. 4c, e) or  
degree (i.e. putative number of target genes, Supplemental Table 3) at d11, further suggesting  
254 MEF2C as a candidate for mediating TBX5 dose-sensitive regulatory effects. Multiple genes  
that correlated with MEF2C displayed diminished levels of degree by reduced TBX5 dosage (for  
256 example, SMYD1, PDK1, MYOCD, TTN, RYR2; top 5% cutoff) (Fig. 4f, Supplementary Table  
3), supporting a potential explanation for changes to MEF2C functional connectivity in a TBX5  
258 dosage-sensitive GRN.

We evaluated the predicted genetic interaction between TBX5 and MEF2C *in vivo*. We  
260 used a hypomorphic allele of *Tbx5* (*Tbx5*<sup>CreERT2IRES2xFLAG</sup>, abbreviated *Tbx5*<sup>CreERT2</sup>)<sup>33</sup>, which we  
further characterized (Extended Data 16) to probe for a potentially highly-sensitive genetic  
262 interaction between *Tbx5* and a null allele of *Mef2c* (*Mef2c*<sup>del</sup>)<sup>32</sup>. *Tbx5*<sup>CreERT2/+</sup>;*Mef2c*<sup>del/+</sup> mice  
were underrepresented at weaning (Fig. 5a). By histology, we detected muscular (n=3 of 4) or  
264 membranous (n=1 of 4) VSDs in compound heterozygous embryos at E14.5, which were not  
apparent in *Tbx5*<sup>CreERT2/+</sup> or *Mef2c*<sup>del/+</sup> embryos (Fig. 5b-k). These findings demonstrate a highly-  
266 sensitive genetic interaction between *Tbx5* and *Mef2c* in mouse *in vivo*, consistent with  
prediction from the human TBX5 dose-sensitive GRN.

268 We speculated that MEF2C may play a direct role to co-regulate TBX5-dependent gene  
expression. Chromatin occupancy<sup>34</sup> of TBX5, MEF2c, and MEF2a (also predicted to be part of  
270 the TBX5-dependent GRN) was highly correlated near TBX5-sensitive human or mouse genes  
(for example, *HAND2*, *FHL2*, *TECRL*, *NPPA/NPPB*; Fig 5i-q, Extended Data 17, 18, 19;  
272 FDR<0.05 for multiple comparisons). Thus, direct co-regulation of target genes by TBX5,  
MEF2c, and MEF2a, in addition to previously known interactions with NKX2-5 and GATA4, may  
274 be a potential TBX5 dosage-dependent mechanism for CHDs.



## 276 Discussion

Our studies with a human cellular model of CHD has defined consequences of reduced  
278 TBX5 dosage during cardiac differentiation at single cell resolution. Of potential relevance to a  
range of anatomical and functional manifestations of *TBX5* haploinsufficiency, we uncovered  
280 discrete responses to reduced TBX5 dosage in susceptible cardiomyocyte subtypes. The  
quantitative specificity of TBX5-dependent cell types underscores cellular complexity in  
282 response to transcription factor dosage. Analysis of human TBX5 dose-sensitive GRNs  
identified vulnerable nodes enriched for CHD-associated or cardiac development genes,  
284 suggesting a vital role for TBX5 dosage to maintain cardiac network stability. The sensitivity of a  
GRN to transcription factor dosage has been observed in *Drosophila* embryo patterning<sup>35</sup> for  
286 example, but has not been linked to human disease to date. The biophysical rules regulating  
transcription factor dosage sensitivity are only now becoming understood, and our results in a  
288 human CHD model may bring immediate pertinence of human disease to this biological context.

From TBX5-sensitive GRNs, we discovered several important nodes linking many CHD-  
290 related genes. For example, the reduced centrality of *MEF2C* in the TBX5-dependent GRN  
suggests an important and sensitive link between these cardiac transcription factors. Indeed, we  
292 validated this predicted genetic interaction in mouse, which yielded muscular VSDs, a type of  
CHD rarely observed in mouse models but common in humans. It is likely that other sensitive  
294 nodes in a TBX5-dependent network will illuminate novel aspects of CHD and cardiac gene  
regulation. Variability in CHDs with monogenic inherited or *de novo* mutations could be  
296 explained by additional mutations in genes that form part of these functional networks, as  
illuminated by our findings, and as evidenced by oligogenic inheritance of CHD-causing variants  
298<sup>11</sup>. Our results point to a genomic framework that will guide genetic insights into the  
underpinnings of CHD.

300



**Contributions.** I.S.K. and B.G.B conceived and designed the project. B.I.G., L.W., L.B., T.S.  
302 and I.S.K. performed gene targeting and isolation of mutant iPSCs. B.I.G., K.S.R, P.G., T.S.,  
and I.S.K. performed in vitro differentiation and harvested samples. P.G. performed the  
304 Western analysis. M.H.L. performed electrophysiology analyses. R.T. performed statistical  
analyses for electrophysiology. K.S.R. performed immunostaining and scoring of  
306 cardiomyocytes. G.A.A. performed RNAscope and flow cytometry. K.S.R. and I.S.K. performed  
Seurat analyses. K.S.R., A.P.B., H.G., and I.S.K. performed pseudotime analyses. H.G.  
308 implemented the cell browser. G.I. performed gene regulatory network analyses. W.P.D. and  
I.S.K. performed phenotype analyses of mutant mice. I.S.K. performed bulk RNAseq analyses.  
310 B.N.A., F.G., K.L., and W.T.P. performed ChIP-seq experiments and peak calling. S.K.H. and  
R.T. performed association analyses of co-occupancy, gene expression and disease  
312 candidates. J.M.S., W.T.P., C.E.S., J.G.S., and H.H. provided advisement. I.S.K. and B.G.B.  
wrote the manuscript, with comments and contributions from all authors.

314

**Acknowledgements.** We thank Dario Miguel-Perez and Sarah Wood for mouse genotyping  
316 and colony maintenance, Jeff Farrell for input on URD, David Joy and Todd McDevitt for sharing  
in-house imaging software, Brian Black for mouse lines, Kathryn Claiborn for editorial  
318 assistance, and members of the Bruneau lab for discussions and comments. We also thank the  
Gladstone Bioinformatics, Genomics, Histology and Microscopy, and Stem Cell Cores, R. Sarah  
320 Elmes at the UCSF Laboratory for Cell Analysis, the UCSF Center for Advanced Technology,  
the Salk Institutes Center of Excellence for Stem Cell Genomics, Matthew Speir and Maximilian  
322 Haeussler at cells.ucsc.edu, and the UCSC Stem Cell Data Center Hub for their invaluable  
assistance. This work was supported by grants from the National Institutes of Health (NHLBI  
324 Bench to Bassinet Program UM1HL098179 to B.G.B. and UM1HL098166 to J.G.S. and W.T.P.,  
2T32HL007731-27 to S.K.H), , the Foundation for Anesthesia Education and Research

326 (Mentored Research Training Grant to I.S.K.), Society for Pediatric Anesthesia (Young  
Investigator Award to I.S.K.), Hellman Family Fund (I.S.K.), UCSF REAC Grant (I.S.K.) and  
328 UCSF Department of Anesthesia and Perioperative Care (New Investigator Award to I.S.K.).  
H.H. is a Miguel Servet (CP14/00229) researcher supported by the Spanish Institute of Health  
330 Carlos III (ISCIII) and Ministerio de Ciencia, Innovación y Universidades (SAF2017-89109-P;  
AEI/FEDER, UE). This work was also supported by the California Institute for Regenerative  
332 Medicine (RB4-05901 to B.G.B.), an NIH/NCRR grant (C06 RR018928) to the J. David  
Gladstone Institutes, the Younger Family Fund (B.G.B.), and the Office of the Assistant  
334 Secretary of Defense for Health Affairs through the Peer Review Medical Research Program  
under Award No. W81XWH-17-1-0191. Opinions, interpretations, conclusions and  
336 recommendations are those of the author and are not necessarily endorsed by the Department  
of Defense. In conducting research using animals, the investigator(s) adheres to the laws of the  
338 United States and regulations of the Department of Agriculture. In the conduct of research  
utilizing recombinant DNA, the investigator adhered to NIH Guidelines for research involving  
340 recombinant DNA molecules.

342 **Competing Interests:** B.G.B. is a co-founder and shareholder of Tenaya Therapeutics. None of  
the work presented here is related to the interests of Tenaya Therapeutics.

344

346

348 **Methods**

**Gene targeting and genotyping of human iPS cells mutant for *TBX5*.** sgRNAs for *TBX5*  
350 exon 3 (sgRNA1, TCCTTCTTGCAGGGCATGGA) or exon 7 (sgRNA2,  
CCTTTGCCAAAGGATTTTCG), which encode the T-box domain, were selected using  
352 crispr.genome-engineering.org, and cloned by annealing pairs of oligos into a plasmid  
containing humanized *S. pyogenes* Cas9, as described in <sup>36</sup> (px330-U6-Chimeric\_BB-CBh-  
354 hSpCas9 was a gift from Feng Zhang, Addgene #42230).

For WTC11-derivatives *TBX5*<sup>+/+</sup> (control), *TBX5*<sup>in/+</sup> or *TBX5*<sup>in/del</sup>, the induced pluripotent  
356 stem (iPS) cell line WTC11 (gift from Bruce Conklin, available at NIGMS Human Genetic Cell  
Repository/Coriell #GM25236) <sup>37</sup> was electroporated (Lonza #VPH-5012) with a cloned  
358 nuclease construct containing a guide RNA (sgRNA1) targeting exon 3 of *TBX5*, as described in  
<sup>37,38</sup>. Cells were plated on human ESC-grade Matrigel (Corning #354277) and cultured in  
360 mTeSR-1 (StemCell Technologies Cat #05850) with 10 $\mu$ M ROCK inhibitor (StemCell  
Technologies, Y-27632). For screening of *TBX5* exon 3 non-homologous end-joining (NHEJ)  
362 mutations, genomic DNA flanking the targeted sequence was amplified by PCR (For1:  
ATGGCATCAGGCGTGTCTATAA and Rev1: CCCACTTCGTGGAATTTTAGCCA), amplicons  
364 underwent digestion by NlaIII, and then evaluated for loss of NlaIII by gel electrophoresis  
(wildtype band 800bp, mutant band 880bp). Clones with no change, a heterozygous or  
366 homozygous loss of NlaIII were sequenced (For1: ATGGCATCAGGCGTGTCTATAA, Rev1:  
TTCCGGGCTTGAACCTTCTGG, Seq1: ATAGCCTTGTGCTGATGGCA).

368 For generation of *TBX5*<sup>PuR/PuR</sup>, a puromycin resistance gene cassette (Frt-PGK-EM7-  
PuroR-bpA-Frt) containing homology arms of 469bp (5' homology arm) and 466bp (3'  
370 homology arm) around the sgRNA1 target site at +9bp from the start of *TBX5* exon 3 was  
cloned by Cold Fusion (System Biosciences #MC010B) using amplicons from genomic DNA of  
372 WTC11 into a construct that was a modification of plasmid pEN114<sup>39</sup>. WTC11 cells were

electroporated with a cloned nuclease construct containing a guide RNA targeting exon 3, along  
374 with the *TBX5* exon3 homology arm-Frt-PGK-EM7-PuroR-bpA-Frt cassette and plated as a  
serial dilution in mTeSR-1 with Rock inhibitor, as described in <sup>38</sup>. On day 2 and subsequent  
376 days, cells were grown in media containing mTeSR-1, Rock inhibitor and puromycin (0.5ug/mL),  
to select for puromycin-resistant cells. For screening of *TBX5* exon 3 homology-directed repair  
378 (HDR) mutations, genomic DNA flanking the targeted sequence was amplified by PCR (For1:  
ATGGCATCAGGCGTGTCTATAA, and Rev2: CCCACTTCGTGGAATTTTAGCCA for  
380 wildtype, 797 bp, For1: ATGGCATCAGGCGTGTCTATAA, Rev3:  
GTTCTTGCAGCTCGGTGAC <sup>39</sup> for PuroR, 1631 bp). Positive 5' arm clones were genotyped by  
382 PCR for the 3' arm (For2: ATTGCATCGCATTGTCTGAG <sup>39</sup>, Rev4:  
TTTGACAATCGGGTGGGACC, 829 bp).

384 For PGP1-derivatives *TBX5*<sup>in/+</sup> or *TBX5*<sup>del/del</sup>, the iPS cell line PGP1 (gift from George  
Church, available at NIGMS Human Genetic Cell Repository/Coriell #GM23338) <sup>40</sup> was  
386 electroporated with a cloned nuclease construct containing a guide RNA (sgRNA2) targeting  
exon 7 of *TBX5*, as described in <sup>41</sup>. For screening of *TBX5* exon 7 NHEJ mutations, the targeted  
388 sequence was amplified using PCR primers (For3: GCTTCTTTTGGTTGCCAGAG, Rev5:  
CATTCTCCCCATTTCCATGT, Seq2: AGAGGCTGCATTTCCATGAT), Illumina compatible-  
390 libraries from clones were generated and multiplex-sequenced on a MiSeq for purity of  
homogeneity of clones for heterozygous or homozygous mutations, as described in <sup>41</sup>.

392

**Isolation of homogenous iPS cell clones.** Isolation of homogenous colonies for WTC11-  
394 derivatives *TBX5*<sup>+/+</sup> (control), *TBX5*<sup>in/+</sup> or *TBX5*<sup>in/del</sup> was performed by modification of methods  
described previously <sup>38,42</sup>. Briefly, single cell suspension of electroporated iPS cells was plated  
396 on Matrigel-coated 6 well plates (WP) (BD Bioscience #351146). Once cultures were adherent  
and recovered to ~80% confluency, cells were detached by Accutase Cell Detachment Solution  
398 (Stemcell Technologies #07920), diluted with 1X DPBS without Ca<sup>2+</sup>/Mg<sup>2+</sup> and singularized

using a P1000 filtered tip, and centrifuged. The cell pellet was resuspended in mTeSR-1, Rock  
400 inhibitor and Gentamicin (Life Technologies #15750-060) media, incubated with DAPI (1:1000  
from a 1mg/mL stock) for 5 min, centrifuged and resuspended at a concentration of at least  
402 1.0E6 cells/mL in mTeSR-1, Rock inhibitor and Gentamicin media without DAPI. After filtering  
cells with a 40-micron mesh into FACS tubes, remaining cells (about 120,000 cells per well)  
404 were plated on to 6WP for maintenance. Single cells were then sorted for DAPI negativity using  
a BD FACS Ariall or Arialll, with a 100-micron nozzle at the lowest flow rate available, into  
406 individual wells of a 96WP coated with Matrigel containing media of mTeSR-1, Rock inhibitor  
and Gentamicin. Upon recovery at 37°C, each well was evaluated one day later for no cells, one  
408 cell or more than one cell. All cells were maintained with mTeSR-1, Rock inhibitor and  
Gentamicin media for at least 5 days, then with mTeSR-1 alone for an additional 5-7 days. Each  
410 well at 25% confluency was harvested and re-plated upon singularization with P200 tips in  
96WP for more efficient cell growth. When the cell confluency of each well from “single” cells  
412 was nearly 100%, then 90% of cells were harvested for genotyping using QuickExtract DNA  
lysis solution (Epicentre #QE0905T), while 10% of cells were re-plated for the next round of cell  
414 selection for wells of interest by FACS sorting again or by serial dilution of cells for manual  
picking of colonies, as described in <sup>37,38</sup> from apparent “single” cells. Rounds were repeated until  
416 every daughter well showed the same genotype, consistent with homogeneity. Genomic DNA  
from individual wells of interest were amplified using high fidelity *Taq* polymerase, TA-cloned  
418 and sequenced to confirm genotype and homogeneity.

Isolation of a homogenous colonies for PGP1-derivatives *TBX5<sup>in/+</sup>* or *TBX5<sup>del/del</sup>* was  
420 performed, as described in {Byrne:2007fn}. Isolation of a homogenous colonies for WTC11-  
derivative *TBX5<sup>PuR/PuR</sup>* was performed, as described in <sup>38</sup>.

422 After sequencing confirmation of respective genotypes, karyotypically-normal cells from  
each iPS cell line were expanded for subsequent studies.

424

**Maintenance of iPS cells and differentiation to cardiomyocytes.** All iPS cell lines were  
426 transitioned to and maintained on growth factor-reduced basement membrane matrix Matrigel  
(Corning #356231) in mTeSR-1 medium. For directed cardiac differentiations, iPS cells were  
428 dissociated using Accutase and seeded on to 6WP or 12WP. The culture was allowed to reach  
80-90% confluency and induced with the Stemdiff Cardiomyocyte Differentiation Kit (Stemcell  
430 Technologies #05010), according to the manufacturer's instructions. Starting on day 7,  
differentiations were monitored daily for beating cardiomyocytes and onset of beating was  
432 recorded as the day when beating was first observed.

**Flow Cytometry.** iPS-derived cardiomyocytes from WTC11, Control, *TBX5<sup>in/+</sup>* and *TBX5<sup>in/del</sup>*  
434 lines were dissociated using Trypsin-EDTA 0.25% on day 15 or day 23 after induction of the  
436 differentiation protocol and fixed with 4% methanol-free formaldehyde. Cells were washed with  
PBS and permeabilized using FACS buffer (0.5% w/v saponin, 4% Fetal Bovine Serum in PBS).  
438 For evaluation of differentiation efficiency, cells were stained with a mouse monoclonal antibody  
for cardiac isoform Ab-1 Troponin at 1:100 dilution (ThermoFisher Scientific #MS-295-P) or the  
440 isotype control antibody (ThermoFisher Scientific #14-4714-82). For analyzing levels of Desmin  
protein, cells were co-stained with the mouse monoclonal antibody for cardiac isoform Ab-1  
442 Troponin at 1:100 dilution and recombinant rabbit anti-Desmin antibody at 1:70 dilution (Abcam  
#ab32362), or normal rabbit IgG antibody (Millipore Sigma #NI01) for 1 hour at room  
444 temperature. After washing with FACS buffer, cells were stained with the following secondary  
antibodies - goat anti-mouse IgG Alexa 594 at 1:200 dilution (ThermoFisher Scientific #A-  
446 11005) and donkey anti-rabbit IgG Alexa 488 at 1:200 dilution (ThermoFisher Scientific  
#A21206) for 1 hour at room temperature. Cells were then washed with FACS buffer, stained  
448 with DAPI for 5 minutes, rinsed, and filtered with a 40-micron mesh. At least 10,000 cells were  
analyzed using the BD FACSAriaII or AriaIII, and results were processed using FlowJo (BD  
450 Bioscience). Gating strategy is shown in Extended Data 20.

452 **Western blotting.** iPS-derived cardiomyocytes were harvested on day 15, pelleted and flash  
frozen. Protein was isolated from supernatant in RIPA buffer with EDTA-free protease and  
454 phosphatase inhibitor (ThermoFisher Scientific) after sonication (15 second pulse on, 15 second  
pulse off, for four pulses). After quantification by BCA assay (ThermoFisher Scientific), 150µg of  
456 total protein was loaded per well for each genotype. After running on SDS-PAGE and wet  
transfer with NuPage Transfer buffer (ThermoFisher Scientific) to a PVDF membrane, the blot  
458 was washed in PBST and incubated in primary antibodies of rabbit polyclonal anti-TBX5 at a  
1:400 dilution (Sigma #HPA008786) and mouse monoclonal anti-cTNT at 1:1000 dilution  
460 (ThermoFisher Scientific #MS-295-P), followed by secondary antibody incubation with donkey  
anti-rabbit IgG IRDye680 at 1:2000 dilution (Licor #926-68073) and donkey anti-mouse IgG  
462 IRDye800 at 1:2000 dilution (Licor #926-32212). The blot was imaged on an Odyssey FC Dual-  
Mode Imaging system (Licor).

464

**Fluorescent *in situ* hybridization.** iPS cell-derived cardiomyocytes from WTC11, Control,  
466  $TBX5^{in/+}$ ,  $TBX5^{in/del}$  and  $TBX5^{PuR/PuR}$  were dissociated using Trypsin-EDTA 0.25% on day 23 after  
induction of the differentiation protocol, and 25,000-40,000 cells were plated on to 8-well  
468 chambered slides (Ibidi #80826), to obtain a relatively sparse monolayer of cardiomyocytes.  
Cells were fixed the following day with 10% Neutral Buffered Formalin for 15 minutes at room  
470 temperature. Cells were then serially dehydrated in 50%, 70% and 100% ethanol and stored at -  
20°C until ready to be hybridized. *In situ* hybridization was performed using the RNAscope  
472 Multiplex Fluorescent v2 Assay kit (Advanced Cell Diagnostics #323100) with probes for *Hs-*  
*TNNT2* (#518991) and *Hs-NPPA* (#531281). Slides were imaged at 10X and 40X magnification  
474 on the Keyence BZ-X710 All-in-One Fluorescence Microscope. Mean intensity of *NPPA* signal  
was measured in each *TNNT2*<sup>+</sup> cell from every group. Unpaired t-tests were used to calculate  
476 statistical significance.

478 **Replating cardiomyocytes for single cell electrophysiology.** iPSC cell-derived  
cardiomyocytes (day 15 or older) from WTC11, Control, *TBX5<sup>in/+</sup>*, *TBX5<sup>in/del</sup>* and *TBX5<sup>PuR/PuR</sup>*  
480 were gently dissociated in Trypsin-EDTA 0.25% and quenched using StemDiff Maintenance  
Medium with 10% FBS. Cell suspension was centrifuged at 800 rpm for 5 minutes. The pellet  
482 was resuspended in StemDiff Maintenance Medium with Rock inhibitor at a 1:1000 dilution.  
Cardiomyocytes were counted, and 25,000-35,000 cells were plated on to growth factor-  
484 reduced Matrigel-coated 15mm round glass coverslips (Warner Instruments #64-0703) to obtain  
a sparse distribution. Cardiomyocytes were then maintained on coverslips in StemDiff  
486 Maintenance Medium.

488 **Patch Clamp Electrophysiology.** Patch clamp recordings were made on single iPSC-derived  
CMs using the perforated-patch configuration. Experiments were performed at 30°C under  
490 continuous perfusion of warmed Tyrode's solution containing (in mM): 140 NaCl, 5.4 KCl, 1  
CaCl<sub>2</sub>, 1 MgCl<sub>2</sub>, 10 glucose, and 10 HEPES, with the pH adjusted to 7.4 with NaOH.  
492 Recordings were conducted using borosilicate glass pipettes (Sutter Instruments) with typical  
resistances of 2 to 4MΩ. The pipette solution consisted of (in mM): 150 KCl, 5 NaCl, 5 MgATP,  
494 10 HEPES, 5 EGTA, 2 CaCl<sub>2</sub>, and 240 μg/mL amphotericin B, with the pH adjusted to 7.2 with  
KOH. Spontaneous action potentials were acquired in a zero-current current clamp  
496 configuration using an Axopatch 200B amplifier and pClamp 10 software (Axon Instruments).  
Data was digitized at 20 kHz and filtered at 1kHz. Action potential parameters from each cell  
498 were derived using Clampfit 10 software (Axon Instruments).

500 **Fluorescent recordings of calcium flux.** iPSC-derived CMs on glass coverslips were loaded  
with Ca<sup>2+</sup> indicator dye Fluo-4 AM (Thermo Fisher Scientific #F14201) to record Ca<sup>2+</sup> flux, as



502 previously described<sup>43</sup>. Measurements were made on spontaneously firing single or small  
clusters of iPSC-derived CMs using a 10X objective on a Zeiss Axio Observer Z1 inverted  
504 microscope. For experiments, cells were placed in Tyrode's solution containing 1.8 mM Ca<sup>2+</sup>  
within a 37°C heated stage-top imaging chamber (Okolab). Images were acquired at 100 fps  
506 using an ORCA-Flash 4.0 camera (Hamamatsu, Bridgewater, NJ). Data was processed using  
ZEN (Zeiss) or Image J software (<http://rsbweb.nih.gov/ij/>) and analyzed using custom in-house  
508 software<sup>44</sup>.

510 **Graphing and statistics for electrophysiology.** For electrophysiology and calcium imaging  
experiments, graphs were generated using Prism 8.2.0 (GraphPad Software). Significance  
512 between parental and experimental groups was determined with a custom R-script using  
unpaired two-sided Welch's *t* tests with Holm-Sidak correction for multiple comparisons<sup>12</sup>.  
514 Adjusted P < 0.05 was considered statistically significant.

516 **Immunostaining and scoring of cardiomyocytes.** iPSC-derived cardiomyocytes from  
WTC11, Control, TBX5<sup>in/+</sup> and TBX5<sup>in/del</sup> were replated on coverslips placed in 12-well plates on  
518 day 23, as described above for replating for electrophysiology. Cells were fixed in 4%  
formaldehyde for 20 minutes at room temperature, followed by washes in PBS. Cells were then  
520 treated with a blocking buffer containing 5% goat serum and 0.1% Triton X-100 in PBS for 1  
hour at room temperature. A mouse monoclonal antibody for cardiac isoform Ab-1  
522 Troponin (ThermoFisher Scientific #MS-295-P) was added to the coverslip-containing wells at a  
1:100 dilution in blocking buffer and incubated on a rocker for 2 hours at room temperature.  
524 Following washes with 0.1% Triton X-100 in PBS, coverslips were treated with a donkey anti-  
rabbit IgG Alexa 488 antibody (ThermoFisher Scientific #A21206) at a 1:200 dilution for 2 hours  
526 at room temperature. Coverslips were then washed with 0.1% Triton X-100 in PBS and stained

with DAPI at a 1:1000 dilution for 2 minutes. Coverslips were washed and stored in PBS at 4C.

528 Images were acquired on a Zeiss LSM 880 with Airyscan and processed by ImageJ <sup>45</sup>.

Myofibrillar arrangement in cardiomyocytes was manually scored on a scale of 1-5,  
530 similar to <sup>46</sup>. A score of 1 represents cells with intact myofibrils in a parallel arrangement. A  
score of 2 represents cells that have intact myofibrils, but many are not parallel. Scores of 3 and  
532 of 4 include cells with increasing degrees of myofibrillar fragmentation or aggregation. A score  
of 5 represents cells without visible myofibrils. No cells were apparent among our samples with  
534 a score of 5. Violin plots were generated in Prism (GraphPad) to show distribution of scored  
cells from each group. Fisher's exact test was used to determine statistical significance.

536

**Cell harvesting for single cell RNAseq.** Cells from day 6, day 11 or day 23 of the  
538 differentiation protocol were collected from 3 independent differentiations. Wells for dissociation  
were chosen based on typical differentiated morphology on day 6 or robust beating on day 11  
540 and day 23. Cells were singularized with Trypsin-EDTA 0.25%. After quenching, the single cell  
suspension was centrifuged at 800 rpm for 5 minutes. The pellet was resuspended in 1X PBS  
542 with 0.04% w/v Ultrapure BSA (MCLAB #UBSA-500) and counted. A 30µL cell suspension  
containing 10,000 cells was used to generate single cell droplet libraries with the Chromium  
544 Single Cell 3' GEM, Library & Gel Bead Kit v2 according to manufacturer's instructions (10X  
Genomics). After KAPA qPCR quantification, a shallow sequencing run was performed on a  
546 NextSeq 500 (Illumina) prior to deep sequencing on a NextSeq 500, HiSeq 4000, or NovaSeq  
(Illumina) for a read depth of >100 million reads per cell.

548

**Data processing using Cellranger.** All datasets were processed using Cellranger 2.0.2.  
550 FASTQ files were generated using the mkfastq function. Reads were aligned to hg19 reference  
(version 1.2.0). Cellranger aggr was used to aggregate multiple GEM libraries.

552

**Seurat analysis.** Outputs from the Cellranger pipeline were analyzed using the Seurat package  
554 (version 2.3.4) in R (version 3.5.1) [R Core Team (2018). R: A language and environment for  
statistical computing. R Foundation for Statistical Computing, Vienna, Austria.  
556 URL <https://www.R-project.org/>]. Datasets from day 6, day 11 or day 23 experiments were  
analyzed as separate Seurat objects. Quality control steps were performed to remove dead  
558 cells or doublets, and cells with a UMI count between 10,000 to 80,000 were retained. After  
normalizing the data, sources of unwanted variation, such as differences in the number of UMI,  
560 number of genes, percentage of mitochondrial reads and differences between G2M and S  
phase scores were regressed using the ScaleData function. Next, principal component analysis  
562 (PCA) was performed using the most highly variable genes. Cells were then clustered based on  
the top 25-30 principal components and visualized using a dimensionality reduction method  
564 called Uniform Manifold Approximation and Projection (UMAP) <sup>47</sup>. The resolution parameter was  
set, so that cluster boundaries separated the major cell types.

566 For day 11 or day 23 cardiomyocyte datasets, *TNNT2*<sup>+</sup> clusters were defined as  
containing a majority of cells expressing *TNNT2* on a feature plot and extracted using the  
568 SubsetData function and re-clustered. Subsequently, the resolution parameter was set to  
partition clusters enriched for a particular genotype. A phylogenetic tree was generated by  
570 relating the “average” cell from each cluster by centroid analysis, using the BuildClusterTree  
function. Differential gene expression tests were run between closely related clusters, using the  
572 FindMarkers function with min.pct set to 0.1 and logfc.threshold set to 0.25. Selected  
differentially expressed genes with an adjusted p-value less than 0.05 from the Wilcoxon Rank  
574 Sum test were then displayed using the Dotplot function. As Seurat log normalizes gene  
expression counts and scales values for each gene (mean is 0, std dev of +/-1), dot plots and  
576 heatmaps are based on scaled expression values.

Major cell type categories were defined by their expression of certain marker genes -  
578 cardiomyocytes (*TNNT2*), dividing cardiomyocytes (*CENPF*+*TNNT2*), fibroblasts (*COL1A1*),

endoderm (*TTR* alone or *TTR+AFP*) and endothelial cells (*PLVAP*). Clusters of cells not defined  
580 by any of these markers were labeled as 'Others'. The numbers of cells in each major cell type  
category in each genotype were then calculated. Sunburst plot was generated in Excel using  
582 the percentage of cells in each cell type category per genotype. We used FindAllMarkers to  
generate a list of top marker genes for each cluster and presented two selected genes in a dot  
584 plot to display potential diversity of subtypes among these major cell types.

586

**Congenital Heart Disease-Associated or Electrophysiology-Related Gene Lists and Cell-  
588 Type Expression.** A list of 376 CHD-associated candidate genes were manually curated from  
<sup>18-25</sup>, including inherited, *de novo*, syndromic or non-syndromic CHD-associated genes. A list of  
590 76 EP-linked genes were manually curated. A list of cardiac development-related factors is from  
<sup>48</sup>. Lists can be found in Supplementary Table 1.

592 To determine cell-type enrichment of each CHD-associated gene, cells in the day 23  
dataset were assigned one of five cell-type labels (cardiomyocytes, fibroblasts, endoderm,  
594 endothelial and others). A dot plot was generated to visualize the expression of CHD-associated  
genes in the 5 cell types. Genes were first manually curated for enrichment in a certain cell type,  
596 based on expression. Statistical significance of the enrichment of a certain gene in one cell type  
over the others was then evaluated by Wilcoxon Rank Sum test (adjusted p-value < 0.05).

598

**Cell trajectories and pseudotime analysis.** Pseudotime analysis was performed using the  
600 URD package (version 1.0.2). A single Seurat object with data from three timepoints and four  
genotypes was processed, as described in the previous section, and then converted to an URD  
602 object using the `seuratToURD` function. Cell-to-cell transition probabilities were constructed, by  
setting the number of nearest neighbors (*knn*) to 211 and *sigma* to 8. Pseudotime was then  
604 calculated by running 80 flood simulations with *POU5F1+* clusters as the 'root' cells. Next, all

day 23 clusters were set as 'tip' cells and biased random walks were simulated from each tip to  
606 build an URD tree.

To identify genes that correlate with pseudotime in one genotype but not the other, we  
608 calculated Spearman rank correlation, using Python (v3.7.3, and libraries Pandas 0.25.0,  
Numpy 1.17.1, and SciPy 1.3.1), to find genes that share a significant monotonic relationship (p-  
610 value less than 0.05) with pseudotime. To determine if these monotonic relationships differ  
between WT and *TBX5<sup>in/del</sup>* paths to cardiomyocytes, we used a Fisher z-transformation to test  
612 the null hypothesis that there is no significant difference in correlation<sup>49</sup>. To illustrate these  
results, we use a scatter plot for all genes with a significant rho value (p-value<0.05 by two-  
614 sided *t* test), or heat maps for genes with a  $|\rho| \geq 0.4$  to pseudotime and  $Z\text{-score} \geq 15$  as a  
difference between WT and *TBX5<sup>in/del</sup>* paths.ki

616 To identify differential expressed genes in inferred cardiac precursors (stems in the URD  
tree) that are affected by *TBX5* loss, cell barcodes from each precursor segment (69 for  
618 wildtype/control/*TBX5<sup>in/+</sup>* path and 70 for *TBX5<sup>in/del</sup>* path) were extracted from the URD object  
and assigned new identities in the corresponding Seurat object. Differential gene test was then  
620 performed between the two segments using Wilcoxon Rank Sum test with min.pct set to 0.1 and  
logfc.threshold set to 0.25. Selected genes with an adjusted p-value less than 0.05 were plotted  
622 on the URD tree to visualize their expression.

To compare the trident (*TNNT2<sup>+</sup>* distal branch for WTC11, control and *TBX5<sup>in/+</sup>*) and fork  
624 (*TNNT2<sup>+</sup>* distal branch for *TBX5<sup>in/del</sup>*) during pseudotime, we subdivided the pseudotime from the  
common branchpoint to the tips of the trident and fork into twenty uniform windows. Within each  
626 window, we then calculated the t-test, difference of means, and fold change between the trident  
and fork for all genes. We filtered the statistics by gene-window combinations with  $p < 0.05$  after  
628 Bonferroni-Holm multiple testing correction. Then, we hierarchically clustered the genes on t-  
test p-values and plotted statistics using the R pheatmap library.

630

**Gene ontology analysis.** Gene ontology analysis was performed using 2018 biological process  
632 terms from org.Hs.eg.db (v3.8.2) and clusterProfiler (v 3.12.0), with a significance threshold set  
at  $p\text{-value} < 0.05$ . To prevent high false discovery rate (FDR) in multiple testing, we used the  
634 default cutoff for the estimated  $q\text{-value} < 0.05$ . Figures were produced using Matplotlib (v3.1.0).  
Gene ratios indicate the number of differentially expressed genes that overlap with each GO  
636 term divided by the total number of differentially expressed genes. For comparing *TNNT2*<sup>+</sup>  
clusters at d23, enriched gene ontology (GO) terms were determined using genes computed  
638 from a one-versus rest differential test ( $\log_{2}fc > 0.25$ ; adj  $p\text{-value} < 0.05$  by Wilcoxon Rank Sum  
test) among clusters that were predominantly composed of the same *TBX5* genotype (WT-21,  
640 12, 3, and Control-4, or *TBX5*<sup>in/+</sup> - 9, 7, 6, and 0). Enriched GO terms associated with  
pseudotime in a WT- or *TBX5*<sup>in/del</sup> path were generated using genes positively correlated with  
642 pseudotime ( $\rho \geq |0.4|$ , and  $Z\text{-score} \geq 15$ ) from each path. Several significant GO terms are  
highlighted.

644  
**Cell browser implementation.** The cell browser at [cells.ucsc.edu](http://cells.ucsc.edu) was developed by Maximilian  
646 Haeussler. We created a cell browser session that allows the user to interrogate the spatial  
distribution of metadata and expression across data, in multiple reduced dimensionality spaces  
648 including the URD trajectory. Using a Scanpy python pipeline, we generated PCA, tSNE,  
UMAP, PAGA, and drl transforms. We also imported the URD trajectory mapping and WGCNA  
650 transform from their respective packages. We ran the scoreCT algorithm to assign cell types to  
cell clusters using a marker gene set.

652  
**Gene regulatory network analysis.** bigSCale2 (<https://github.com/iaconogi/bigSCale2>)<sup>30</sup> was  
654 used with default parameters to infer gene regulatory networks and “correlomes” from single cell  
RNAseq expression data for *TNNT2*<sup>+</sup> cells, simply passing as input expression counts and gene  
656 names. Details of each data set can be found in Supplementary Table 3. To evaluate significant

changes in pagerank (or degree) centrality, we computed all pairwise differential differences in  
658 pagerank (or degree) between baseline (wildtype or control) and *TBX5* mutants (*TBX5<sup>in/+</sup>* or  
*TBX5<sup>in/del</sup>*) (12 total differences, from 2 *TBX5* mutants \* 2 baselines \* 3 stages) and used these  
660 values to determine the top 5% upper change cutoff from 8,704 genes of all networks.

Classification of Pearson correlations were empirically chosen at >0.5 for correlation and <-0.05  
662 for anti-correlation.

**Mice.** All mouse protocols were approved by the Institutional Animal Care and Use Committee  
664 at UCSF. *Tbx5<sup>del/+</sup>*<sup>7</sup> and *Tbx5<sup>CreERT2IRES2xFLAG</sup>* (abbreviated here as *Tbx5<sup>CreERT2</sup>*)<sup>33</sup> mice were  
described previously. *Tbx5<sup>fl-bio/fl-bio50</sup>* mice were obtained from Frank Conlon. *Mef2c<sup>del/+</sup>* mice<sup>32</sup>  
666 were obtained from Brian Black. *Mef2a<sup>fl-bio</sup>* and *Mef2c<sup>fl-bio</sup>* (Jackson #025983) were described in  
<sup>34</sup>. *Rosa26BirA* mice were obtained from Jackson labs (Jackson #010920)<sup>51</sup>.

668 **ChIP-seq.** Combined peaks of human TBX5 or GATA4 ChIP-seq from hiPSC-derived CMs  
were used<sup>10</sup>. bioChIP-seq of mouse TBX5, MEF2c and MEF2a from E12.5 hearts were from<sup>34</sup>.  
670 Single replicates of TF bioChIP peaks, which were IDR normalized (IDR\_THRESHOLD=0.05  
between each set of replicates), were defined as the summit of the peak with the strongest ChIP  
672 signal  $\pm$  100bp of the individual replicate with the greatest peak intensity. Mouse H3K27ac  
ChIP-seq at E12.5 of embryonic cardiac ventricles was from<sup>52</sup>.

674 **Bulk RNAseq analysis of embryonic mouse hearts.** Embryos at E10.5 from timed matings of  
*Tbx5<sup>del/+</sup>* x *Tbx5<sup>CreERT2/+</sup>* were harvested. Each whole heart was dissected, placed in Qiazol, and  
676 homogenized with a 25-gauge needle. Total RNA was extracted using the miRNeasy micro kit  
with on-column DNase digestion (Qiagen) and assessed by bioanalyzer (Agilent) for RNA  
678 integrity, as previously described<sup>53</sup>. Four individual hearts of each genotype (wildtype,  
*Tbx5<sup>CreERT2/+</sup>*, *Tbx5<sup>del/+</sup>* or *Tbx5<sup>del/CreERT2</sup>*) from multiple litters were used as biological  
680 quadruplicates. RNAseq libraries were generated using the Ovation RNA-seq system V2 kit



(NuGen), and SPIA-amplified cDNA was made using the Ovation Ultralow System V2 kit (NuGen).  
682 Libraries were evaluated by bioanalyzer (Agilent), quantified using KAPA qPCR (Kapa  
Biosystems), and sequenced by paired-end 100 bp reads using a HiSeq2500 (Illumina), for a  
684 sequencing depth of >40 million reads per library. Reads were aligned to mm9 by TopHat2<sup>54</sup>  
and counts per gene were tallied by featureCounts<sup>55</sup>. Differentially expressed genes were  
686 identified by EdgeR<sup>56</sup>, using cutoffs of log2 fold-change of >0.5 or <-0.5, and raw p-value <0.01.  
R functions, K-means clustering and pheatmap, were used to cluster and create bulk RNAseq  
688 heatmaps.

690 **Statistical analyses for correlations.** We evaluated the pair-wise association among 24  
variables, including all human genes, TBX5-dysregulated genes in cardiomyocytes from two  
692 different stages of differentiation (d11 or d23), CHD-associated genes, EP-linked genes, TBX5  
or GATA4 binding<sup>10</sup>, and genome-wide association (GWAS) genes for CHDs or arrhythmias.  
694 Reported GWAS genes from <https://www.ebi.ac.uk/gwas/> for the terms congenital heart  
disease, congenital heart malformation, congenital left sided heart lesions, conotruncal heart  
696 defect and aortic coarctation were used to define congenital heart disease-related (CHD) GWAS  
genes. Reported genes from terms such as cardiac arrhythmia, supraventricular ectopy,  
698 ventricular ectopy, premature cardiac contractions, atrial fibrillation, sudden cardiac arrest and  
ventricular fibrillation were considered as arrhythmia-related (EP-GWAS) genes. Two nearest  
700 genes within 100kb, by using GREAT (great.stanford.edu), of TBX5 or GATA4 binding sites or  
of reported genes from each group of GWAS were considered for the analysis. The natural  
702 logarithm odds of genes associating with each one of these variables versus the odds of genes  
associating with every other variable were estimated using generalized linear models with  
704 family="binomial" setting in R. The resulting significances of these natural log odds ratios were  
adjusted for multiple testing by the Benjamini-Hochberg method<sup>57</sup>. Significance was determined  
706 using an FDR threshold of 0.05 or less.



Additional correlations were evaluated between 42 variables, including all mouse genes,  
708 mouse TBX5-dysregulated genes (from bulk RNAseq of E10.5 hearts from wildtype, *Tbx5<sup>del/+</sup>*,  
*Tbx5<sup>CreERT2/+</sup>* or *Tbx5<sup>CreERT2/del</sup>* embryos), human TBX5-dysregulated genes from d11 or d23  
710 cardiomyocytes, and TBX5, MEF2c or MEF2a binding sites from E12.5 mouse heart tissue <sup>34</sup>.  
Human gene symbols were converted to mouse gene symbols, using the getLDS() function  
712 from the biomaRt package (<https://www.r-bloggers.com/converting-mouse-to-human-gene-names-with-biomart-package/>). Two nearest genes within 100kb of TBX5, MEF2c or MEF2a  
714 binding sites were considered for the analysis.

For assessment of associations between binding locations of TBX5, MEF2c and MEF2a  
716 transcription factors with genes dysregulated by TBX5, analyses were performed corresponding  
to binding regions of each of the three TFs. First, binding regions of each TF was evaluated for  
718 association with genes, defined by nearest two genes within 100kb. Using the list of TBX5-  
dysregulated genes (mouse or human), binding regions of each TF associated with a TBX5-  
720 dysregulated gene was determined. Identified binding regions of each TF that overlapped with  
at least 50% of the binding regions of each of the other two TFs was determined, using bedops -  
722 -element-of -50%. This approach defined three variables, including every binding region of the  
TF, if associated with a TBX5-dysregulated gene, or if it overlaps by at least 50% with the  
724 binding region of the other TFs, that were used for logistic regression in R. The resulting  
changes in odds are represented as natural logarithm odds ratios. Multiple testing correction  
726 was performed using the multtest package in R. All estimates are based on analyses for a given  
species (mouse or human TBX5-dysregulated).

728 **Data availability.** scRNAseq and bulk RNAseq datasets have been deposited at NCBI GEO,  
under accession GSE137876.

730 **Code availability.** R and python scripts will be available upon publication.

732 **References.**

1. Zaidi, S. & Brueckner, M. Genetics and Genomics of Congenital Heart Disease. *Circ Res* **120**, 923–940 (2017).  
734
2. Hill, J. T., Demarest, B., Gorski, B., Smith, M. & Yost, H. J. Heart morphogenesis gene regulatory networks revealed by temporal expression analysis. *Development* **144**, 3487–3498 (2017).  
736
3. Hoffman, J. I. Incidence of congenital heart disease: II. Prenatal incidence. *Pediatr Cardiol* **16**, 155–165 (1995).  
738
4. Hoffman, J. I. E. & Kaplan, S. The incidence of congenital heart disease. *J Am Coll Cardiol* **39**, 1890–1900 (2002).  
740
5. Basson, C. T. *et al.* Mutations in human TBX5 [corrected] cause limb and cardiac malformation in Holt-Oram syndrome. *Nat Genet* **15**, 30–35 (1997).  
742
6. Li, Q. Y. *et al.* Holt-Oram syndrome is caused by mutations in TBX5, a member of the Brachyury (T) gene family. *Nat Genet* **15**, 21–29 (1997).  
744
7. Bruneau, B. G. *et al.* A murine model of Holt-Oram syndrome defines roles of the T-box transcription factor Tbx5 in cardiogenesis and disease. **106**, 709–721 (2001).  
746
8. Mori, A. D. *et al.* Tbx5-dependent rheostatic control of cardiac gene expression and morphogenesis. **297**, 566–586 (2006).  
748
9. Theodoris, C. V. *et al.* Human disease modeling reveals integrated transcriptional and epigenetic mechanisms of NOTCH1 haploinsufficiency. *Cell* **160**, 1072–1086  
750 (2015).  
752
10. Ang, Y.-S. *et al.* Disease Model of GATA4 Mutation Reveals Transcription Factor Cooperativity in Human Cardiogenesis. *Cell* **167**, 1734–1749.e22 (2016).  
754
11. Gifford, C. A. *et al.* Oligogenic inheritance of a human heart disease involving a genetic modifier. *Science* **364**, 865–870 (2019).  
756

12. Holm, S. A simple sequentially rejective multiple test procedure. *Scandinavian Journal of Statistics* **6**, 65–70 (1979).  
758
13. Karakikes, I. *et al.* A Comprehensive TALEN-Based Knockout Library for Generating Human-Induced Pluripotent Stem Cell-Based Models for Cardiovascular Diseases. *Circ Res* **120**, 1561–1571 (2017).  
760
14. Nadadur, R. D. *et al.* Pitx2 modulates a Tbx5-dependent gene regulatory network to maintain atrial rhythm. *Science Translational Medicine* **8**, 354ra115–354ra115 (2016).  
762  
764
15. Dai, W. *et al.* A calcium transport mechanism for atrial fibrillation in Tbx5-mutant mice. *eLife* **8**, 40 (2019).  
766
16. Laforest, B. *et al.* Atrial fibrillation risk loci interact to modulate Ca<sup>2+</sup>-dependent atrial rhythm homeostasis. *J Clin Invest* **412**, 1825–15 (2019).  
768
17. Zhu, Y. *et al.* Tbx5-dependent pathway regulating diastolic function in congenital heart disease. *Proceedings of the National Academy of Sciences* **105**, 5519–5524 (2008).  
770
18. McCulley, D. J. & Black, B. L. Transcription factor pathways and congenital heart disease. *Curr. Top. Dev. Biol.* **100**, 253–277 (2012).  
772
19. Zaidi, S. *et al.* De novo mutations in histone-modifying genes in congenital heart disease. **498**, 220–223 (2013).  
774
20. Prendiville, T., Jay, P. Y. & Pu, W. T. Insights into the genetic structure of congenital heart disease from human and murine studies on monogenic disorders. *Cold Spring Harb Perspect Med* **4**, a013946–a013946 (2014).  
776  
778
21. Lalani, S. R. & Belmont, J. W. Genetic basis of congenital cardiovascular malformations. *Eur J Med Genet* **57**, 402–413 (2014).  
780

22. Homsy, J. *et al.* De novo mutations in congenital heart disease with  
782 neurodevelopmental and other congenital anomalies. *Science* **350**, 1262–1266  
(2015).
- 784 23. Sifrim, A. *et al.* Distinct genetic architectures for syndromic and nonsyndromic  
congenital heart defects identified by exome sequencing. *Nat Genet* **48**, 1060–1065  
786 (2016).
24. Priest, J. R. *et al.* De Novo and Rare Variants at Multiple Loci Support the  
788 Oligogenic Origins of Atrioventricular Septal Heart Defects. *PLoS Genet* **12**,  
e1005963–25 (2016).
- 790 25. Jin, S. C. *et al.* Contribution of rare inherited and de novo variants in 2,871  
congenital heart disease probands. *Nat Genet* **49**, 1593–1601 (2017).
- 792 26. Farrell, J. A. *et al.* Single-cell reconstruction of developmental trajectories during  
zebrafish embryogenesis. *Science* **108**, eaar3131–9 (2018).
- 794 27. Hiroi, Y. *et al.* Tbx5 associates with Nkx2-5 and synergistically promotes  
cardiomyocyte differentiation. *Nat Genet* **28**, 276–280 (2001).
- 796 28. Luna-Zurita, L. *et al.* Complex Interdependence Regulates Heterotypic  
Transcription Factor Distribution and Coordinates Cardiogenesis. *Cell* **164**, 999–  
798 1014 (2016).
29. Garg, V. *et al.* GATA4 mutations cause human congenital heart defects and reveal  
800 an interaction with TBX5. **424**, 443–447 (2003).
30. Iacono, G., Massoni-Badosa, R. & Heyn, H. Single-cell transcriptomics unveils gene  
802 regulatory network plasticity. 1–20 (2019). doi:10.1186/s13059-019-1713-4
31. Brin, S. & Page, L. The anatomy of a large-scale hypertextual Web search engine.  
804 *Computer Networks and Isdn Systems* **30**, 107–117 (1998).

32. Lin, Q., Schwarz, J., Bucana, C. & Olson, E. N. Control of mouse cardiac  
806 morphogenesis and myogenesis by transcription factor MEF2C. *Science* **276**,  
1404–1407 (1997).
- 808 33. Devine, W. P., Wythe, J. D., George, M., Koshiba-Takeuchi, K. & Bruneau, B. G.  
Early patterning and specification of cardiac progenitors in gastrulating mesoderm.  
810 *eLife* **3**, (2014).
34. Akerberg, B. N. *et al.* A reference map of murine cardiac transcription factor  
812 chromatin occupancy identifies dynamic and conserved enhancers. *Nat Commun*  
**10**, 4907 (2019).
- 814 35. Stathopoulos, A. & Levine, M. Dorsal Gradient Networks in the Drosophila Embryo.  
**246**, 57–67 (2002).
- 816 36. Cong, L. *et al.* Multiplex Genome Engineering Using CRISPR/Cas Systems.  
*Science* **339**, 819–823 (2013).
- 818 37. Miyaoka, Y. *et al.* Isolation of single-base genome-edited human iPS cells without  
antibiotic selection. *Nat Meth* **11**, 291–293 (2014).
- 820 38. Mandegar, M. A. *et al.* CRISPR Interference Efficiently Induces Specific and  
Reversible Gene Silencing in Human iPSCs. *Stem Cell* **18**, 541–553 (2016).
- 822 39. Nora, E. P. *et al.* Targeted Degradation of CTCF Decouples Local Insulation of  
Chromosome Domains from Genomic Compartmentalization. *Cell* **169**, 930–  
824 933.e22 (2017).
40. Lee, J.-H. *et al.* A Robust Approach to Identifying Tissue-Specific Gene Expression  
826 Regulatory Variants Using Personalized Human Induced Pluripotent Stem Cells.  
*PLoS Genet* **5**, e1000718–15 (2009).
- 828 41. Byrne, S. M. & Church, G. M. Crispr-mediated Gene Targeting of Human Induced  
Pluripotent Stem Cells. *Current protocols in stem cell biology* **35**, 5A.8.1–22 (2015).

- 830 42. Peters, D. T., Cowan, C. A. & Musunuru, K. *Genome editing in human pluripotent stem cells*. (Harvard Stem Cell Institute, 2008).
- 832 43. Spencer, C. I. *et al.* Calcium Transients Closely Reflect Prolonged Action Potentials in iPSC Models of Inherited Cardiac Arrhythmia. *Stem Cell Reports* 1–13 (2014).  
834 doi:10.1016/j.stemcr.2014.06.003
44. Hookway, T. A. *et al.* Phenotypic Variation Between Stromal Cells Differentially  
836 Impacts Engineered Cardiac Tissue Function. *Tissue Engineering Part A* **25**, 773–785 (2019).
- 838 45. Abramoff, M. D., Magalhães, P. J. & Ram, S. J. *Image processing with ImageJ*. 36–42 (Biophotonics International, 2004).
- 840 46. Judge, L. M. *et al.* A BAG3 chaperone complex maintains cardiomyocyte function during proteotoxic stress. *JCI Insight* **2**, 83–18 (2017).
- 842 47. Becht, E. *et al.* Dimensionality reduction for visualizing single-cell data using UMAP. *Nat Biotechnol* **37**, 38–44 (2018).
- 844 48. Duan, J. *et al.* Rational Reprogramming of Cellular States by Combinatorial Perturbation. *CellReports* **27**, 3486–3499.e6 (2019).
- 846 49. Fisher, R. A. On the ‘Probable Error’ of a Coefficient of Correlation Deduced from a Small Sample. *Metron* **1**, 3–32 (1921).
- 848 50. Waldron, L. *et al.* The Cardiac TBX5 Interactome Reveals a Chromatin Remodeling Network Essential for Cardiac Septation. *Dev Cell* **36**, 262–275 (2016).
- 850 51. Driegen, S. *et al.* A generic tool for biotinylation of tagged proteins in transgenic mice. *Transgenic Res* **14**, 477–482 (2005).
- 852 52. He, A. *et al.* Dynamic GATA4 enhancers shape the chromatin landscape central to heart development and disease. *Nat Commun* **5**, 4907 (2014).

- 854 53. Hota, S. K. *et al.* Dynamic BAF chromatin remodeling complex subunit inclusion  
promotes temporally distinct gene expression programs in cardiogenesis.  
856 *Development* **146**, dev174086–21 (2019).
54. Kim, D. *et al.* TopHat2: accurate alignment of transcriptomes in the presence of  
858 insertions, deletions and gene fusions. *Genome Biol* **14**, R36–13 (2013).
55. Liao, Y., Smyth, G. K. & Shi, W. featureCounts: an efficient general purpose  
860 program for assigning sequence reads to genomic features. *Bioinformatics* **30**,  
923–930 (2014).
- 862 56. Robinson, M. D., McCarthy, D. J. & Smyth, G. K. edgeR: a Bioconductor package  
for differential expression analysis of digital gene expression data. *Bioinformatics*  
864 **26**, 139–140 (2009).
57. Benjamini, Y. & Hochberg, Y. Controlling the False Discovery Rate - a Practical and  
866 Powerful Approach to Multiple Testing. *Journal of the Royal Statistical Society*  
*Series B-Statistical Methodology* **57**, 289–300 (1995).
- 868



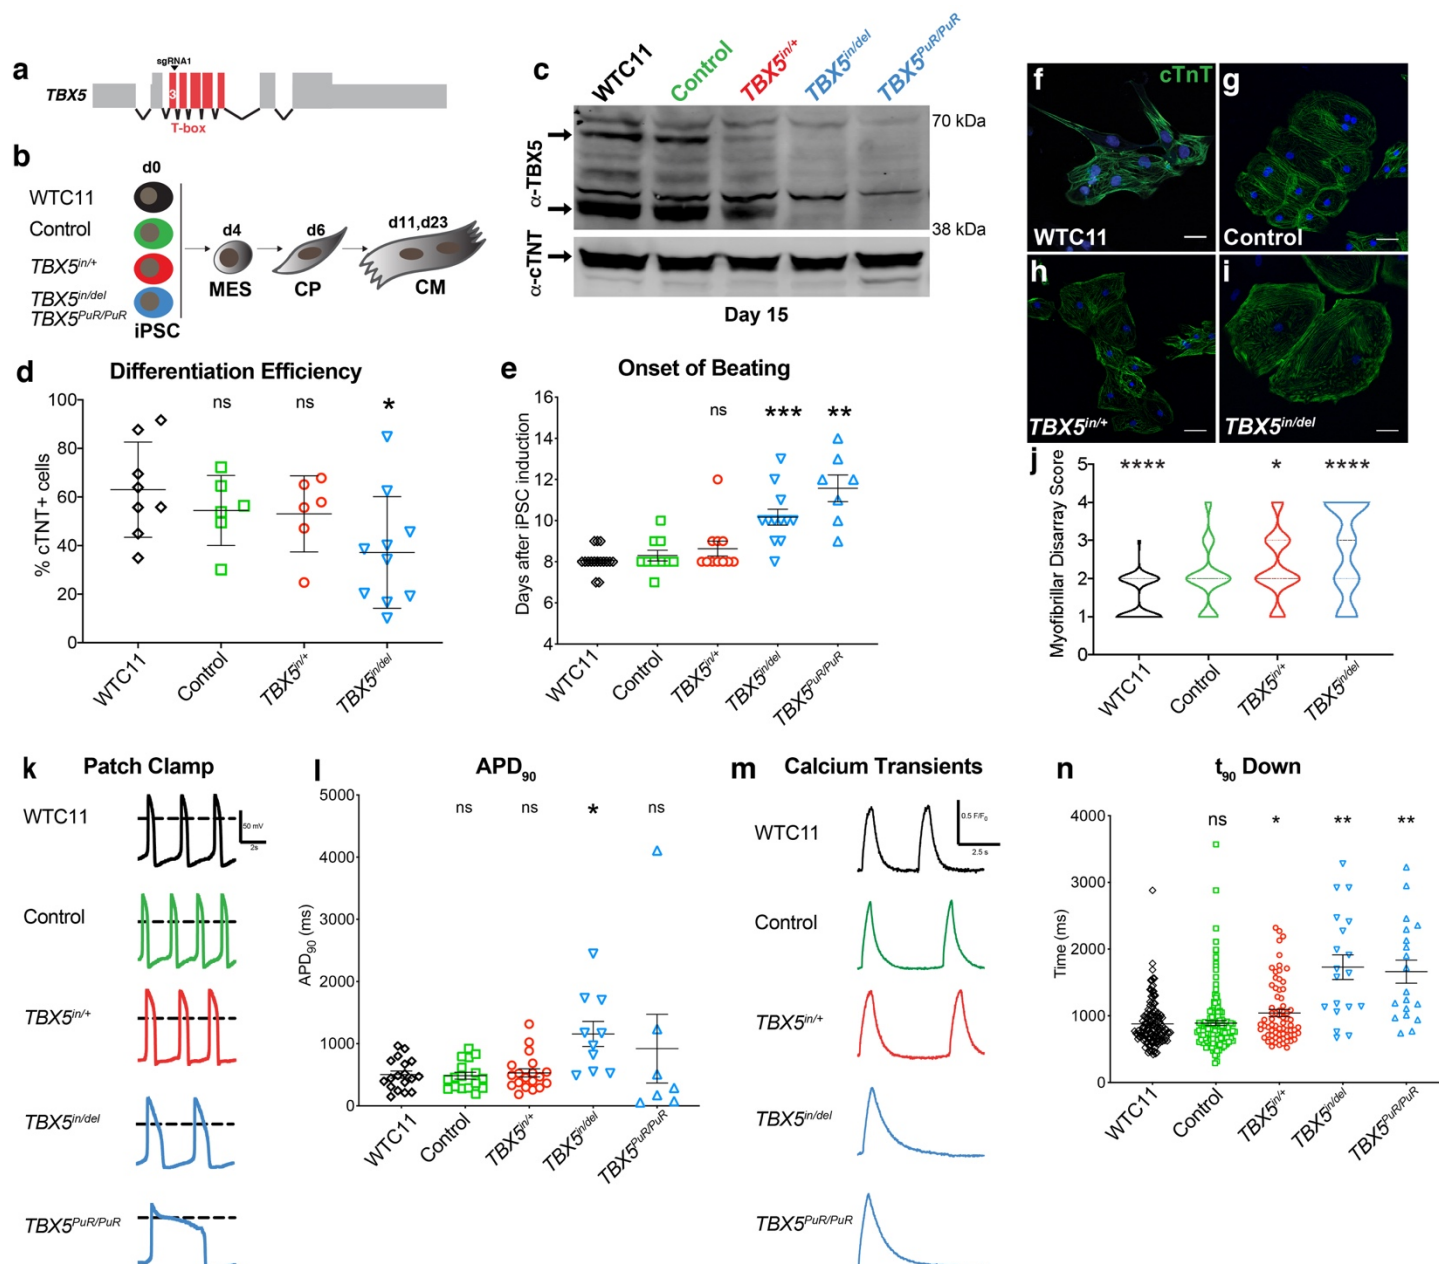

870

872

874 **Figure 1. A human allelic series of *TBX5* mutants models features of congenital heart**

876 **disease.** **a**, Diagram of the human *TBX5* gene. Exons encoding the T-box domain of *TBX5* are

878 indicated in red. sgRNA1 was used to target exon 3 of *TBX5* by a CRISPR/Cas9 nuclease. **b**,

880 Parental iPS cell line WTC11, control (CRISPR-treated, unmodified at exon 3 of *TBX5*) and

882 targeted *TBX5* loss-of-function mutants (*TBX5*<sup>in/+</sup>, *TBX5*<sup>in/del</sup>, or *TBX5*<sup>PuR/PuR</sup>) underwent directed

differentiation to cardiomyocytes (CM) via mesoderm (MES) and cardiac precursor (CP) stages.

**c**, *TBX5* and cTNT protein expression for each *TBX5* genotype at day 15 (CMs). **d**,

Differentiation efficiency by flow cytometry for cTNT<sup>+</sup> cells (\* p-value<0.05 by unpaired *t* test). **e**,

Onset of beating (\*\* p-value<0.01, \*\*\* p-value<0.001 by unpaired *t* test). **f-j**, Myofibrillar

arrangement of cardiomyocytes (\* p-value<0.05, \*\*\*\* p-value<0.0001 by Fisher's exact test). **k**,



884 Action potentials by patch clamp of single beating cells for each *TBX5* genotype. **l**, Action  
885 potential duration at 90% (APD<sub>90</sub>) (\* FDR<0.05). **m-n**, Traces of calcium transients from single  
886 beating cells were analyzed, including time at 90% decay (t<sub>90</sub> down) (\* FDR<0.05, \*\*  
887 FDR<0.01). Error bars represent standard deviation (**d**, **e**) or standard error (**l**, **n**) of the mean.  
888



906 (below). **k**, Differential gene expression of inferred precursors for the cardiomyocyte branches  
908 (segments 69 vs. 70, dashed ovals) show several genes that display altered gene expression  
908 (adj p-value<0.05 by Wilcoxon Rank Sum test) along the WT or *TBX5<sup>in/del</sup>* path. Colored blocks  
910 below represent the predominant *TBX5* genotypes in each tip. **l**, Feature plots show a delayed  
910 onset of expression during pseudotime for *NKX2-5*, in addition to *ATP1A1* and *KIAA1462*.

912

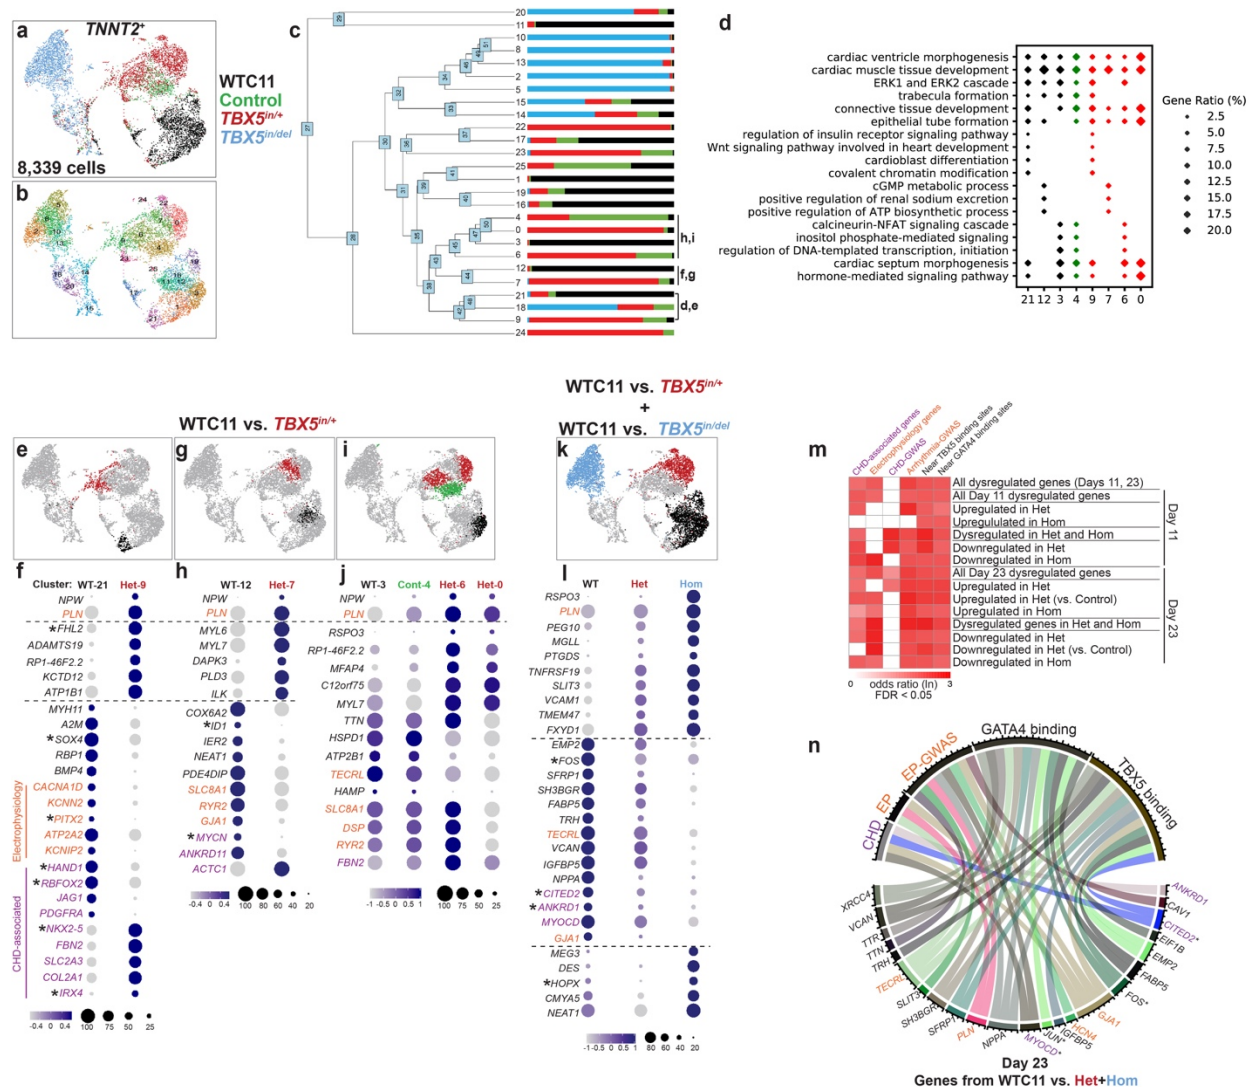

914

916

918

920

922

924

926

928

930

932

**Figure 3. Subsets of cardiomyocytes respond discretely by quantitative transcriptional perturbations to reduced *TBX5* dosage.** **a-c**, *TNNT2*<sup>+</sup> clusters from day 23 were re-clustered in Seurat. UMAP shows cells colored by *TBX5* genotype (**a**) or by cluster identity (**b**). **c**, Phylogenetic tree shows the relatedness of the ‘average’ cell per cluster among clusters. The proportion of cells in each cluster are colored by *TBX5* genotype. Pairs of related clusters between *TBX5* genotypes were selected for differential gene tests. **d**, Gene ontology for enriched biological processes (p-value<0.05 and q-value <0.05) in cell clusters, which are selected for differential gene expression (logfc>0.25 and adj p-value<0.05 by Wilcoxon Rank Sum test), are shown. **e**, **g**, **i**, UMAPs highlight clusters used for pair-wise comparisons for differential gene tests in corresponding dot plots below. **f**, **h**, Dot plots of top differentially expressed genes between wildtype-enriched cluster 21 and *TBX5*<sup>in/+</sup>-enriched cluster 9 (**f**), or between wildtype-enriched cluster 12 and *TBX5*<sup>in/+</sup>-enriched cluster 7 (**h**) (Supplementary Table 2). Each dot size corresponds to the percentage of cells expressing the gene in the cluster, and the color intensity represents scaled expression values in the cluster. Electrophysiology (EP)-related (orange) and congenital heart disease (CHD)-associated (purple) genes are highlighted. Asterisks denote transcription factors. Significance was determined by Wilcoxon Rank Sum test (adj p-value<0.05). **j**, The most differentially expressed genes in *TBX5*<sup>in/+</sup>-enriched clusters 0 and 6, when compared to both wildtype (WT)-enriched cluster 3 or control-enriched cluster 4,

934 are shown. **k**, **l**, UMAP highlights clusters for comparison (**k**) in dot plots of genes that are most  
936 differentially expressed in both *TBX5<sup>int+</sup>*- and *TBX5<sup>in/del</sup>*-enriched clusters, when compared to  
938 WT-enriched clusters (**l**). **m**, Heat map displays significant correlations (adj p-value<0.05 by  
940 Benjamini-Hochberg multiple corrections test) among comparisons of candidate lists for CHD-  
associated genes, EP-related genes, genome-wide association studies (GWAS) for CHDs or  
arrhythmias (Supplementary Table 4), and TBX5-dependent gene sets. **n**, Circular plot shows  
selected genes by category for WT-enriched vs. *TBX5<sup>int+</sup>*-enriched and WT-enriched vs.  
*TBX5<sup>in/del</sup>*-enriched clusters at day 23.

942

944



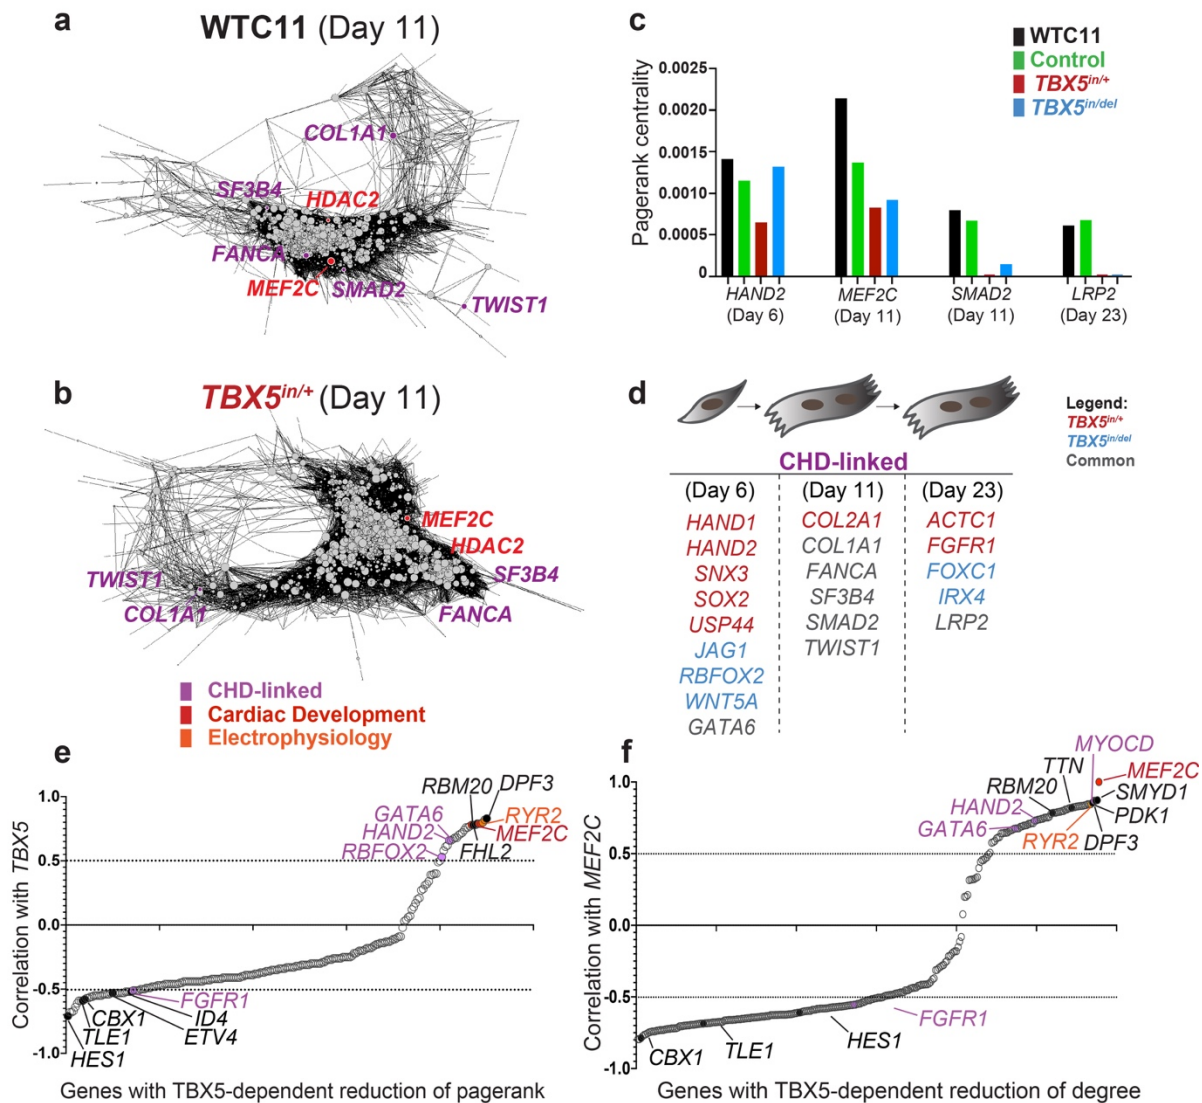

946

948

**Figure 4. *TBX5* dosage preserves cardiomyocyte network stability.** **a, b**, Gene regulatory networks (GRNs) for day 11 cardiomyocytes of WTC11 (**a**) or *TBX5*<sup>in/+</sup> (**b**) are shown. Nodes of CHD-related (purple), heart development (red) or electrophysiology (orange) genes are shown. The size of each node represents its quantitative importance, based on pagerank centrality. Note the absence of *SMAD2* and the reduced centrality of *MEF2C* (smaller circle) in the *TBX5*<sup>in/+</sup> network, compared to WTC11. **c**, Pagerank centrality for significantly altered (top 5% cutoff) nodes of CHD-associated or heart development genes at specific time points are shown. **d**, Twenty CHD-associated genes display a reduction in pagerank (top 5% cutoff) in at least one mutant *TBX5* genotype at any stage. This indicates enrichment of CHD-associated genes in *TBX5* dosage-sensitive networks ( $p < 2.2 \times 10^{-5}$  by hypergeometric test). **e**, *TBX5*-dependent genes with a reduction of pagerank are correlated (correlation  $> 0.5$ ), anti-correlated (correlation  $< -0.5$ ), or indeterminate ( $0.5 < \text{correlation} < -0.5$ ) with *TBX5* expression in *TNNT2*<sup>+</sup> cells. **f**, Correlations with *MEF2C* and *TBX5*-dependent genes with a reduction of degree in *TNNT2*<sup>+</sup> cells are plotted. Additional data can be found in Supplementary Table 3.

964

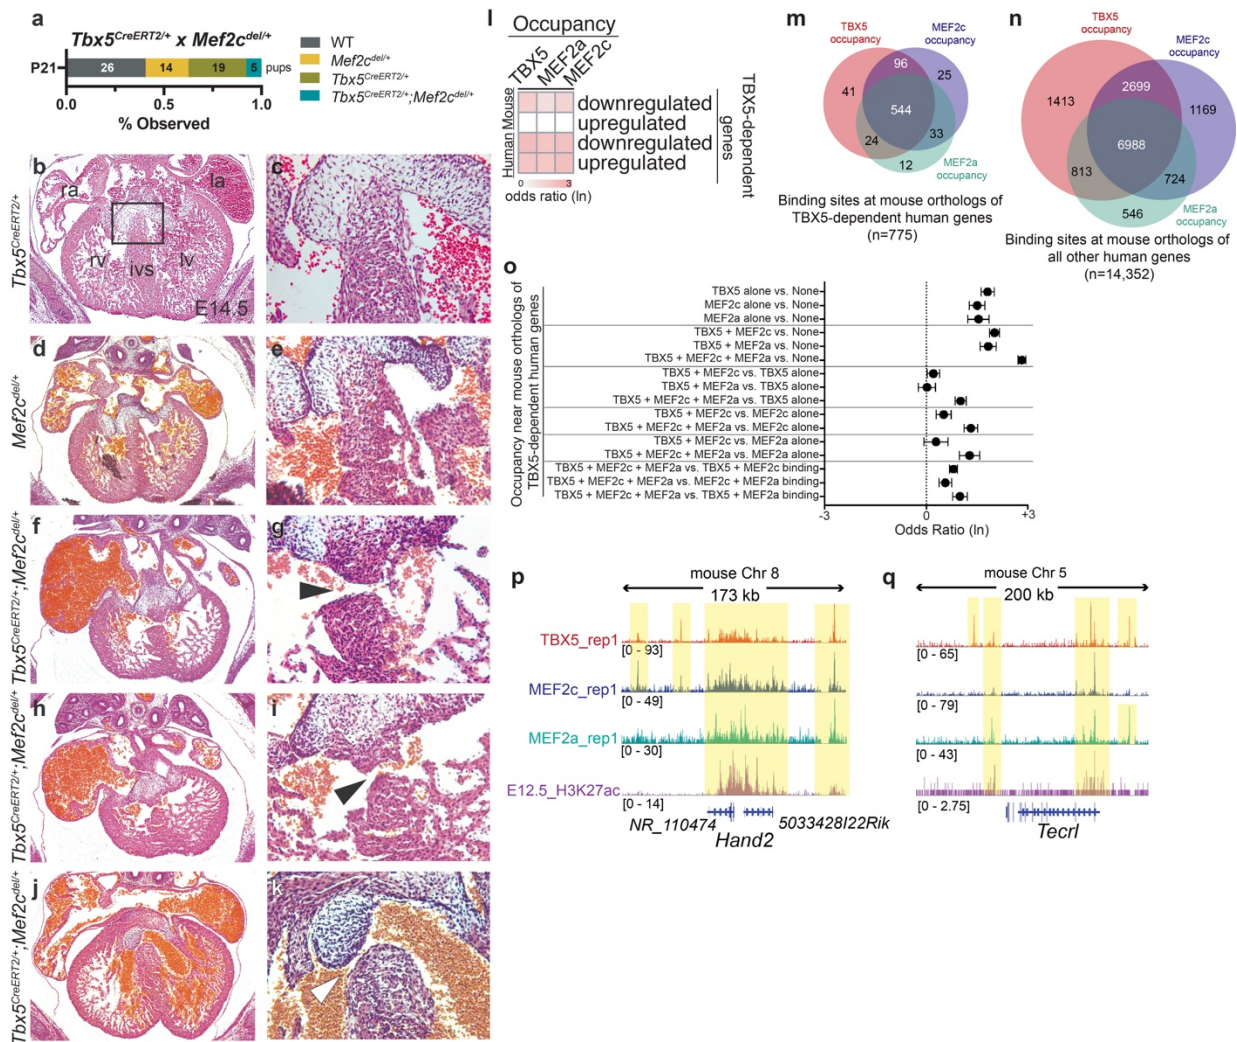

966

968 **Figure 5. *Tbx5* and *Mef2c* cooperate in heart development.** **a**, Pups at post-natal day 21  
 970 ( $P21$ ) from matings of  $Tbx5^{CreERT2/+} \times Mef2c^{del/+}$  were genotyped. Expected Mendelian ratios  
 972 were not observed for  $Tbx5^{CreERT2/+}; Mef2c^{del/+}$  at  $P21$ . **b, d, f, h, j**, Transverse sections of hearts  
 974 at embryonic day 14.5 ( $E14.5$ ) from each genotype are shown. **c, e, g, i, k**. Magnified views of  
 976 the interventricular septa are shown. Note muscular VSDs (black arrowheads in **g, i**), a  
 978 subaortic membranous VSD (**k**, white arrowhead) and dilated blood-filled atria in the  $Mef2c^{del/+};$   
 980  $Tbx5^{CreERT2/+}$  embryos (**f, h, j**). **l**, Heat map indicates odds ratios ( $FDR < 0.05$ ) of TBX5, MEF2a  
 982 or MEF2c occupancy near mouse or human TBX5-dependent genes (Supplementary Table 6).  
**m, n**, Venn diagrams display the overlap of TBX5, MEF2a or MEF2c occupancy near mouse  
 orthologs of human TBX5-dependent or -independent genes, respectively. **o**, Odds ratio  
 ( $FDR < 0.05$ ) of combinations of TBX5, MEF2a or MEF2c occupancy near mouse orthologs of  
 TBX5-dependent human genes (Supplementary Table 6). **p, q**, Browser tracks for CHIP-seq  
 data from  $E12.5$  hearts for TBX5, MEF2c, MEF2a and H3K27ac near conserved TBX5-  
 dependent genes, *Hand2* (**p**) or *Tec1l* (**q**). Yellow bands of shading indicate co-occupancy.

982



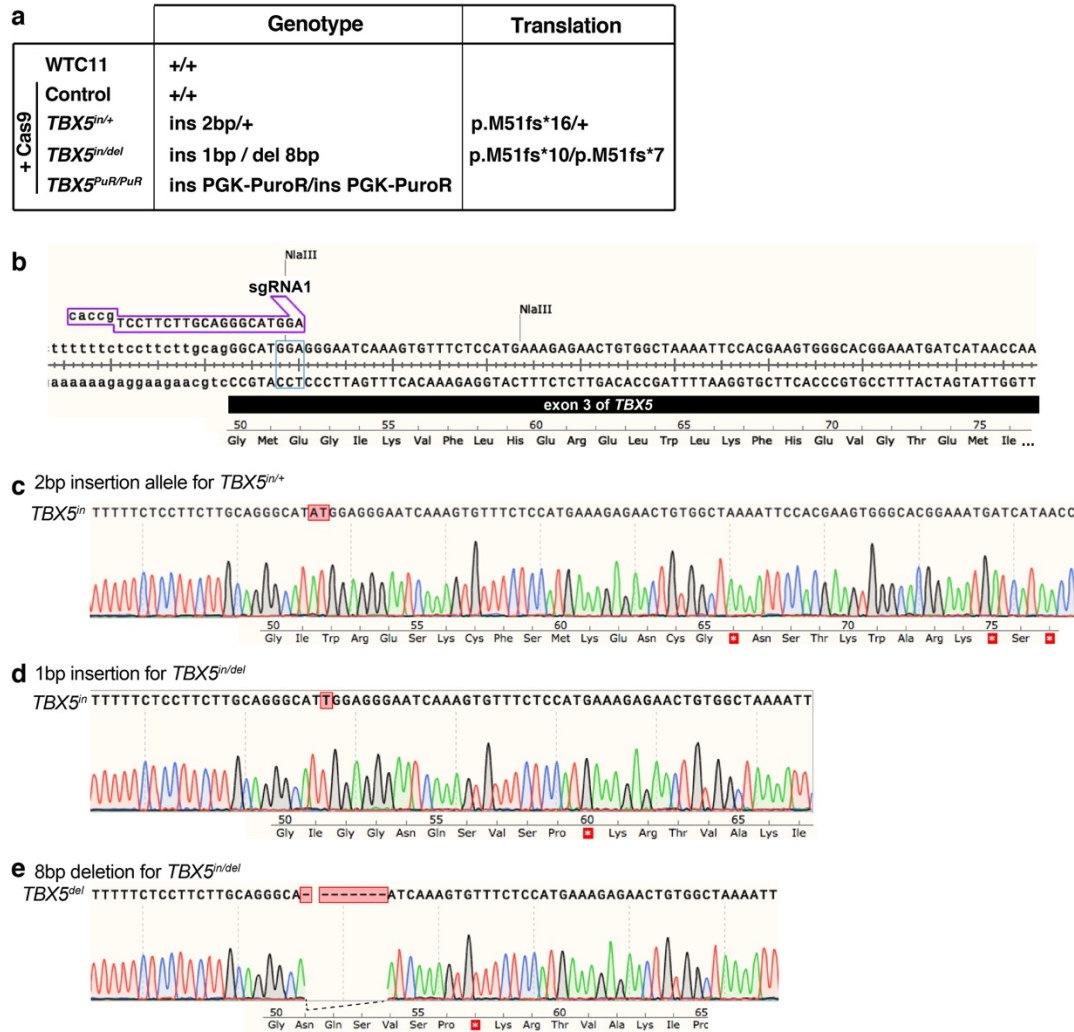

984

986 **Extended Data 1. Genotype information for targeted WTC11-derived iPS cells mutant for**  
***TBX5*.** **a**, Table shows genotypes of WTC11-derived iPS cell lines that were targeted for *TBX5*  
988 at exon 3. Predicted translation for each *TBX5* genotype is indicated. **b**, Sequence of the exon 3  
990 of *TBX5* is shown, along with the sgRNA1 location. The PAM site is boxed in blue. Loss of the  
992 NlaIII site at the PAM site was used in initial screening for mutant iPS cell clones by PCR. The  
994 encoded wildtype protein sequence includes the start of the T-box domain. **c**, Sequence and  
996 chromatogram for the 2bp insertion of the mutant allele for *TBX5*<sup>in/+</sup> predicts a premature  
truncation, as indicated by a stop codon (white asterisk in red box) in the frame-shifted protein  
sequence. **d**, **e**, Sequence and chromatogram for the 1 bp insertion, or 8 bp deletion,  
respectively, of the mutant allele for *TBX5*<sup>in/del</sup>, along with corresponding protein sequences, are  
shown.

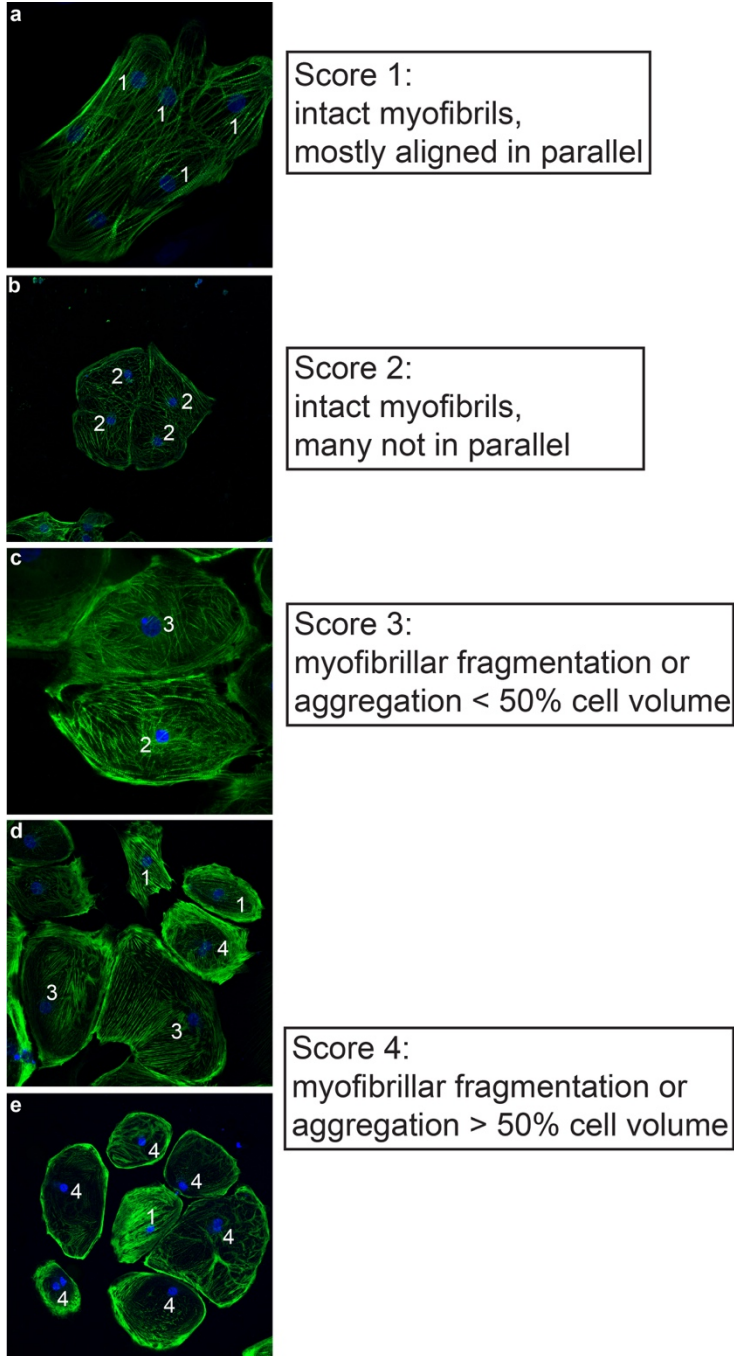

998 **Extended Data 2. Scoring criteria for myofibrillary disarray.** Criteria for scores 1-5 are  
1000 indicated, and representative images for each score are shown.

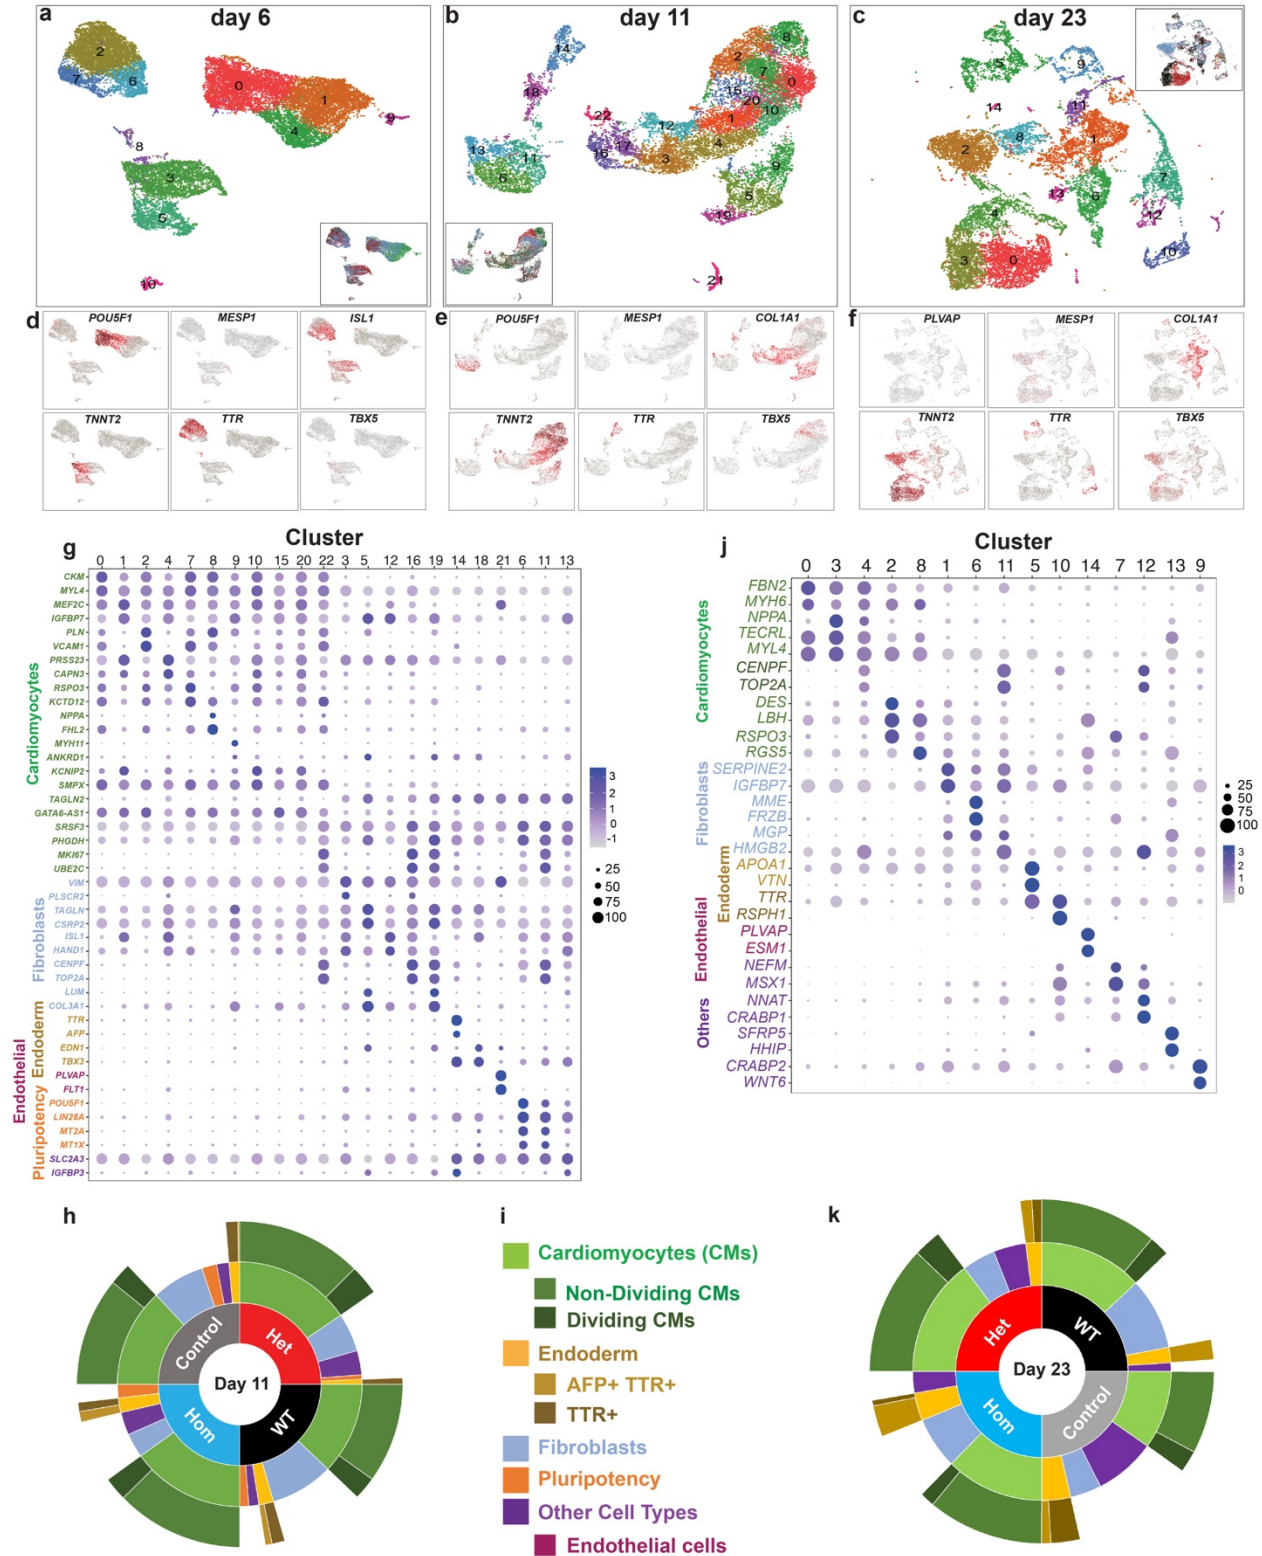

1002

1004

1006 **Extended Data 3. Human cardiac differentiation is sensitive to reduced TBX5 dosage. a-c,**  
1008 UMAPs display cells at day 6, day 11 and day 23, respectively, by Louvain clustering. Insets  
1010 show UMAPs colored by *TBX5* genotype. **d-f,** Feature plots in UMAP space demonstrate  
1012 expression of selected marker genes, which represent major cell types at each timepoint. **g, j,**  
1014 Dot plots display two of the top marker genes that are expressed in each cluster at day 11 or  
1016 day 23 (adj p-value<0.05 by Wilcoxon Rank Sum test), and define at least five major human cell  
types. The size of the dot corresponds to the percentage of cells expressing the gene in the  
cluster, and the color intensity represents the level of gene expression in the cluster. **h, i, k,**  
Sunburst plots indicate the proportion of at least five major cell types, based on top marker  
genes, by *TBX5* genotype at day 11 or day 23.



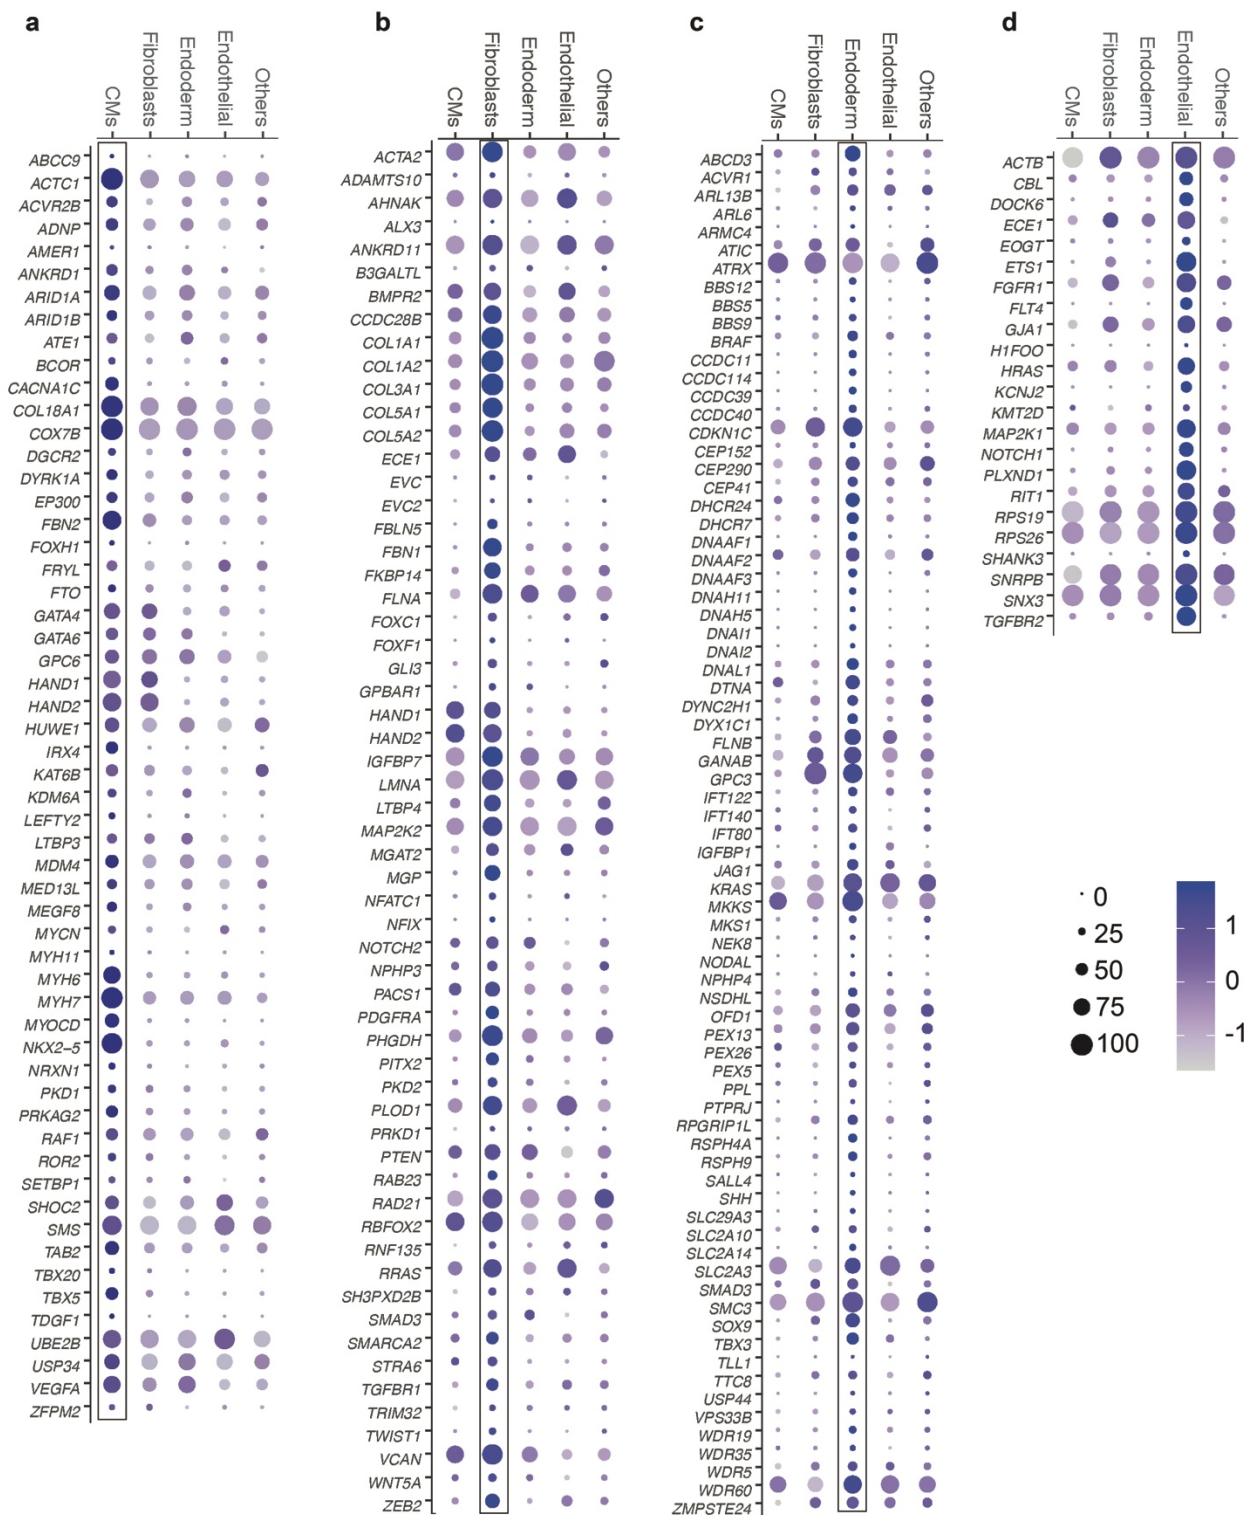

1018

1020

1022

**Extended Data 4. Many CHD-associated genes are enriched among several human cell types. a-d,** Dot plots show the expression of congenital heart disease (CHD)-associated genes that are significantly enriched in cardiomyocytes (**a**), fibroblasts (**b**), endodermal cells (**c**) or

1024 endothelial cells (**d**). Significance was determined by Wilcoxon Rank Sum test (adj p-  
value<0.05).

1026

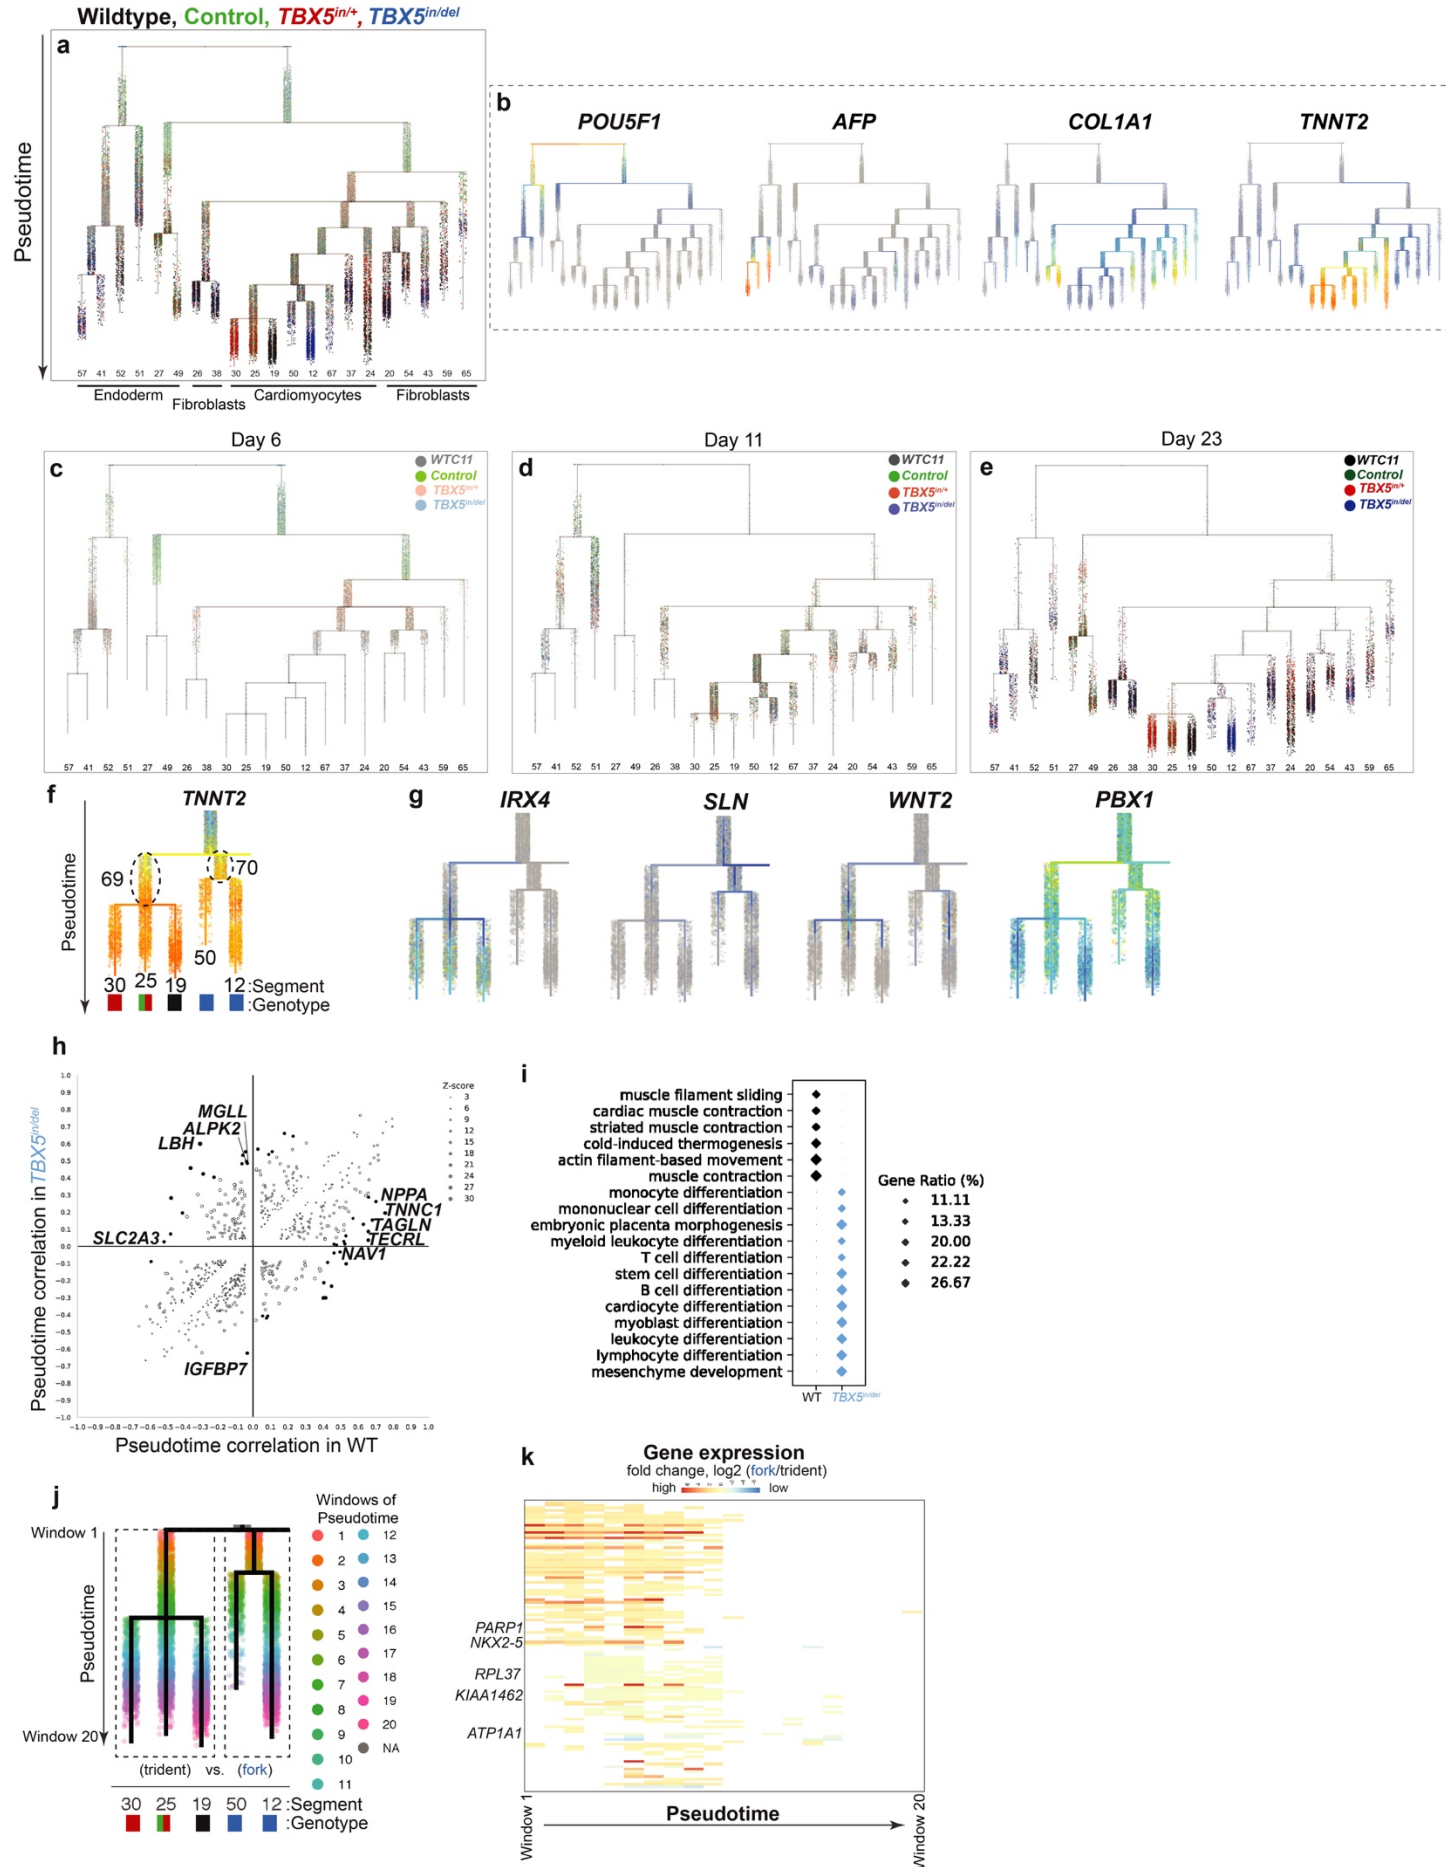



1028

**Extended Data 5. Pseudotime analysis of cell trajectory reconstructions by genotype,**

1030

**time point and cell type. a,** All cells for all *TBX5* genotypes and time points are shown for directed differentiation to cardiomyocytes in a single plot. Pseudotime is displayed from root

1032

(top) to tips (bottom). **b,** Genes, which mark each major cell type (pluripotent cell, endoderm, fibroblast and cardiomyocyte) during the directed differentiation, are shown. **c-e,** Cells from all

1034

*TBX5* genotypes are shown by time point. **f,** Differential gene expression between inferred precursors (dashed ovals, segments 69 vs. 70) of the WT or *TBX5<sup>in/del</sup>* path was evaluated. **g,**

1036

Delayed activation of *WNT2*, *PBX1* and *NKX2-5* in the *TBX5<sup>in/del</sup>* path (to segments 50 and 12) diverged from the path of other genotypes (to segments 20, 25, 19). *IRX4* was absent in the

1038

*TBX5<sup>in/del</sup>* path, and instead, *SLN* was enriched. Significance was determined by Wilcoxon Rank Sum test (adj p-value<0.05). **h,** Scatter plot displays two axes of Spearman rho correlations,

1040

which measure a potential relationship between gene expression and pseudotime for WT or *TBX5<sup>in/del</sup>* cell. Each white circle represents a gene that has a significant rho correlation with

1042

pseudotime (p-value<0.05 by two-sided *t* test). Size of the circle represents a Z-score difference for rho correlation of a gene to pseudotime for WT versus *TBX5<sup>in/del</sup>* path. As the size of the

1044

circle increases, there is a larger difference in how a gene is correlated with pseudotime

1046

between the two genotypes. Black circles represent genes with a moderate correlation or better with pseudotime in either path ( $|\rho| \geq 0.4$ ) and ( $Z\text{-score} \geq 15$ ), when the opposing genotype has

1048

no significant correlation to pseudotime (p-value $\geq 0.05$  by two-sided *t* test). **i,** Gene ontology (GO) terms for enriched biological processes (p-value<0.05 and q-value<0.05), which are based

1050

on genes that positively correlate with pseudotime ( $|\rho| \geq 0.4$  and  $Z\text{-score} \geq 15$  by difference in rho) in the WT- or the *TBX5<sup>in/del</sup>* path, are shown. Black (WT) or blue (*TBX5<sup>in/del</sup>*) diamonds show gene ratios. **j,**

1052

Deduced paths for WT/control/ *TBX5<sup>in/+</sup>* (trident) or *TBX5<sup>in/del</sup>* (fork) to

1054

cardiomyocytes were divided into windows (1-20) along pseudotime for comparison. **k,** Heat map shows fold change for genes in a cluster that includes *NKX2-5*, which was significantly

1056

different after correction (adj p-value<0.05 by Bonferroni-Holm test) in windows 2 through 8, along with genes of a similar pattern, including *PARP1*, *RPL37*, *KIAA1462*, and *ATP1A1* (adj p-value<0.05 by Bonferroni-Holm test).

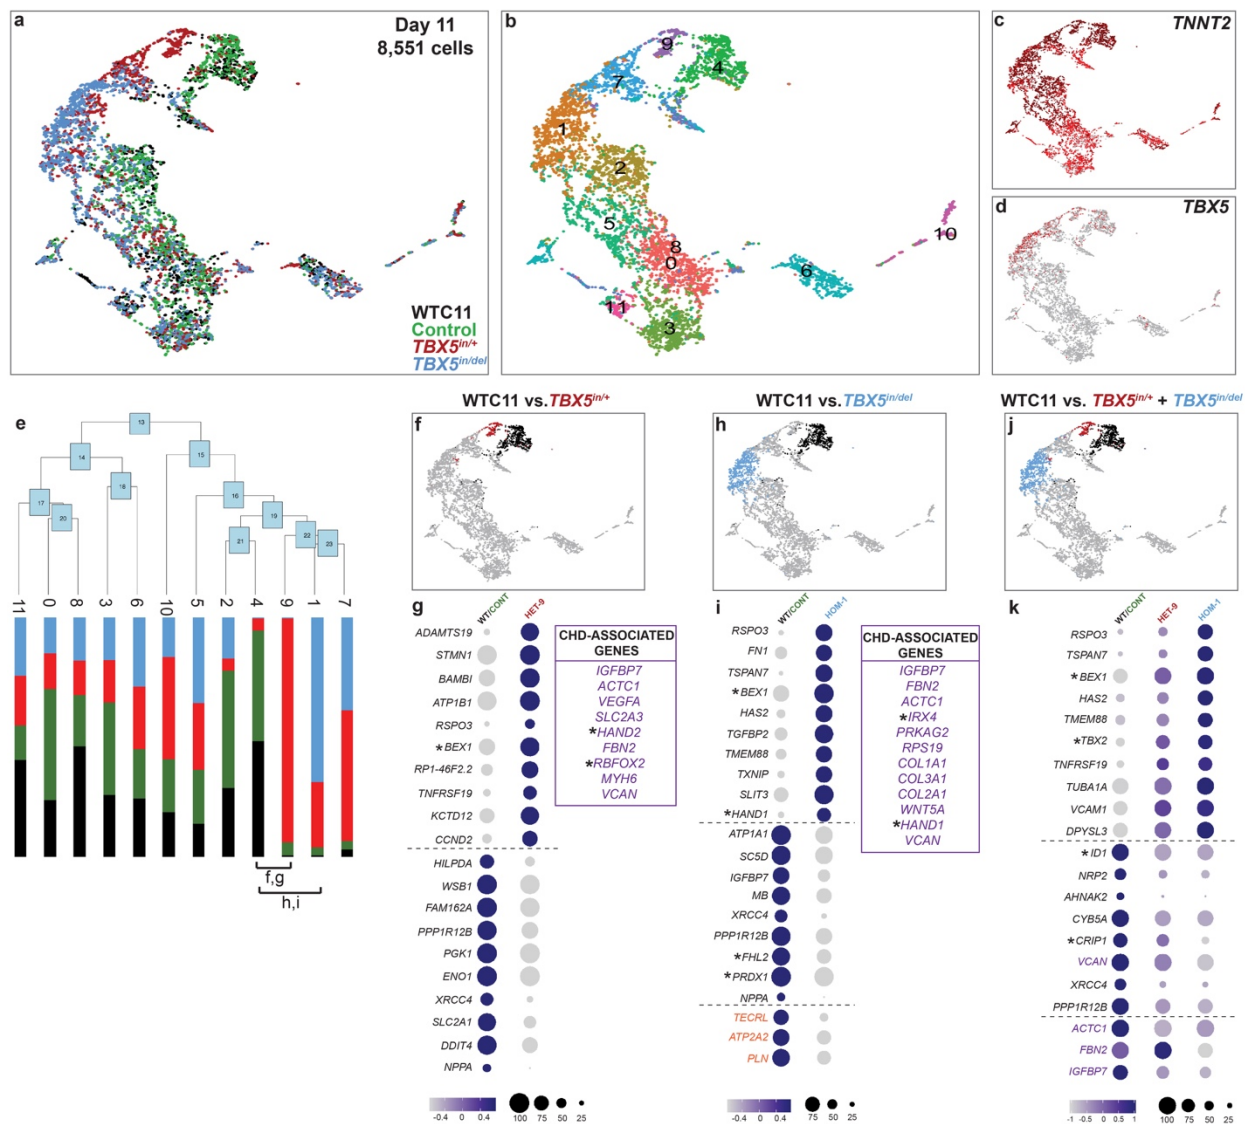

1058

1060

1062

1064

1066

1068

1070

1072

### Extended Data 6. Evaluation of reduced TBX5 dosage by gene expression in

**cardiomyocytes at day 11.** a, b, UMAPs of *TNNT2*<sup>+</sup> cells from day 11 of differentiation are

colored by *TBX5* genotype or by cluster identity, respectively. c, d, Feature plots by UMAP

display expression of *TNNT2* or *TBX5*. e, Phylogenetic tree depicts cluster relatedness. Vertical

bars show the proportion of cells by color of each *TBX5* genotype. f, h, UMAPs highlight

clusters chosen for pair-wise differential gene expression comparisons. g, i, Dot plots show top

differentially expressed genes between WT/control-enriched and *TBX5*<sup>in/+</sup>-enriched clusters, or

WT/control-enriched and *TBX5*<sup>in/del</sup>-enriched clusters, respectively. Electrophysiology-related

(orange) and congenital heart disease (CHD)-associated (purple) genes are highlighted.

Significance was determined by Wilcoxon Rank Sum test (adj p-value<0.05). j, UMAP

demonstrates pair-wise comparisons between WT/control-enriched and *TBX5*<sup>in/+</sup>-enriched

clusters, and WT/control-enriched and *TBX5*<sup>in/+</sup>-enriched clusters. k, Common genes that are

differentially expressed in both *TBX5*<sup>in/+</sup> and *TBX5*<sup>in/del</sup>, in each comparison with WT/control are

shown.

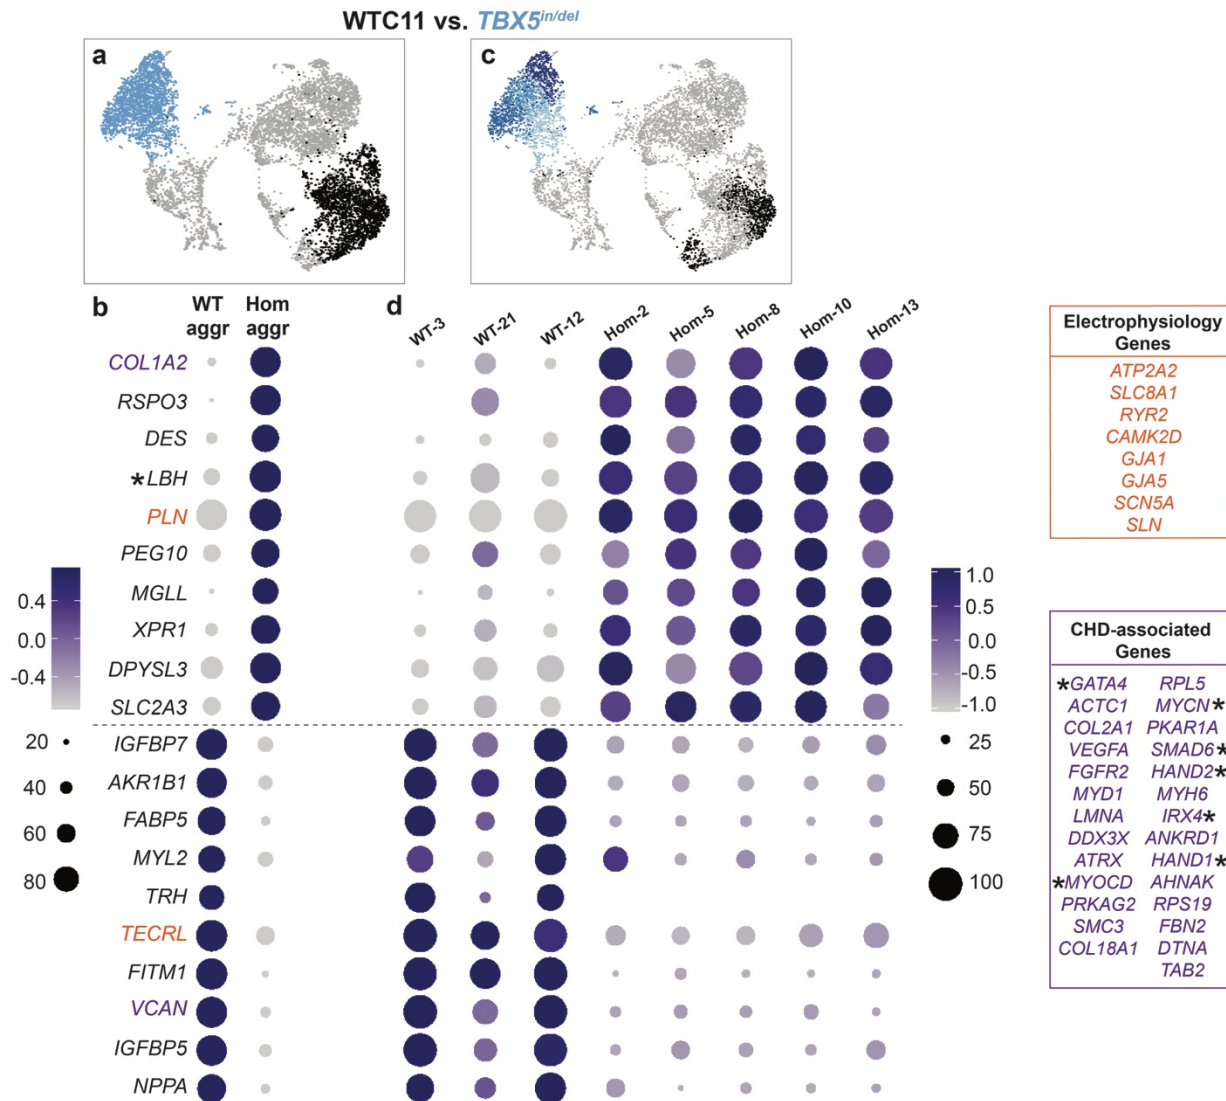

1074

1076

1078 **Extended Data 7. Loss of *TBX5* by gene expression in individual cardiomyocytes at day**

1080 **23. a**, UMAP of day 23 cardiomyocytes displays a wildtype-enriched (black) and *TBX5<sup>in/del</sup>*-

1082 enriched (blue) cluster, at a low Louvain resolution in Seurat, for comparison between clusters

1084 of *TBX5* genotypes. **b**, Dot plots showing top differentially expressed genes between aggregate

1086 WT-enriched and *TBX5<sup>in/del</sup>*-enriched clusters. Transcriptional regulators are denoted by

1088 asterisks. Electrophysiology-related (orange) and congenital heart disease (CHD)-associated

(purple) are highlighted. Significance was determined by Wilcoxon Rank Sum test (adj p-

value<0.05). **c**, UMAP shows clusters at a higher resolution, with three wildtype-enriched (black)

sub-clusters and five *TBX5<sup>in/del</sup>*-enriched (shades of blue) sub-clusters. **d**, Heterogeneity of gene

expression among labeled sub-clusters are shown.

1088

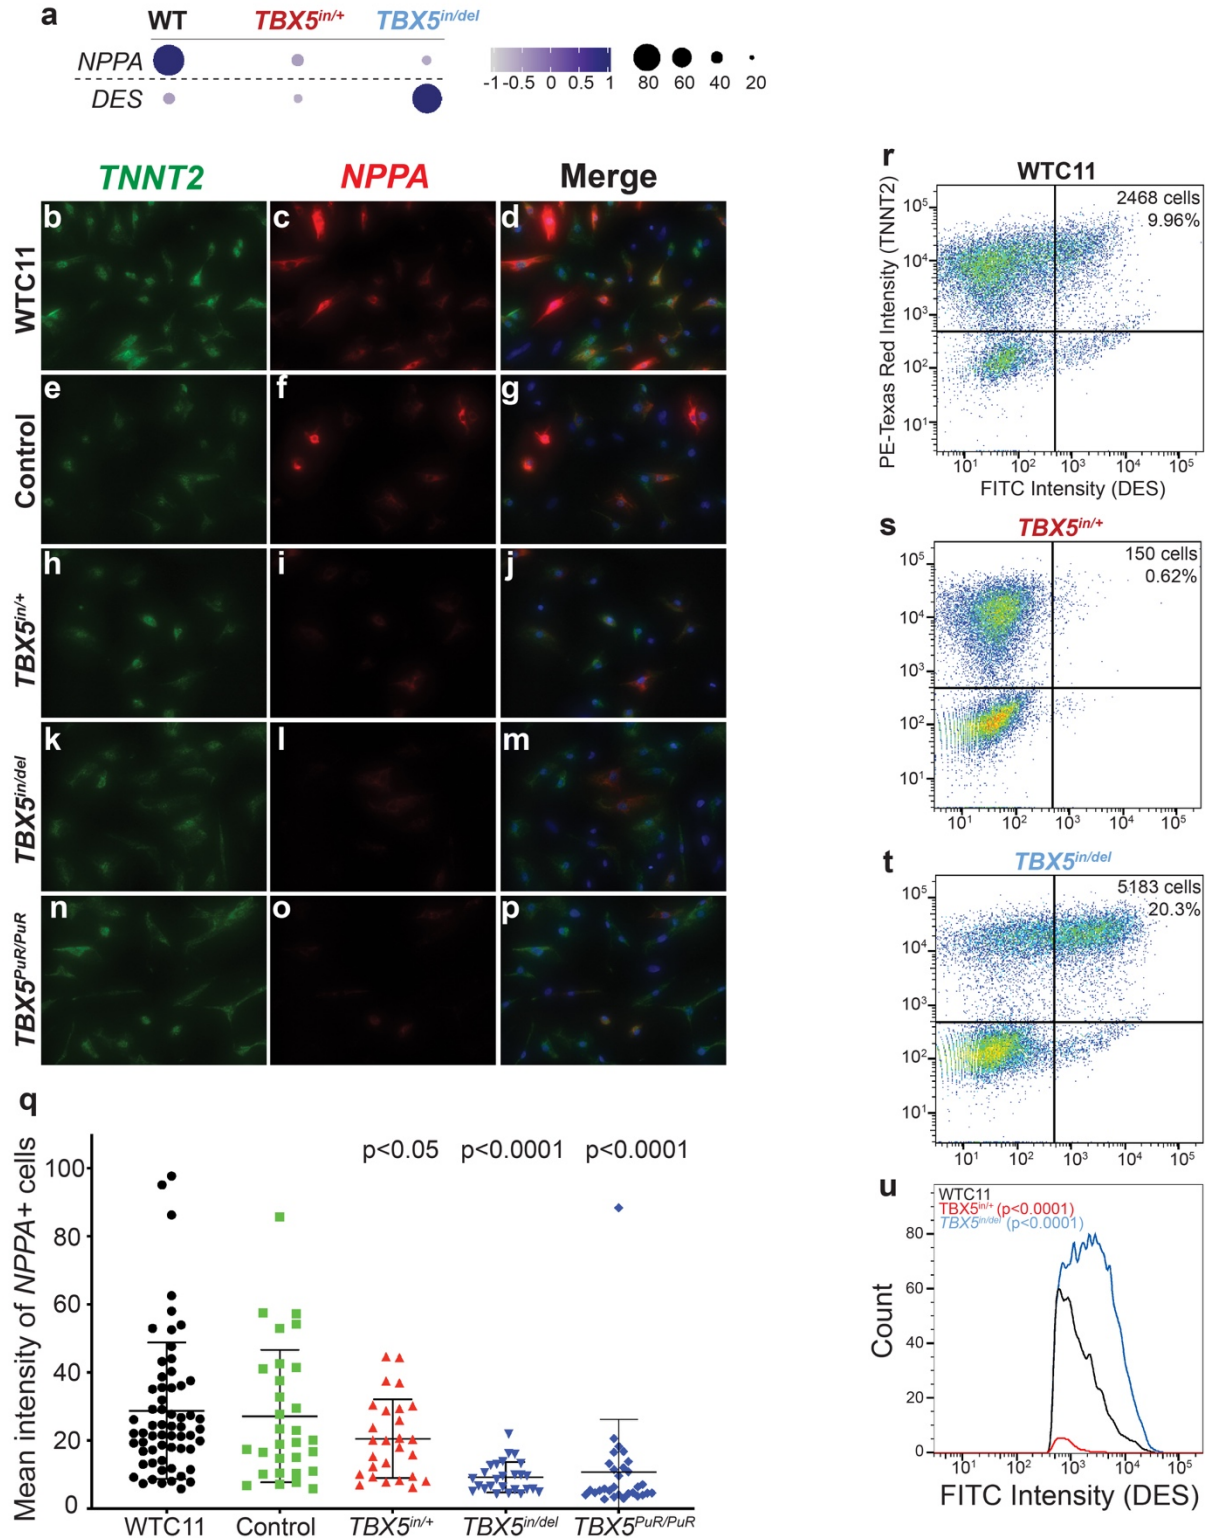

1090

1092

**Extended Data 8. Single cell analysis of TBX5-dependent genes by orthogonal assays. a,** Dot plots show expression of *NPPA* and *DES* in WTC11 (WT)-,  $TBX5^{in/+}$ - and  $TBX5^{in/del}$ - enriched clusters at day 23. **b-p,** Fluorescence *in situ* hybridization is visualized for *TNNT2*

1094

1096 (green) or *NPPA* (red) in day 23 cardiomyocytes, from **(b-d)** WTC11, **(e-g)** control, **(h-j)**  
1098 *TBX5<sup>in/+</sup>*, **(k-m)** *TBX5<sup>in/del</sup>* and **(n-p)** *TBX5<sup>PuR/PuR</sup>* cells. **q**, Graph displays mean intensity of *NPPA*  
1098 signal of individual double-positive *TNNT2<sup>+</sup>/NPPA<sup>+</sup>* cells by *TBX5* genotype. Significance of p-  
1100 values were calculated by unpaired *t* test. **r-t**, Pseudocolor plots showing cTNT<sup>+</sup> and DES<sup>+</sup>  
1102 double positive cells in **(r)** wildtype, **(s)** *TBX5<sup>in/+</sup>* or **(t)** *TBX5<sup>in/del</sup>* at day 23. **u**, Histogram of FITC  
intensity of DES<sup>+</sup> cells from wildtype, *TBX5<sup>in/+</sup>* or *TBX5<sup>in/del</sup>* cells is shown (\*\*\*\*p-value<1E-4 by  
Chi-Square test).



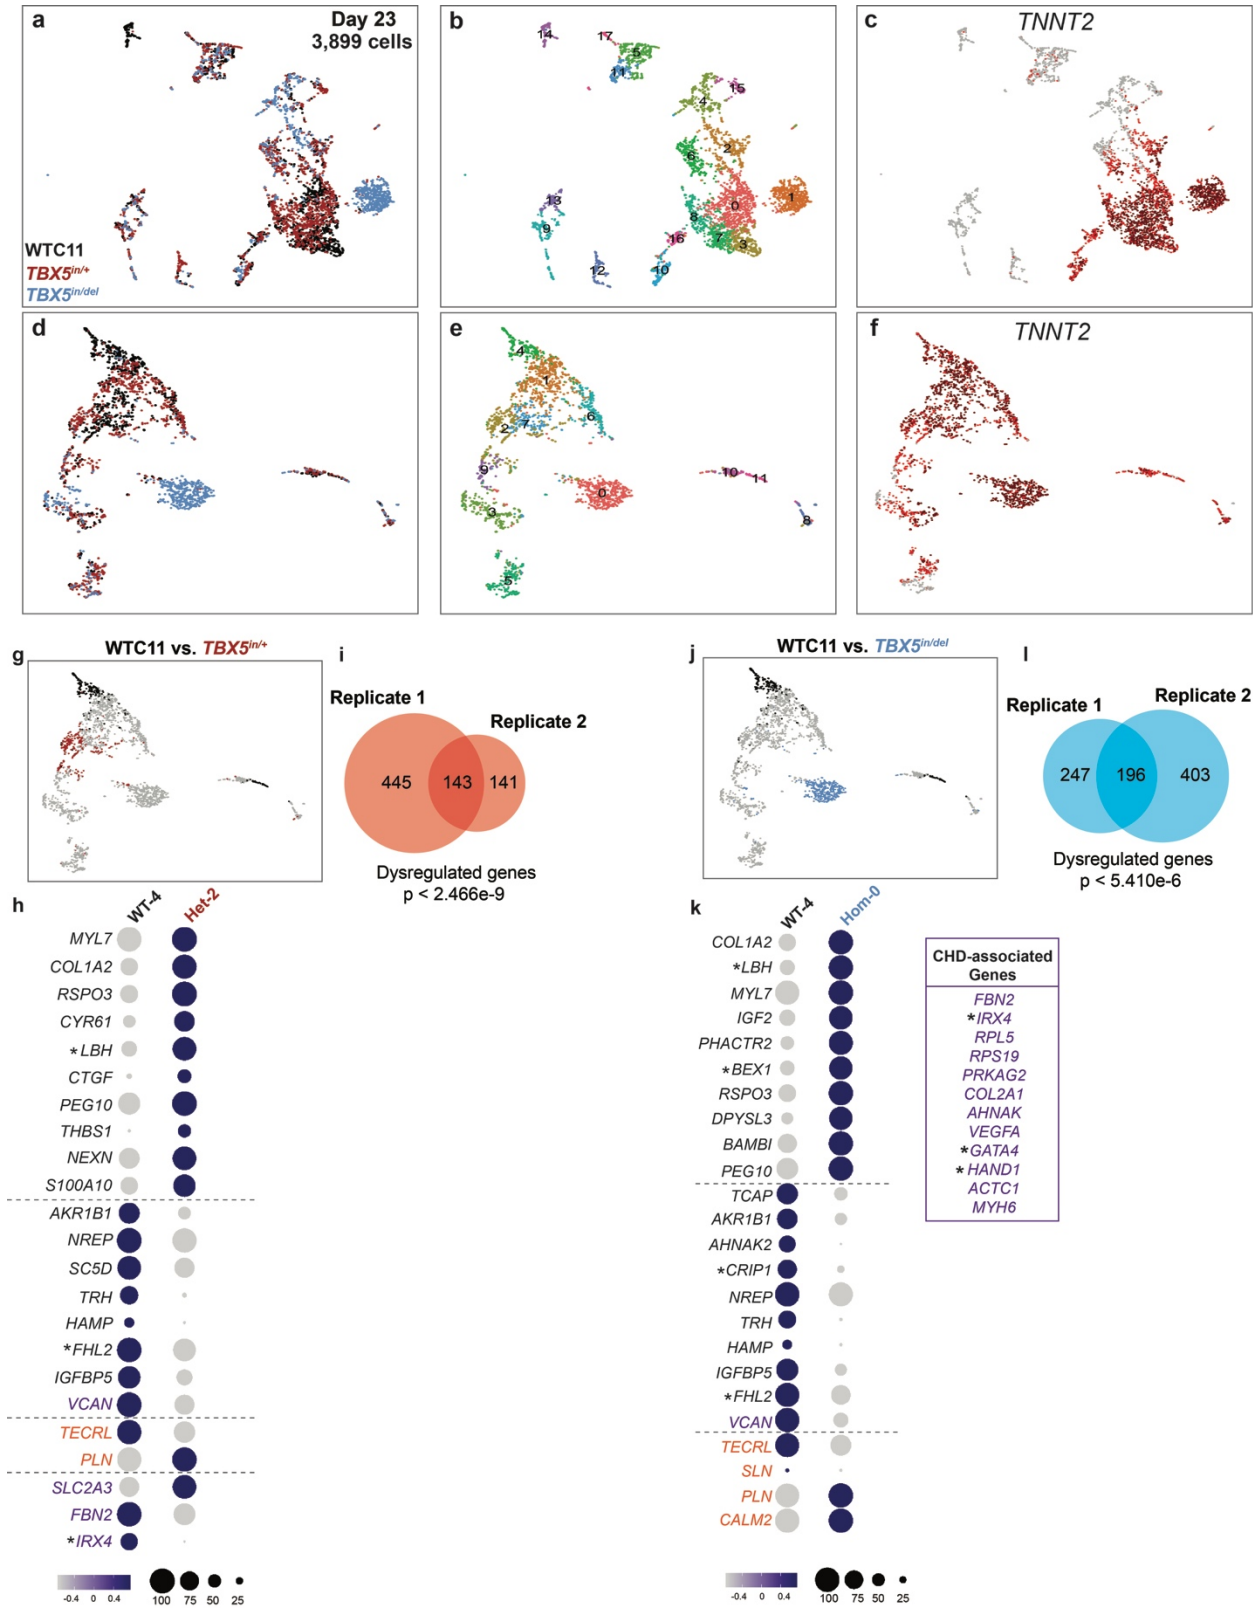

1104

1106 **Extended Data 9. Biological replicate of TBX5 dose-sensitive responses in WTC11-**  
1107 **derived cardiomyocytes at day 23. a, b,** Cells at day 23 of an independent differentiation  
1108 (biological replicate) were collected for single cell RNAseq analysis. UMAP shows all cells from  
1109 day 23 colored by *TBX5* genotype or by cluster identity, respectively. **c,** UMAP shows *TNNT2*  
1110 expression. **d, e,** UMAP of *TNNT2*<sup>+</sup> cells from day 23 are colored by *TBX5* genotype or by  
1111 cluster identity, respectively. **f,** UMAP shows *TNNT2* expression in *TNNT2*<sup>+</sup> cells. **g, j,** UMAPs  
1112 highlight clusters used in pair-wise differential gene tests. **h, k,** Dot plots show top differentially  
1113 expressed genes between wildtype (WT)-enriched and *TBX5*<sup>in/+</sup>-enriched or *TBX5*<sup>in/del</sup>-enriched  
1114 clusters (Supplementary Table 2). Electrophysiology-related (orange) or congenital heart  
1115 disease (CHD)-associated (purple) genes are indicated. Asterisks denote transcription factors.  
1116 Significance was determined by Wilcoxon Rank Sum test (adj p-value<0.05). **i, l,** Venn  
1117 diagrams show overlap of differentially expressed genes detected in the first and second  
1118 biological replicates at day 23. Statistical significance was determined by Hypergeometric test,  
1119 based on the union of highly variable genes from both datasets (1,688) as the population size.  
1120



a

WTC11 vs. *TBX5*<sup>in/+</sup>  
+ *TBX5*<sup>in/del</sup> Rep 1

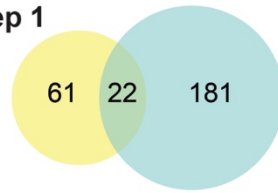

WTC11 vs. *TBX5*<sup>in/+</sup>  
+ *TBX5*<sup>in/del</sup> Rep 2

$p < 1.641e-04$

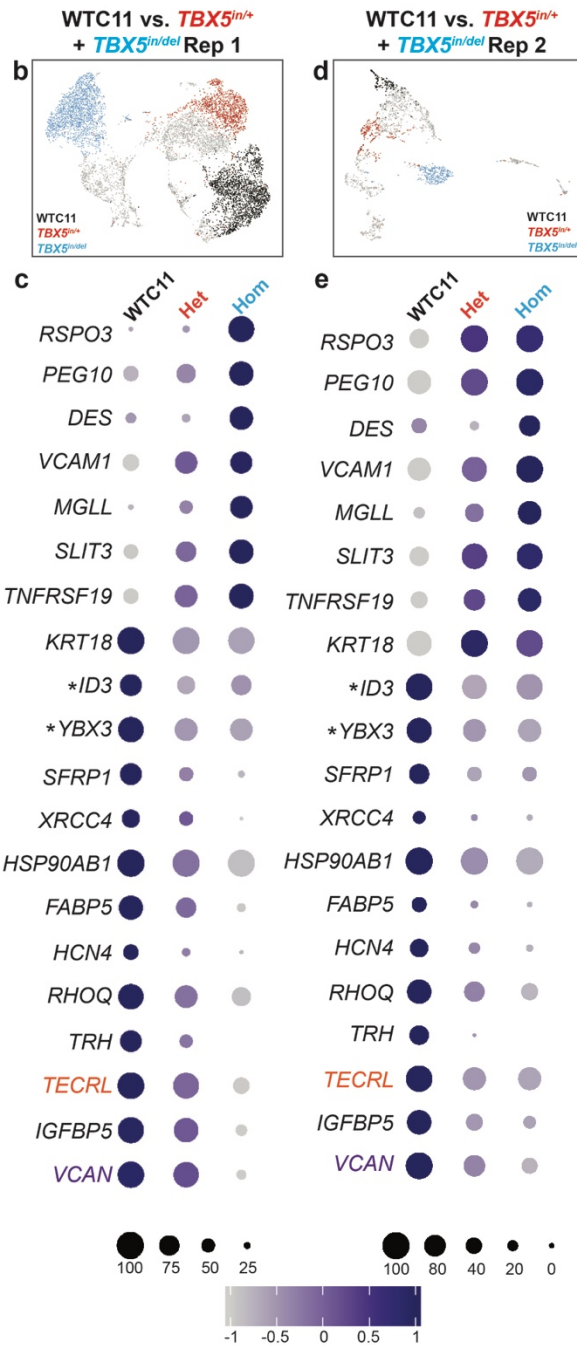

1122

**Extended Data 10. Overlap of TBX5 dose-dependent genes between biological replicates.**

1124 **a**, Venn diagram shows overlap of differentially expressed genes detected at day 23 in WTC11-  
1126 targeted  $TBX5^{in/+}$  and  $TBX5^{in/del}$  cells from biological replicate 1 and replicate 2. Statistical  
1128 significance was determined by Hypergeometric test, based on the union of highly variable  
1130 genes from both datasets (1,688) as the population size. **b, d**, UMAPs demonstrate clusters  
1132 chosen for differential gene expression within each experiment for comparison. **c, e**, Dot plots  
1134 show top differentially expressed genes for replicates. Significance was determined by Wilcoxon  
Rank Sum test (adj p-value<0.05). **f**, Venn diagram shows overlap of differentially expressed  
genes between genetic backgrounds of WTC11-targeted  $TBX5^{in/+}$  and  $TBX5^{in/del}$  cells and PGP1-  
targeted  $TBX5^{in/+}$  and  $TBX5^{del/del}$  cells. **g, i**, UMAPs show clusters chosen for differential gene  
expression for comparison. **h, j**, Dot plots show top differentially expressed genes in each  
genetic background by  $TBX5$  genotype.

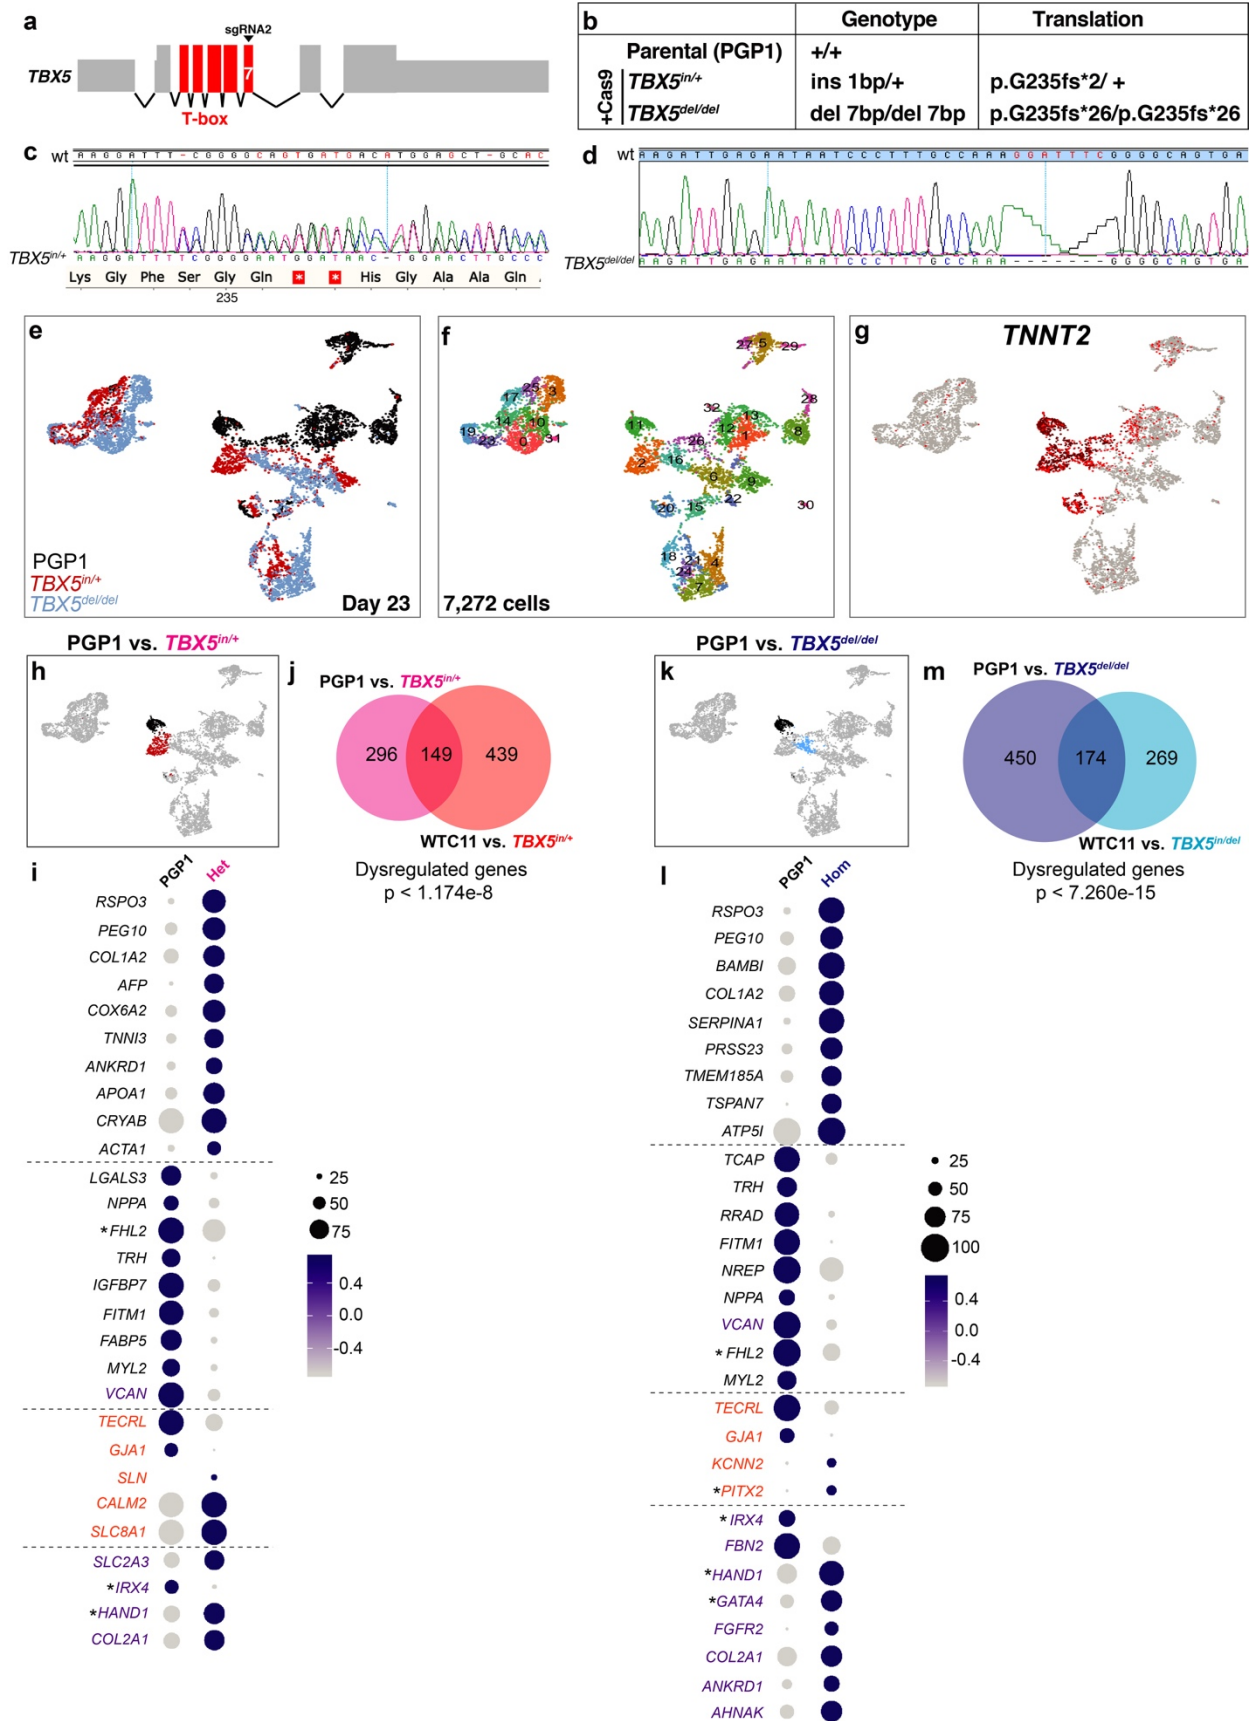

1138 **Extended Data 11. Assessment of an alternative genetic background for TBX5 dose-**  
1140 **sensitive gene expression. a**, Diagram of human *TBX5* gene is shown, with exons in red. The  
1142 guide sgRNA2 was used to target exon 7, which encodes a portion of the T-box domain, of  
1144 *TBX5* in PGP1 iPS cells. **b**, Table specifies the nature of each *TBX5* mutation and the predicted  
1146 translation of *TBX5* for PGP1-derived *TBX5*<sup>in/+</sup> or *TBX5*<sup>del/del</sup> cells. **c, d**, Chromatogram indicates  
1148 a 1 base pair insertion of the mutant *TBX5* allele for PGP1-derived *TBX5*<sup>in/+</sup> cells (**c**) or a 7 base  
1150 pair deletion of *TBX5* in *TBX5*<sup>del/del</sup> cells (**d**). **e-g**, UMAPs of all cells from day 23 by *TBX5*  
1152 genotype (**e**), cluster identity (**f**), or by *TNNT2* expression (**g**). **h, k**, UMAPs mark *TBX5*  
1154 genotype-enriched clusters by color that were selected for differential gene expression test. **i, l**,  
1156 Dot plots show top differentially expressed genes in (**i**) *TBX5*<sup>in/+</sup>- or (**l**) *TBX5*<sup>del/del</sup>-enriched  
clusters. Significance was determined by Wilcoxon Rank Sum test (adj p-value<0.05)  
(Supplementary Table 2). **j**, Venn diagram shows overlap of *TBX5*-dependent gene sets  
between differences of WTC11 and WTC11-derived *TBX5*<sup>in/+</sup> clusters and differences of PGP1  
and PGP1-derived *TBX5*<sup>in/+</sup> clusters. **m**, Venn diagram displays overlap of *TBX5*-dependent  
gene sets between differences of WTC11 and WTC11-derived *TBX5*<sup>in/del</sup> and differences of  
PGP1 and PGP1-derived *TBX5*<sup>del/del</sup>. Statistical significance was determined by Hypergeometric  
test, based on the union of highly variable genes from both datasets (2,566) as the population  
size.

a

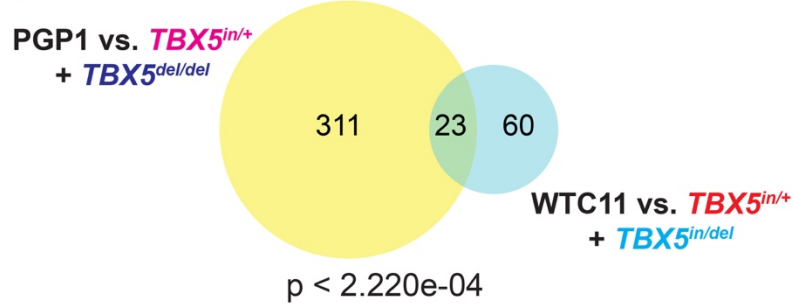

WTC11 vs. **TBX5<sup>in/+</sup>** + **TBX5<sup>in/del</sup>**      PGP1 vs. **TBX5<sup>in/+</sup>** + **TBX5<sup>del/del</sup>**

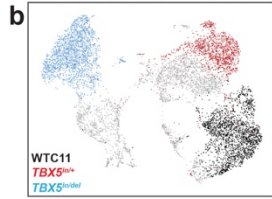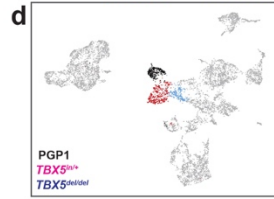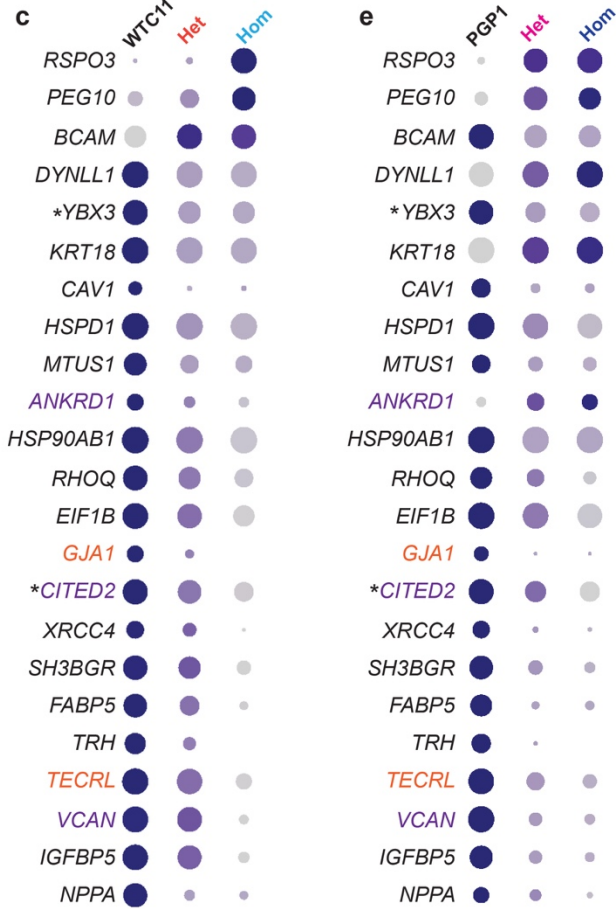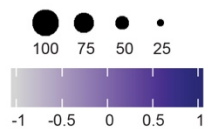

1158

1160 **Extended Data 12. Overlap of TBX5 dose-dependent genes between genetic**  
1162 **backgrounds. a**, Venn diagram shows overlap of differentially expressed genes between  
1164 genetic backgrounds of WTC11-targeted  $TBX5^{in/+}$  and  $TBX5^{in/del}$  cells and PGP1-targeted  
1166  $TBX5^{in/+}$  and  $TBX5^{del/del}$  cells. Statistical significance was determined by Hypergeometric test,  
1168 based on the union of highly variable genes from both datasets (2,566) as the population size.  
**b, d**, UMAPs show clusters chosen for differential gene expression for comparison. **c, e**, Dot  
plots show top differentially expressed genes in each genetic background by  $TBX5$  genotype  
(adj p-value<0.05 by Wilcoxon Rank Sum test).

**a**

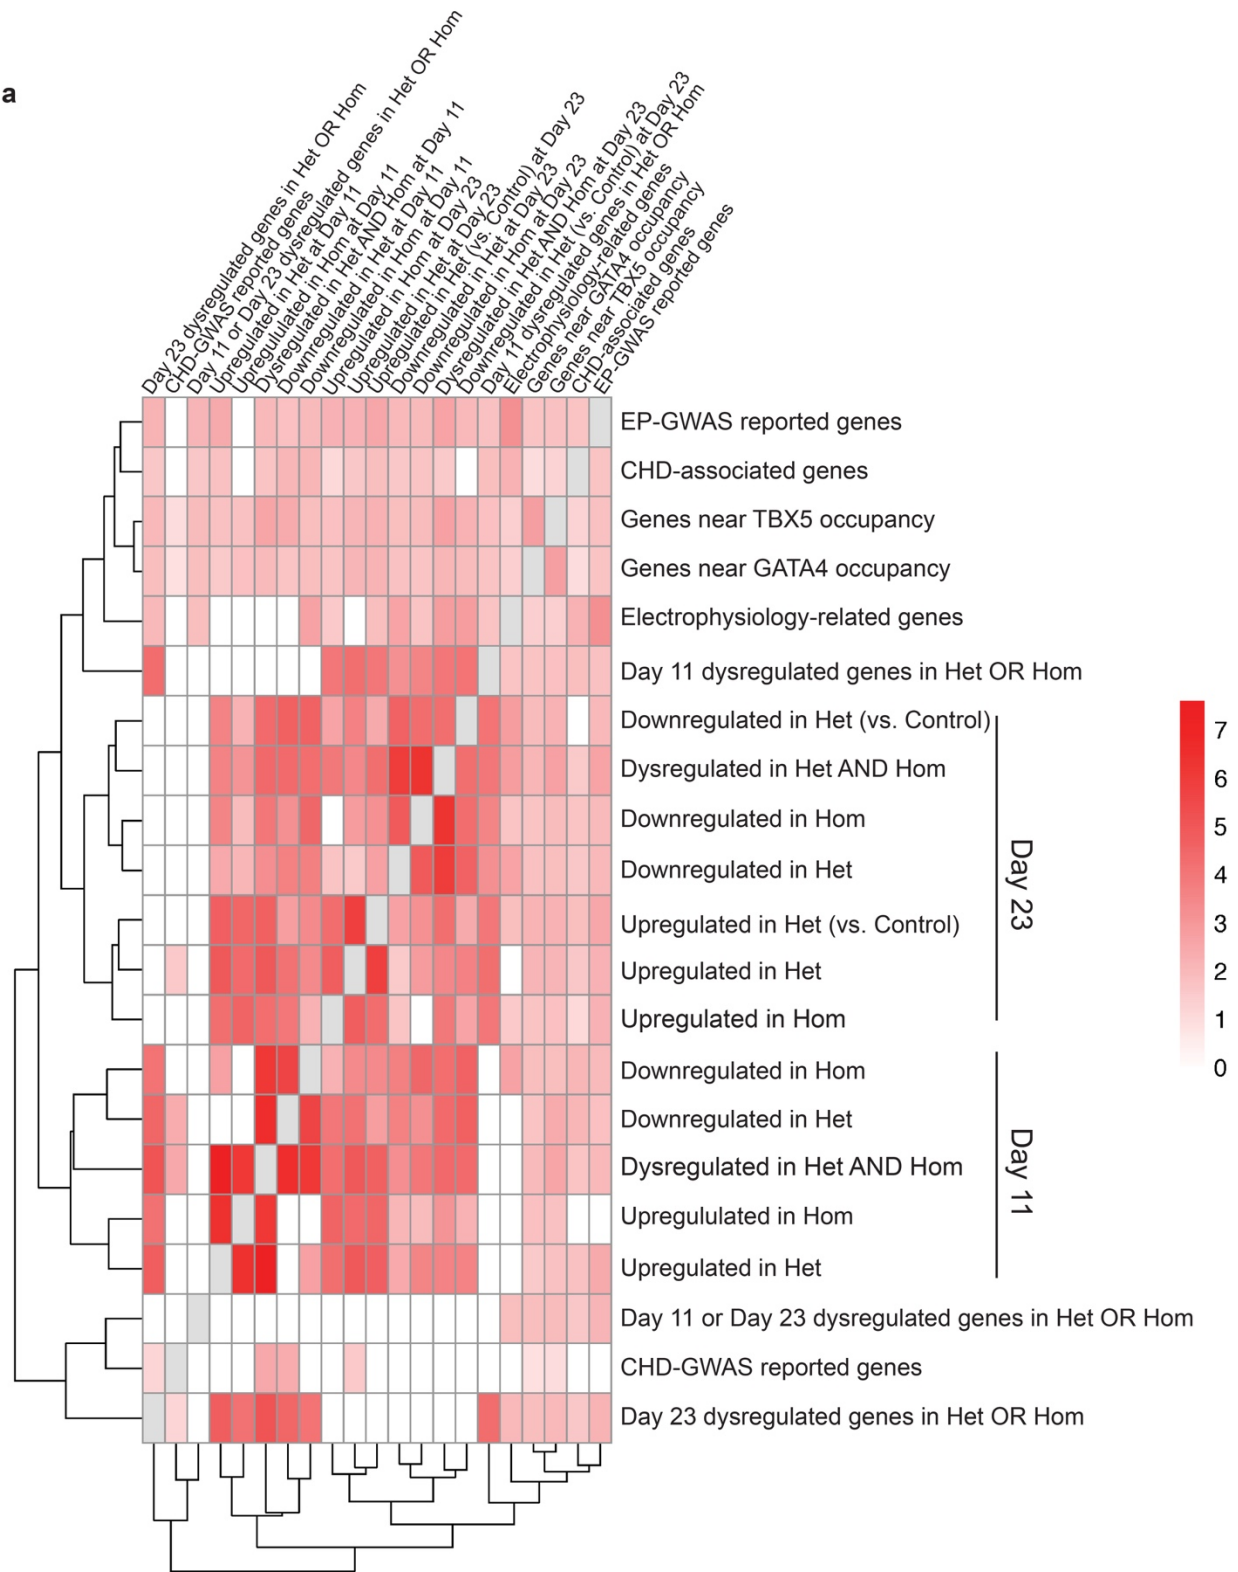

1170

1172



1174 **Extended Data 13. Associations between disease candidates, GWAS reported genes,**  
1175 **TBX5 or GATA4 occupancy, or TBX5-dependent genes. a,** Heat map indicates odds ratios  
1176 (FDR<0.05) between several variables, including CHD-associated genes, EP-related genes,  
1177 CHD-related GWAS reported genes, arrhythmia-related GWAS (EP-GWAS) reported genes,  
1178 TBX5 or GATA4 occupancy, and TBX5-dependent gene sets at day 11 or day 23  
1179 (Supplementary Table 4). Statistical significance was determined by Benjamini-Hochberg  
1180 multiple testing.

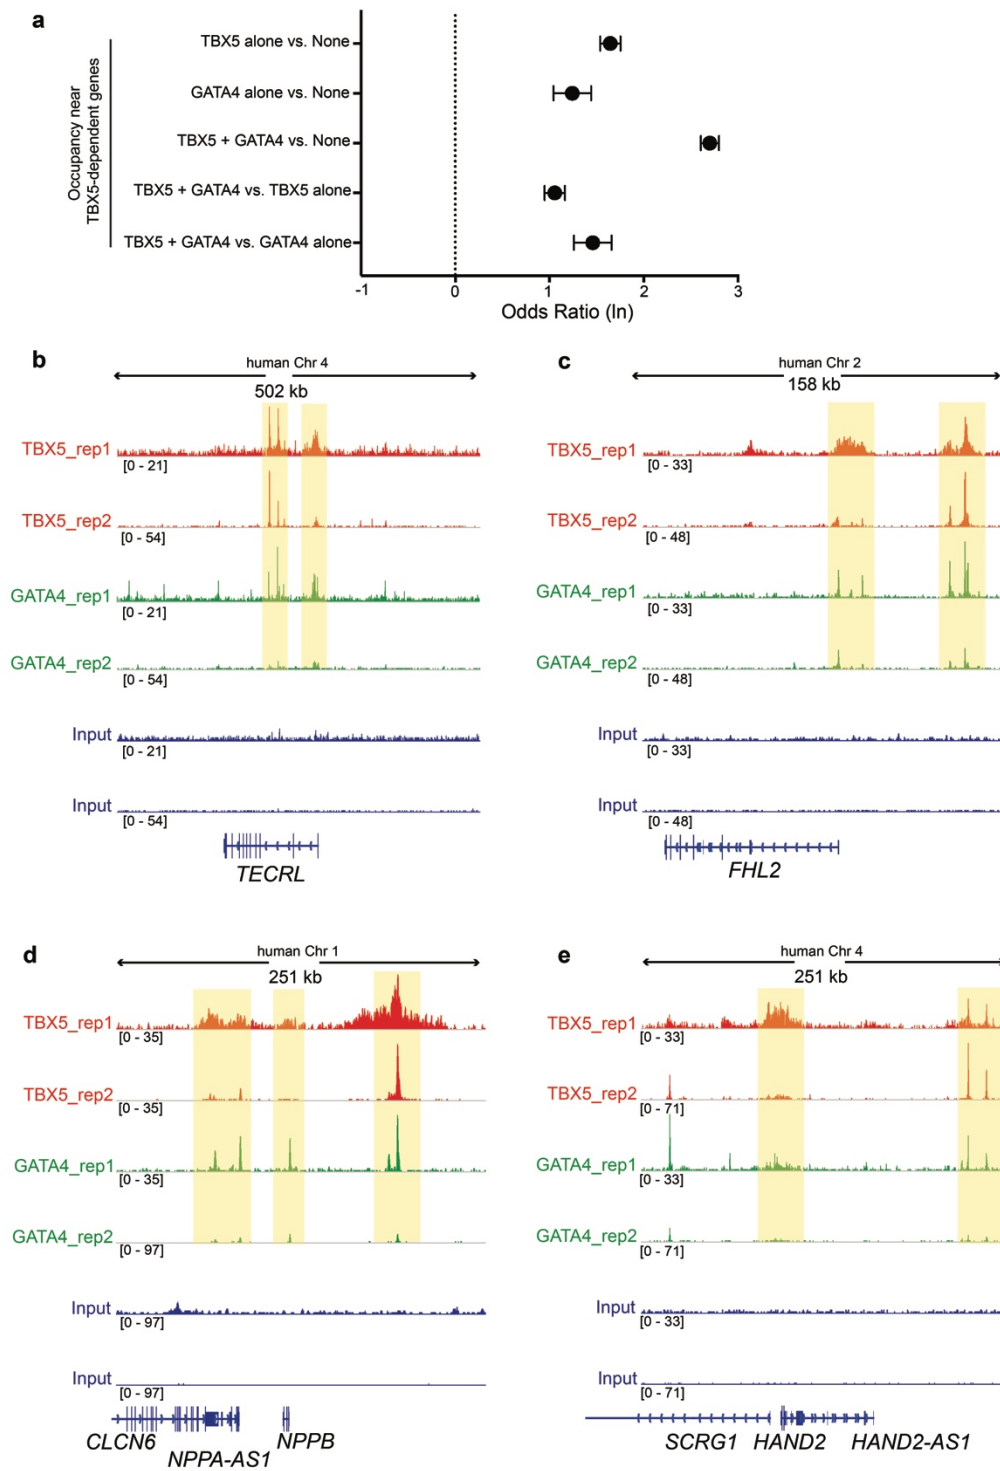

**Extended Data 14. Co-occupancy of TBX5 or GATA4 near human TBX5-dependent genes.**

1184 **a**, Odds ratios (FDR<0.05) of TBX5, GATA4 or TBX5 and GATA4 occupancy near all human  
1186 TBX5-dependent genes. Statistical significance was determined by Benjamini-Hochberg  
1188 multiple testing (Supplementary Table 5). **b**, Browser tracks of TBX5 and GATA4 occupancy  
from iPS cell-derived cardiomyocytes are shown for loci of TBX5-dependent genes *TECRL*,  
*FHL2*, *NPPA/NPPB* or *HAND2*.

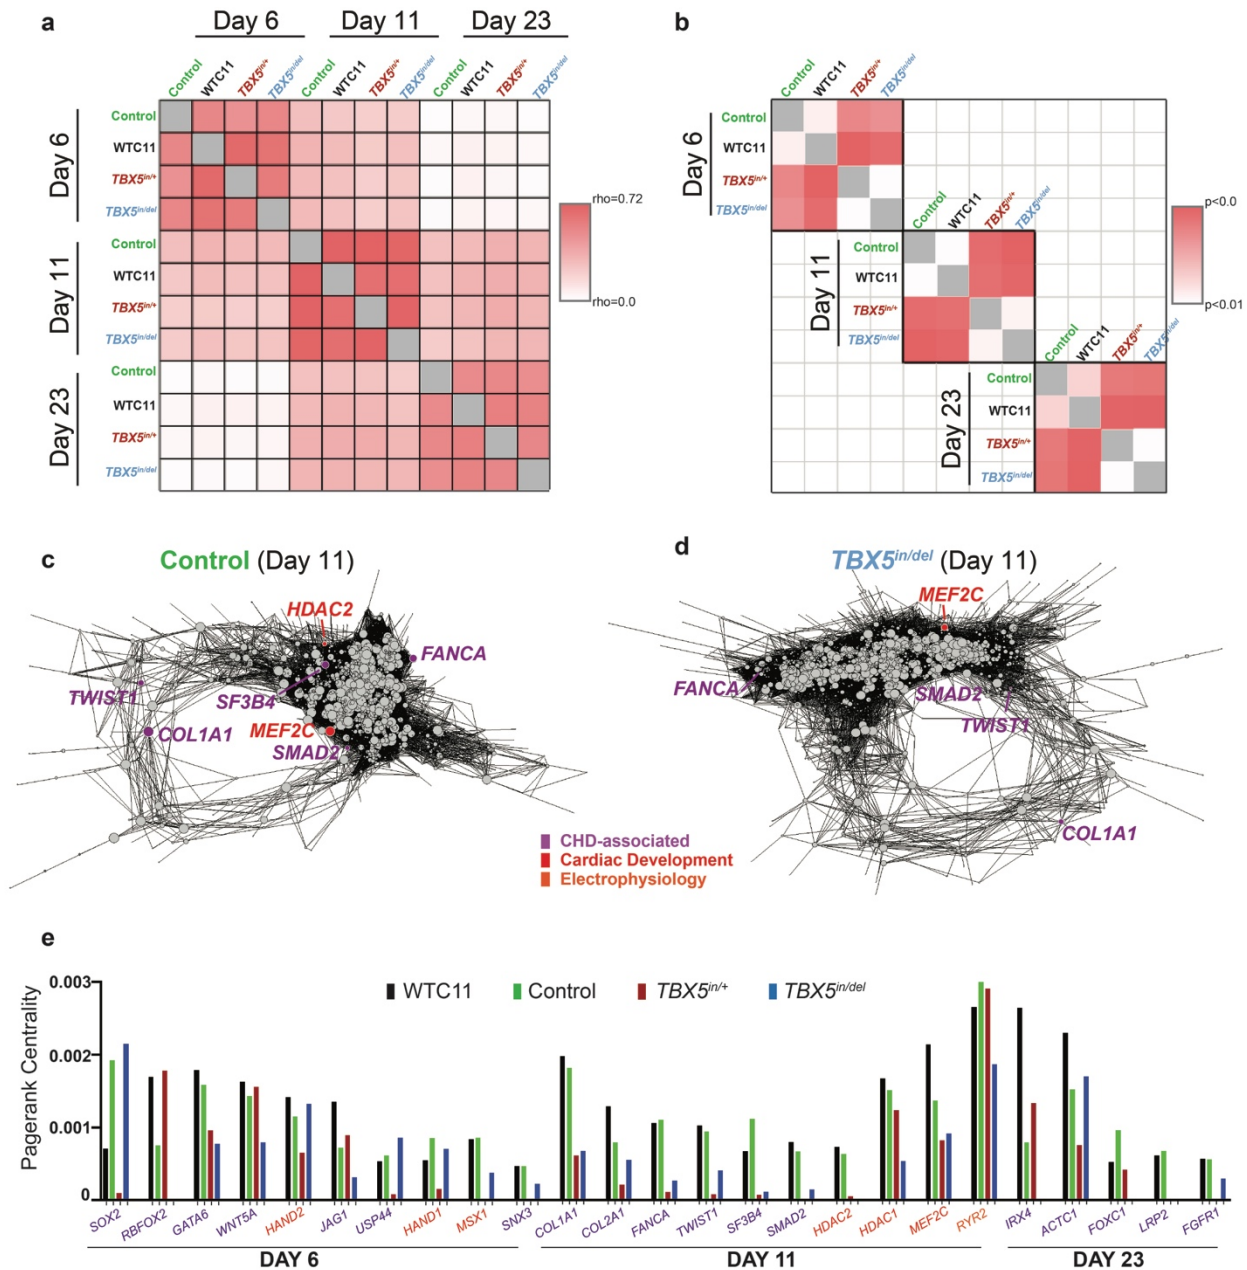

1190

1192

**Extended Data 15. Analysis of TBX5 dosage-sensitive gene regulatory networks.** **a**, Correlation plot (Pearson correlations of pagerank centralities) of networks by genotypes and time points are shown. Note that networks display highest similarity (red) within a time point. An inter-stage dissimilarity (white) grows proportionally to the time difference (i.e. Day 23 is less similar to Day 6 than Day 11). Therefore, comparisons for genotype differences were made within differentiation stages. **b**, Network similarity among genotypes within each time point is shown (Wilcoxon Rank Sum test of pagerank centralities for nodes from selected time point comparisons). **c**, **d**, Network diagrams of day 11 cardiomyocytes for control (**c**) or *TBX5*<sup>in/del</sup> (**d**) are shown. **e**, Quantification of pagerank centrality for significantly altered (top 5% cutoff) nodes of CHD-associated or heart development genes at specific time points are shown.

1202

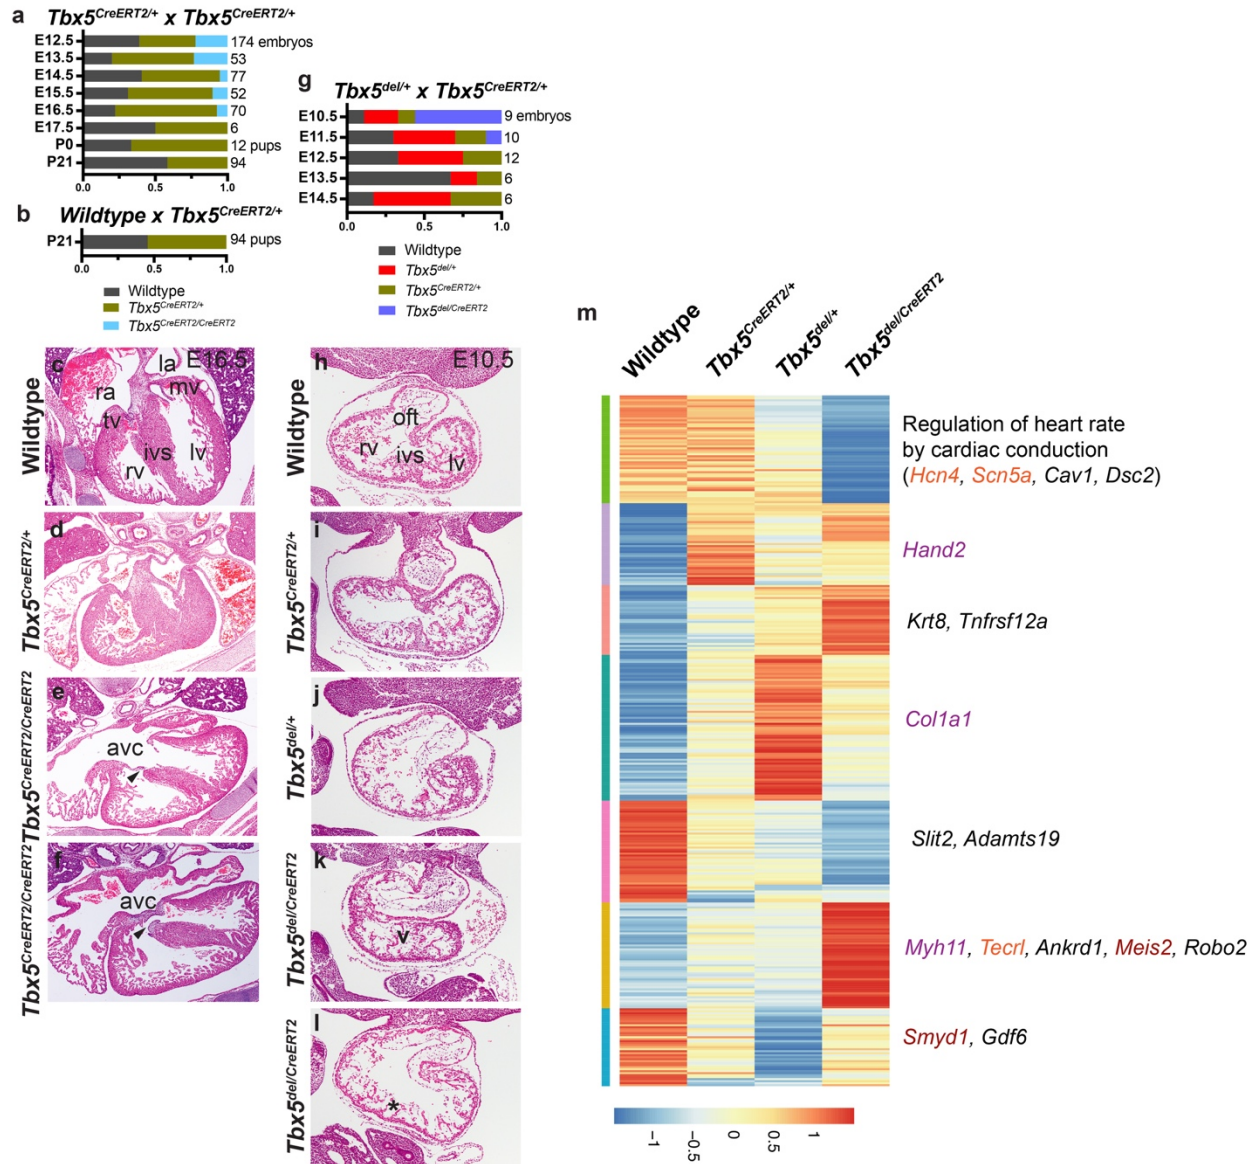

1204

1206

1208

1210

1212

1214

1216

1218

**Extended Data 16. An allelic series of *Tbx5* mutants in mouse.** **a**, Embryos or pups from matings of  $Tbx5^{CreERT2/+} \times Tbx5^{CreERT2/+}$  were genotyped. Expected Mendelian ratios were not observed for  $Tbx5^{CreERT2/CreERT2}$  after E13.5. **b**, Expected Mendelian ratios were observed for pups at weaning from matings of  $Tbx5^{CreERT2/+} \times$  wildtype. **c-f**, Transverse sections of hearts at embryonic day 16.5 (E16.5) from each genotype are shown. Right atrium (ra), left atrium (la), right ventricle (rv), left ventricle (lv), tricuspid valve (tv), mitral valve (mv) and interventricular septum (ivs) are labeled. Note atrioventricular canal defects (avc), which includes membranous VSDs (arrowheads), in  $Tbx5^{CreERT2/CreERT2}$  hearts (**e**, **f**). **g**, Expected Mendelian ratios from matings of  $Tbx5^{CreERT2/+} \times Tbx5^{del/+}$  were not observed for  $Tbx5^{del/CreERT2}$  after E10.5. **h-i**, Transverse sections of individual hearts at embryonic E10.5 from each genotype are shown. Note a single ventricle (v) and lack of invagination (\*) at the site of the nascent interventricular groove. **m**, Heat map by genotype of average gene expression data from 4 individual whole hearts at E10.5 (Supplementary Table 7). Significant GO term (adj p-value <0.05) for one cluster is shown, including underlying genes. TBX5-dependent mouse genes that are also

1220 TBX5-sensitive in human cells are shown. CHD-associated (purple), electrophysiology-related  
1222 (orange), or heart development (red) genes are highlighted.



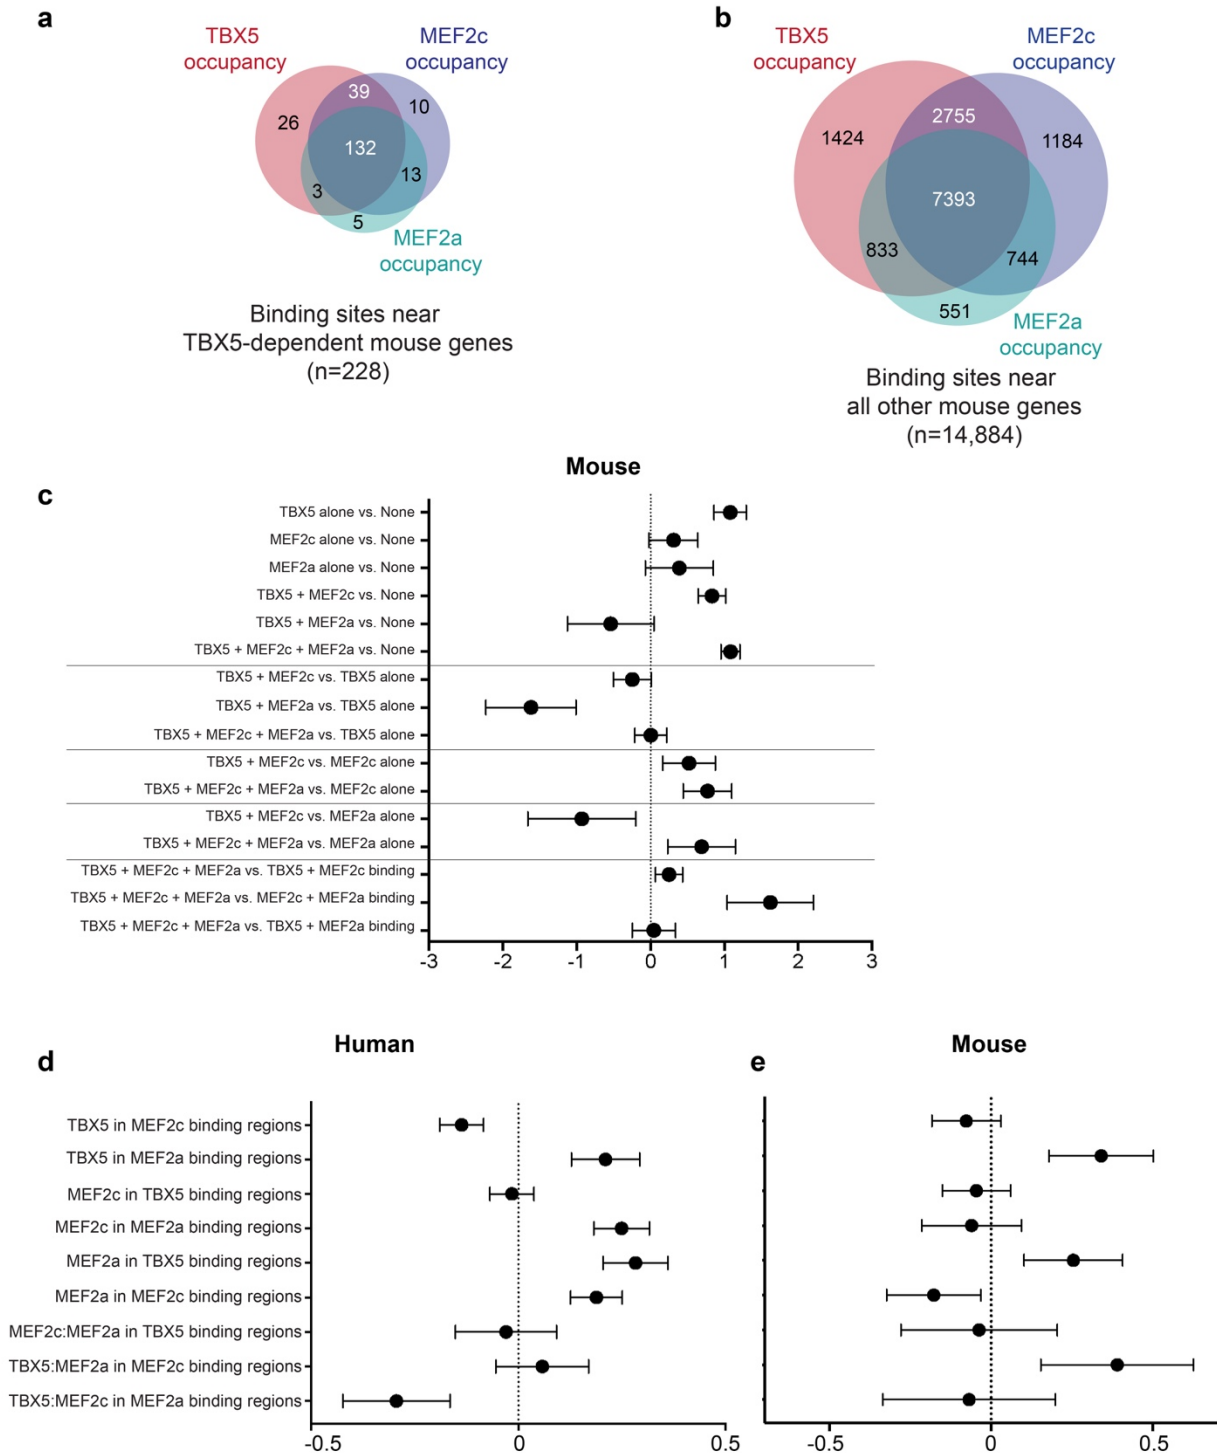

1224

1226

1228

1230

**Extended Figure 17. Analyses of TBX5, MEF2c and MEF2a co-occupancy.** **a, b**, Venn diagrams display the overlap of TBX5, MEF2a or MEF2c occupancy near mouse orthologs of human TBX5-dependent or -independent genes, respectively. **c**, Odds ratios (FDR<0.05) of combinations of TBX5, MEF2a or MEF2c occupancy near TBX5-dependent mouse genes

1232 (Supplementary Table 5). **d, e**, Odds ratios (FDR<0.05) of combinations of MEF2a or MEF2c  
1234 occupancy within 1kb of TBX5 binding sites near TBX5-dependent or all other genes in human  
(**d**) or mouse (**e**) (Supplementary Table 8).

1236

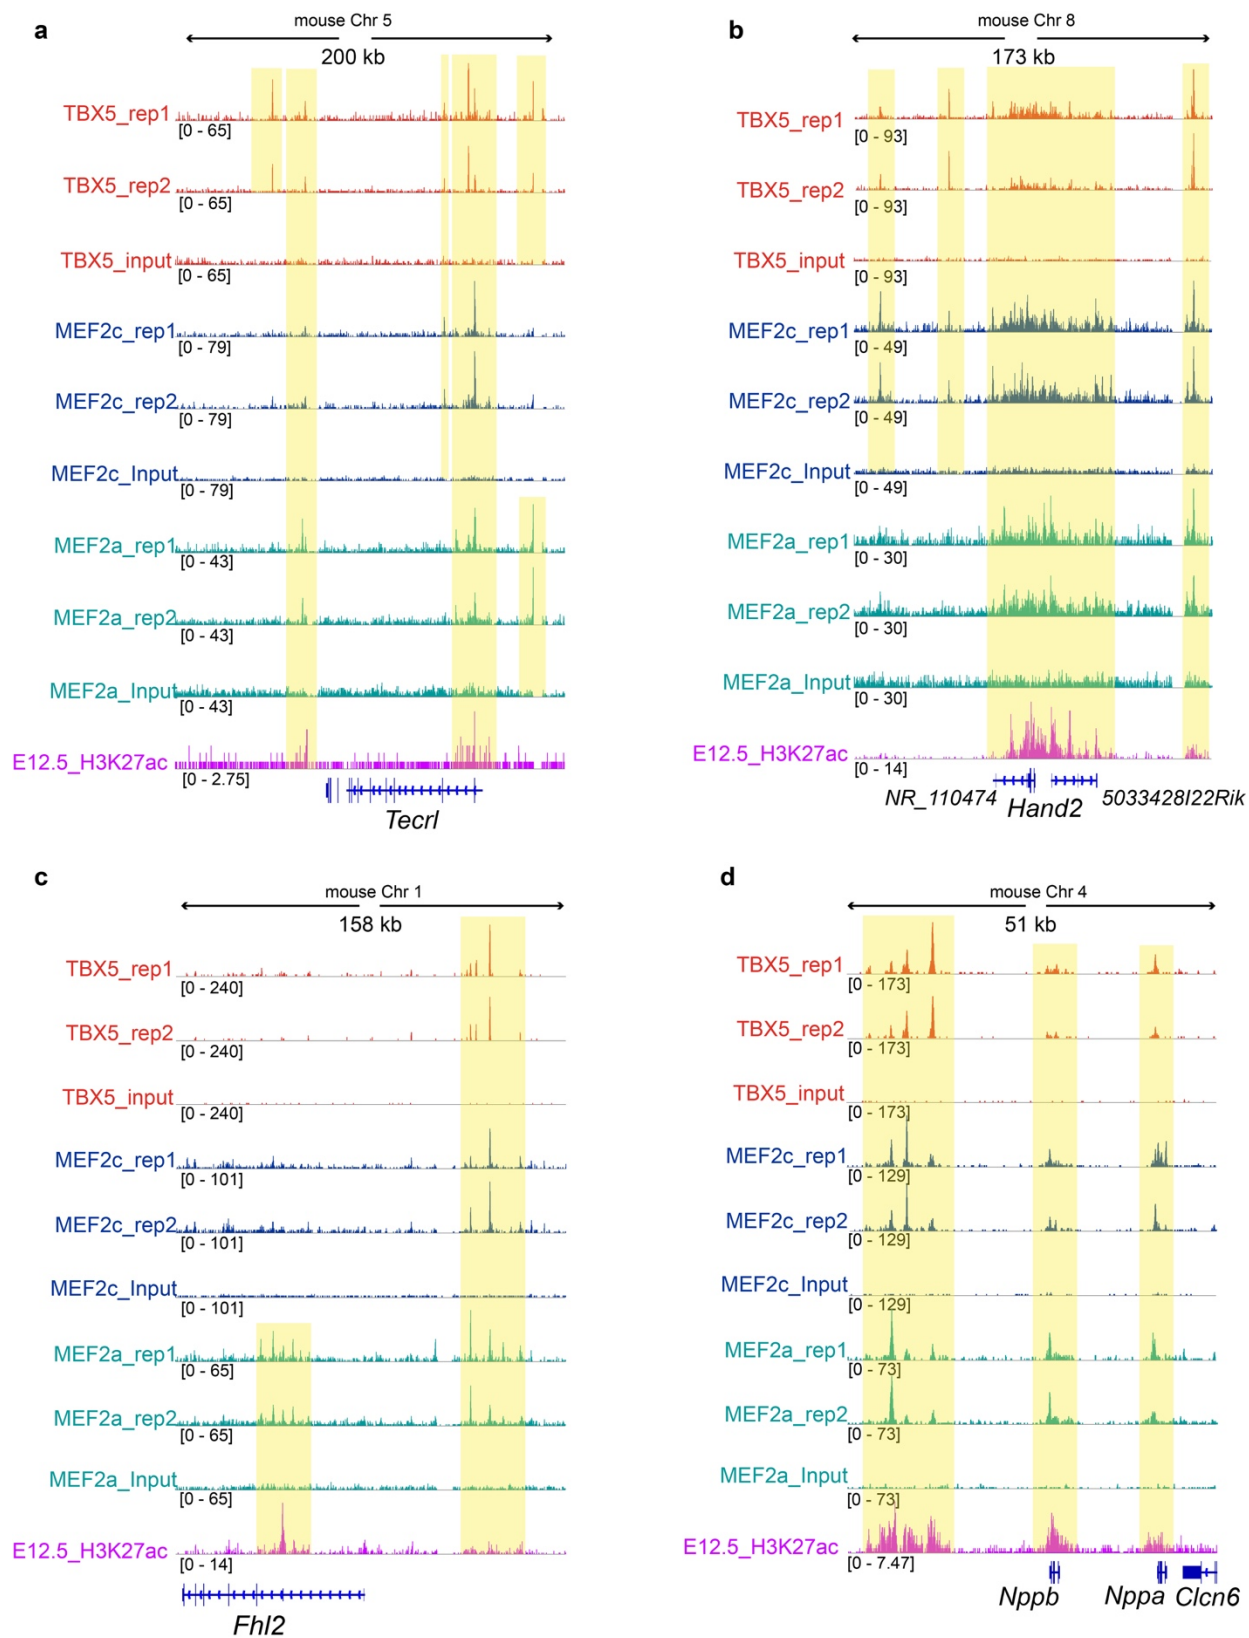

1240 **Extended Data 18. Co-occupancy of TBX5, MEF2a and MEF2c near TBX5-dependent**  
1242 **genes. a-d,** Browser tracks for ChIP-seq data from E12.5 hearts of TBX5, MEF2c, MEF2a and  
H3K27ac near conserved TBX5-dependent genes, *Hand2*, *Tecrl*, *Fhl2* and *Nppa/Nppb*. Yellow  
bands of shading indicate co-occupancy that is present in replicates but not in input.

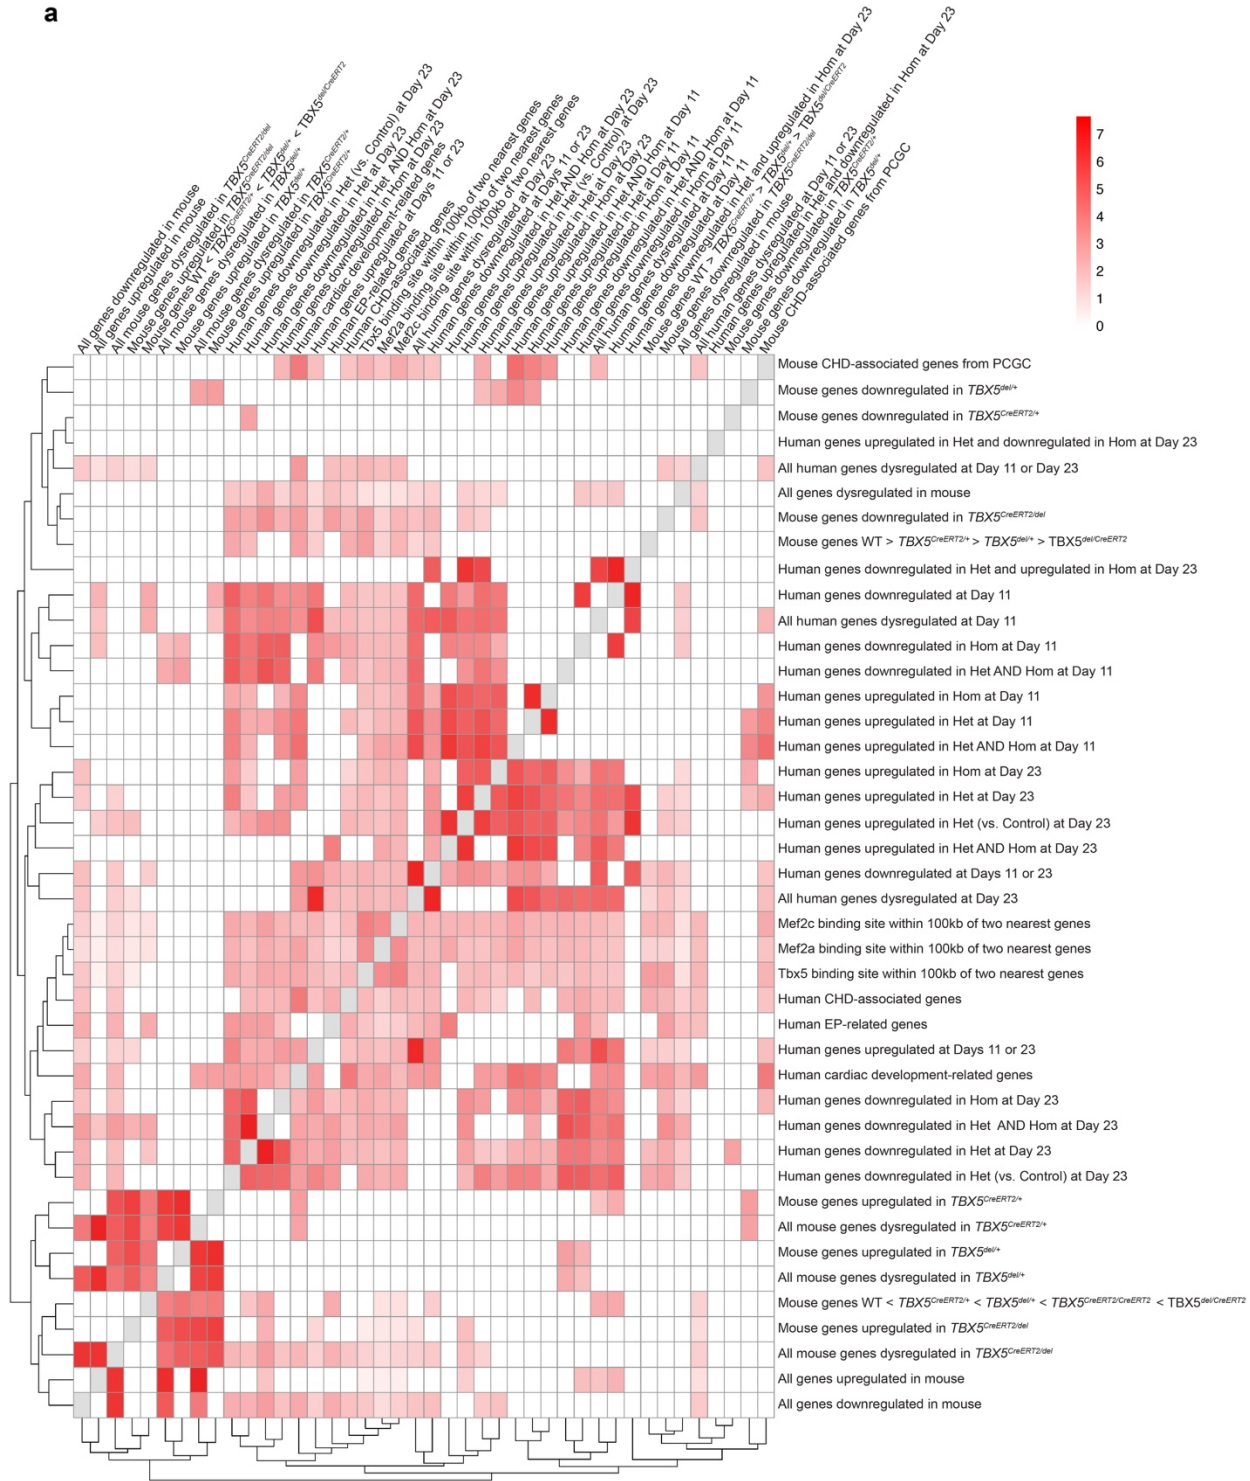

1244

1246

1248

1250

**Extended Data 19. Correlations of between disease candidates, GWAS reported genes,  $TBX5$ ,  $MEF2c$  or  $MEF2a$  occupancy, or  $TBX5$ -dependent genes. a, Heat map indicates odds ratios (FDR<0.05) between several variables, including CHD-associated genes, EP-related genes, CHD-related GWAS reported genes, arrhythmia-related GWAS (EP-GWAS) reported genes,  $TBX5$ ,  $MEF2c$ , or  $MEF2a$  occupancy, and  $TBX5$ -dependent human gene sets at day 11**

1252 or day 23 or TBX5-dependent mouse gene sets (Supplementary Table 6). Statistical  
1254 significance was determined by Benjamini-Hochberg multiple testing.



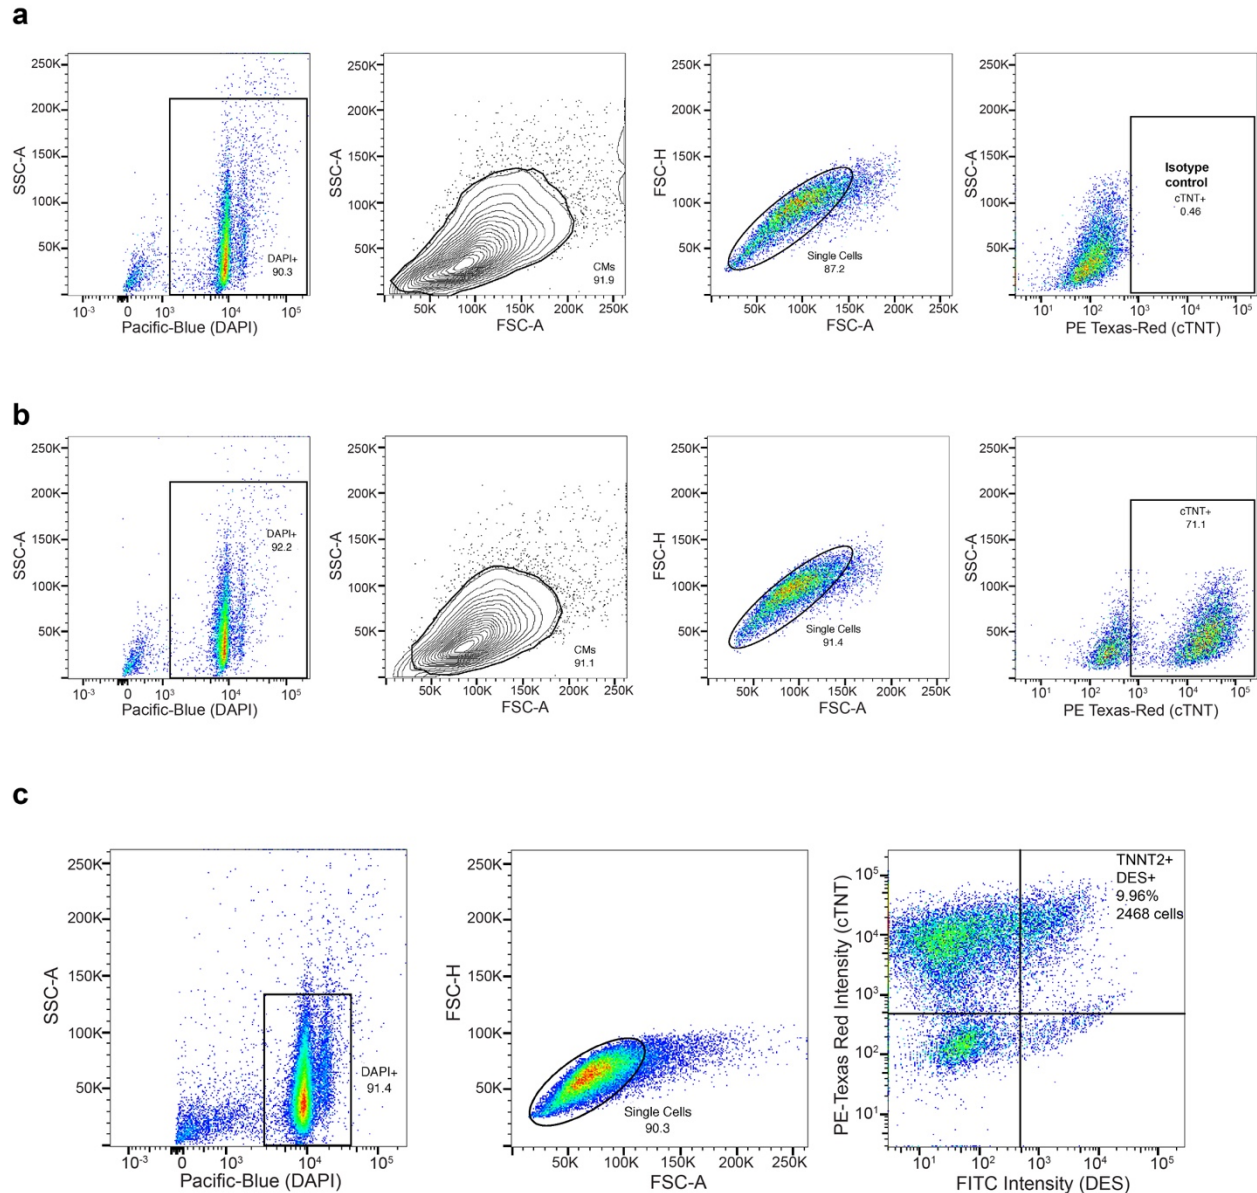

1256

1258

**Extended Data 20. Gating strategies for flow cytometry. a, b,** Gates were determined in each of the isotype controls per genotype and applied to genotype-matched samples. First, gates were drawn around DAPI<sup>+</sup> cells in SSC-A vs. Pacific-Blue plots. Next, SSC-A vs. FSC-A plots were used to exclude debris. Single cells were then isolated by gating of FSC-H vs. FSC-A plots. cTNT<sup>+</sup> gates were drawn in SSC-A vs. FITC plots. **c,** For cTNT<sup>+</sup>/DES<sup>+</sup> cells, PE-Texas Red vs. FITC plots were used.

1266

1268

1270

## Supplementary Tables.

1272

**Supplementary Table 1.** Curated gene lists, which are used in this study, include electrophysiology (EP)-related genes, human congenital heart disease (CHD)-associated genes, mouse CHD-associated genes and cardiac development-related genes.

1276

**Supplementary Table 2.** Lists of differential genes from comparisons between *TNNT2*<sup>+</sup> clusters, at day 11 or day 23, or by biological replicate or genetic background at day 23.

1278

**Supplementary Table 3.** TBX5-sensitive gene regulatory network analyses, by pagerank or degree, or by correlation with *TBX5* or *MEF2C* expression.

1282

**Supplementary Table 4.** Data for odds ratios for correlation of human TBX5-dependent genes near TBX5 or GATA4 occupancy, congenital heart disease (CHD)-associated GWAS, electrophysiology (EP)-related GWAS, CHD-associated genes, or EP-related genes.

1284

1286

**Supplementary Table 5.** Odds ratios for co-occupancy data near human TBX5-dependent genes for TBX5 and GATA4, or for co-occupancy of TBX5, MEF2c and MEF2a near human or mouse TBX5-dependent genes.

1288

1290

**Supplementary Table 6.** Data for odds ratios for correlation of human or mouse TBX5-dependent genes near TBX5, MEF2c or MEF2a occupancy, congenital heart disease (CHD)-associated GWAS, electrophysiology (EP)-related GWAS, CHD-associated genes, or EP-related genes.

1292

1294

**Supplementary Table 7.** Bulk RNAseq data of mouse embryonic hearts at E10.5 for an allelic series of *TBX5* mutants.

1296

1298

**Supplementary Table 8.** Odds ratio for transcription factor (TF) binding of TBX5, MEF2c, or MEF2a within 1kb of the other TFs in the trio, near human or mouse TBX5-dependent genes.

1300

1302

1304
